# Supplementary material for: Unveiling MYCN regulatory networks in neuroblastoma via integrative analysis of heterogeneous genomics data
Source: PubMed Central journal article supplement (PMC5095001; doi:10.18632/oncotarget.9202), 2016-05-06
Supplement: oncotarget-07-36293-s001.pdf [file oncotarget-07-36293-s001.pdf]

## Unveiling MYCN regulatory networks in neuroblastoma via integrative analysis of heterogeneous genomics data

### Supplementary Materials

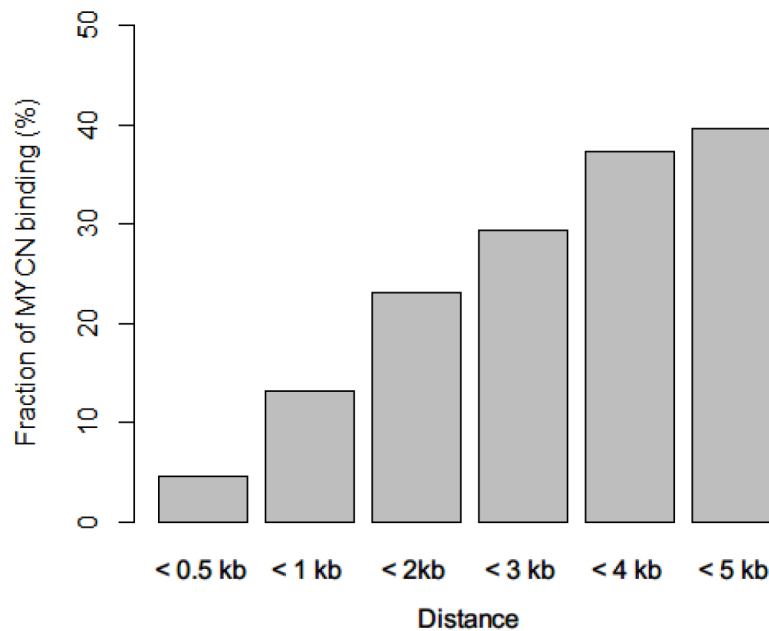

**Supplementary Figure S1: The comparison of MYCN binding sites identified by our ChIP-seq data and Murphy's study.** Murphy *et al.* performed anit-MYCN ChIP-chip experiments to identify the MYCN binding sites in Kelly, SK-N-AS, and TET21N neuroblastoma cell lines, and 256 common binding sites were identified [1]. Since the resolution of ChIP-seq and ChIP-chip are different, if the binding sites fell in a specific distance, we considered these binding sites were the same. With various distance values, the proportions of 256 sites overlapped by our datasets were calculated.





## MCM7 (minichromosome maintenance complex component 7)

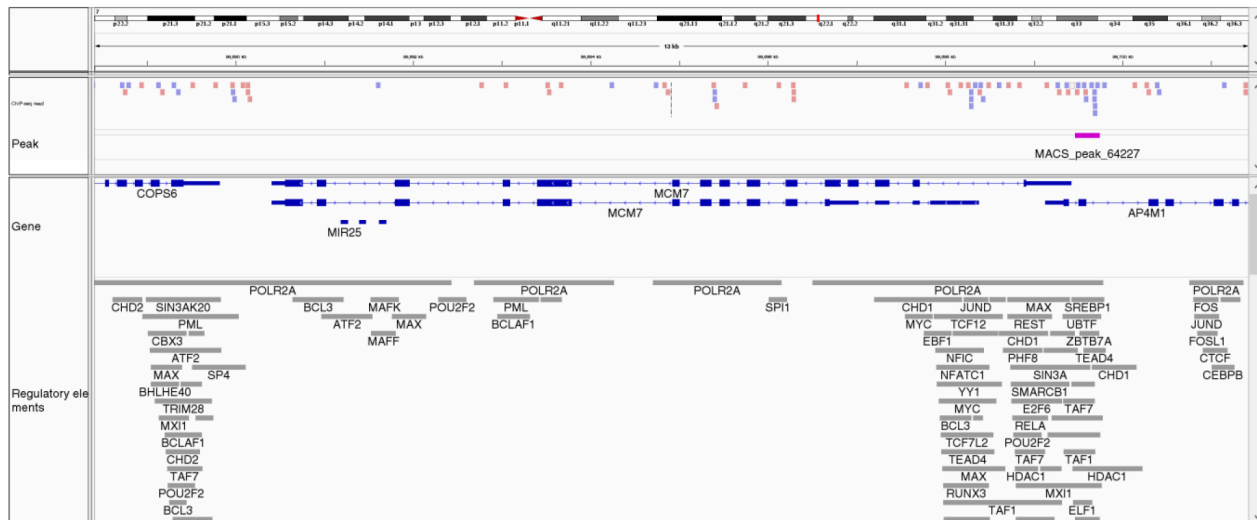

## MCM8 (minichromosome maintenance complex component 8)

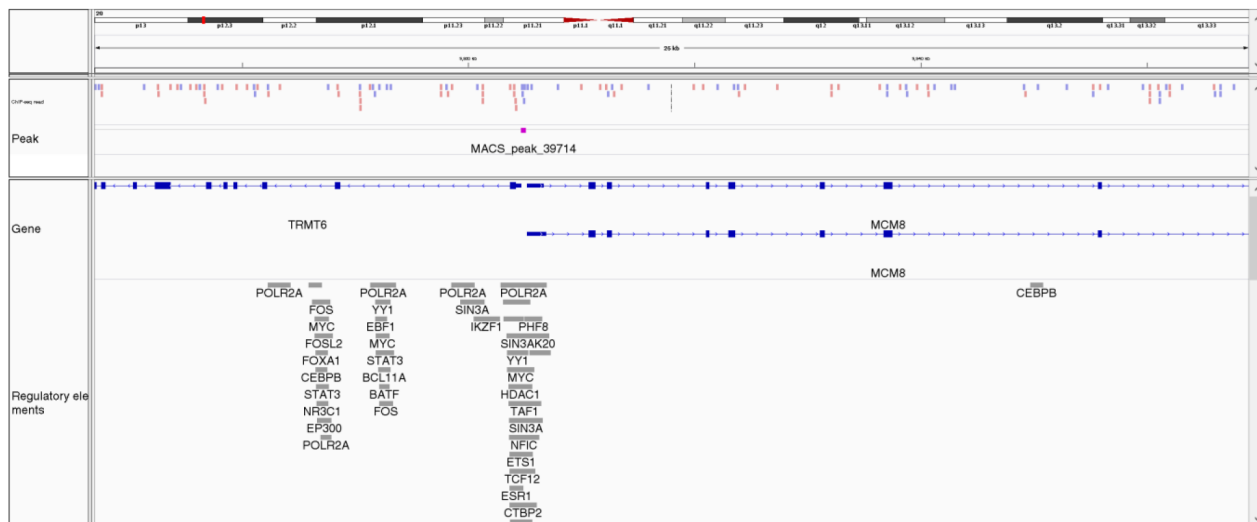

## ODC1 (ornithine decarboxylase 1)

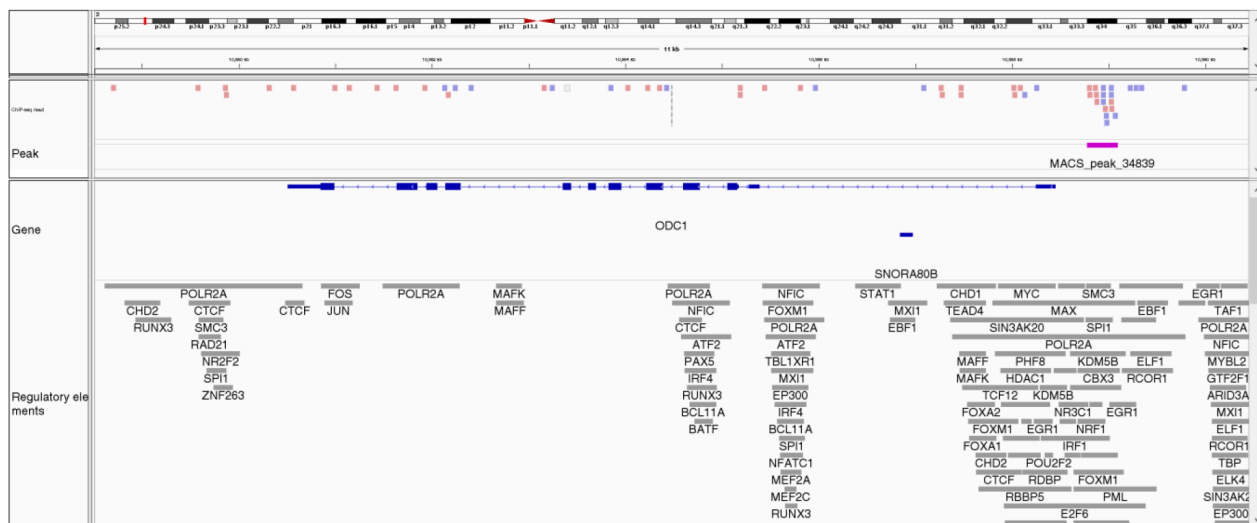

## BIRC5 (baculoviral IAP repeat containing 5)

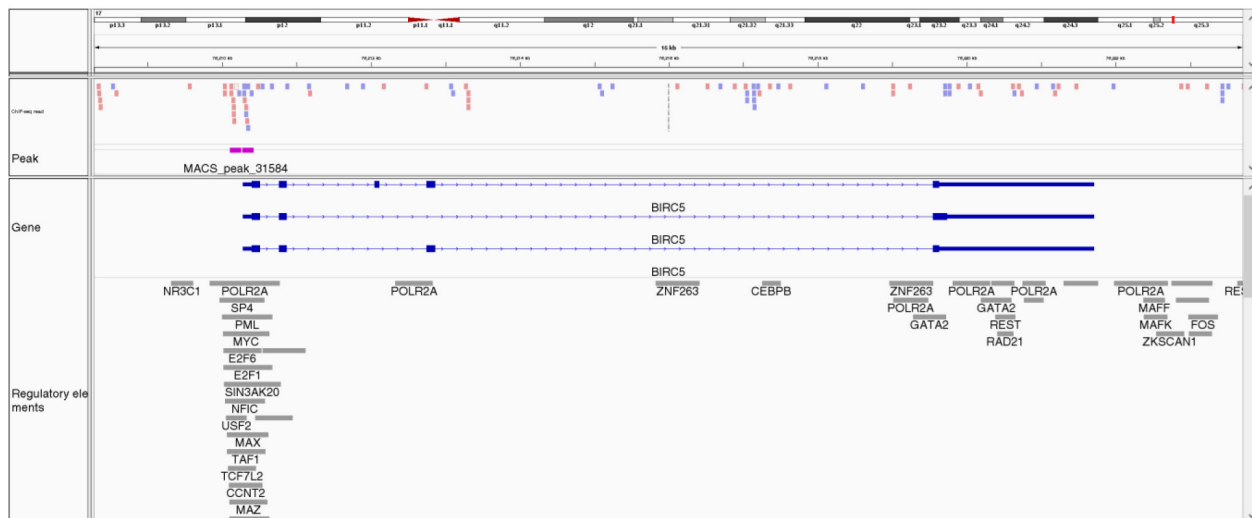

## LUC7L (LUC7-like)

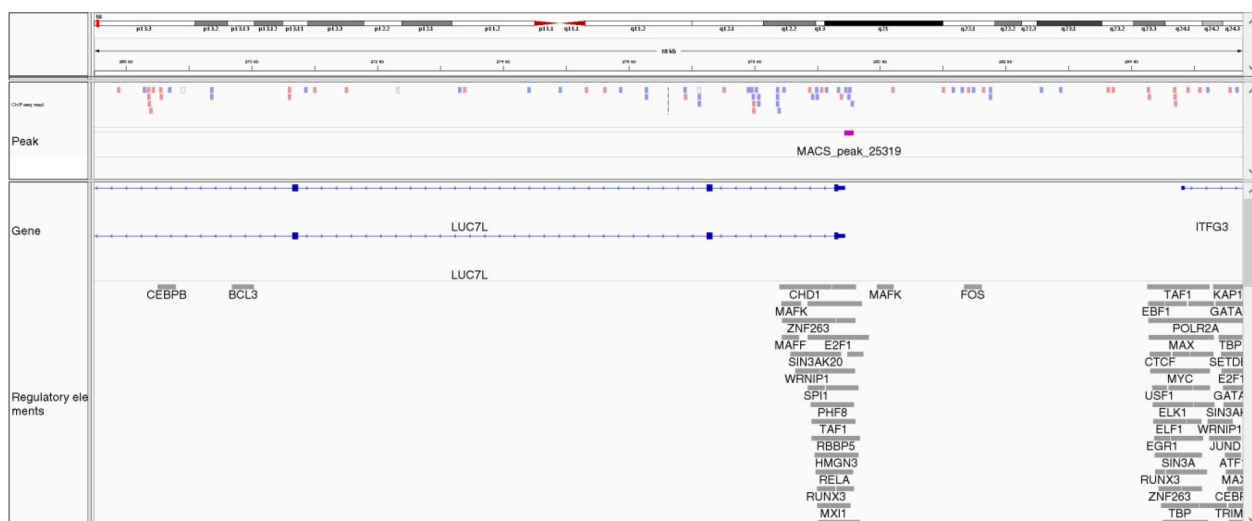

## TWIST1 (twist family bHLH transcription factor 1)

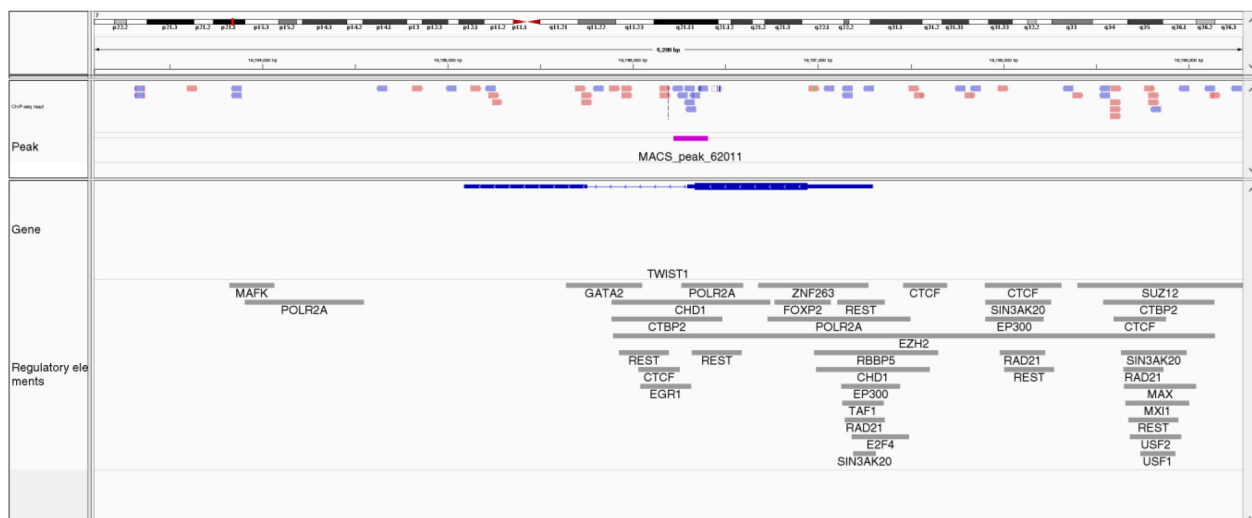

## RAB5C (baculoviral IAP repeat containing 5)

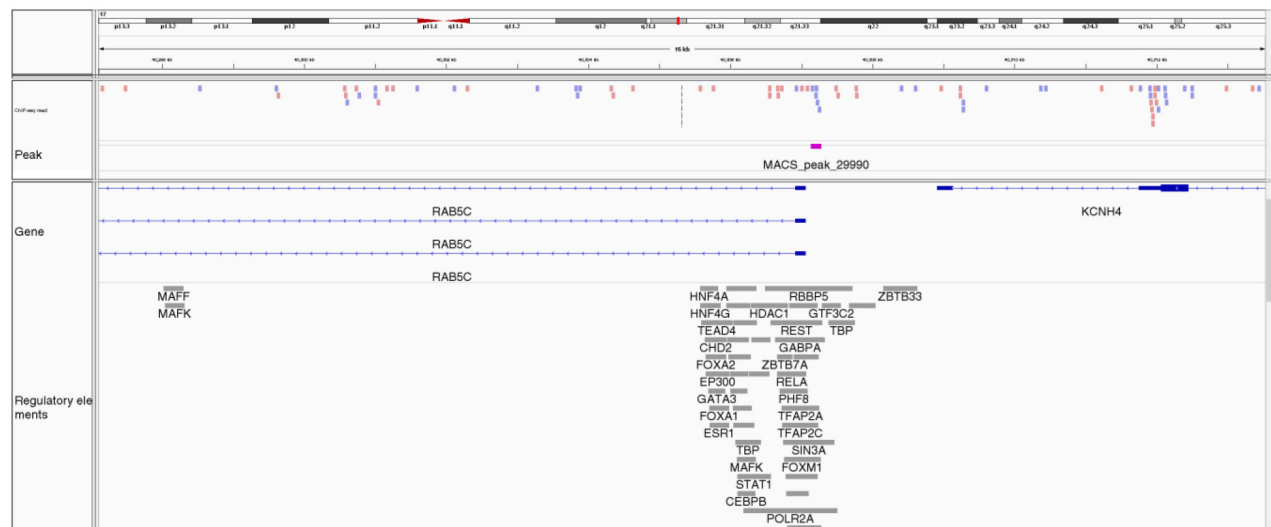

## AURKA (aurora kinase A)

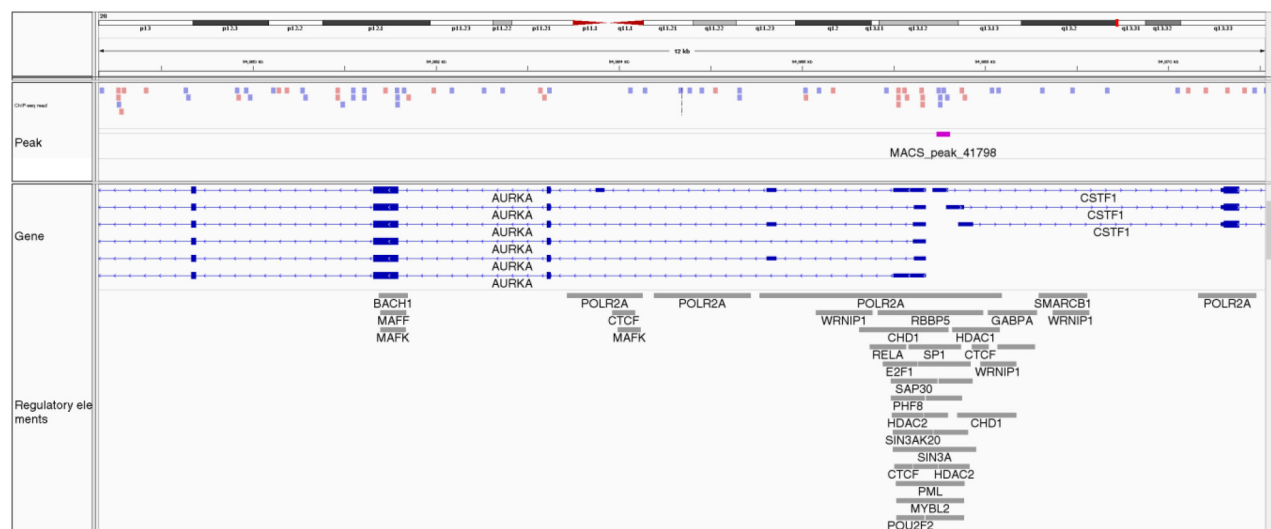

## H1F0 (H1 histone family, member 0)

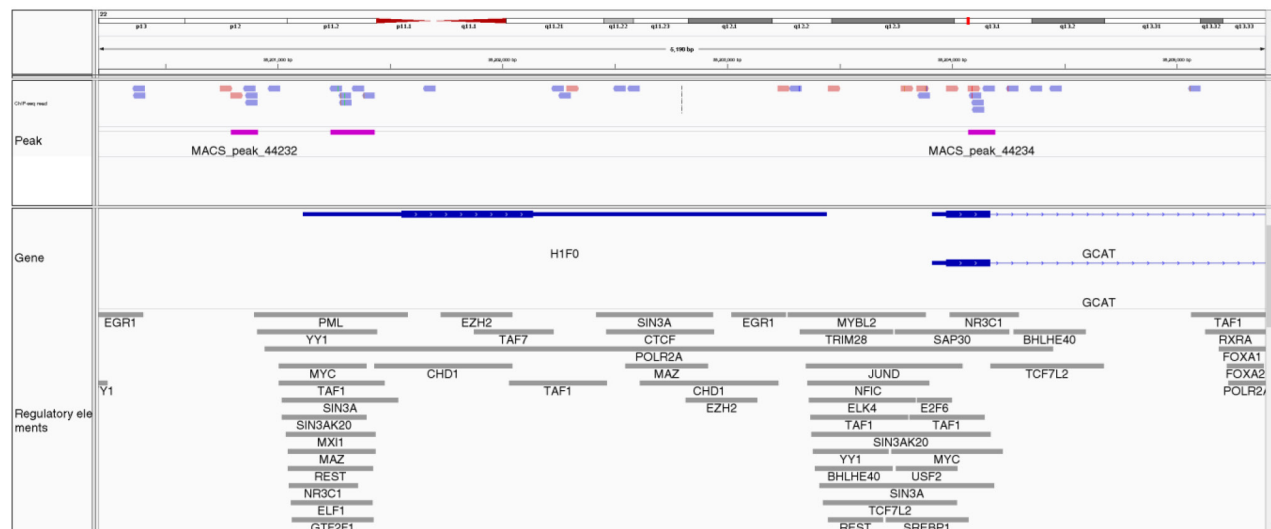

## MYBL2 (MYB proto-oncogene like 2)

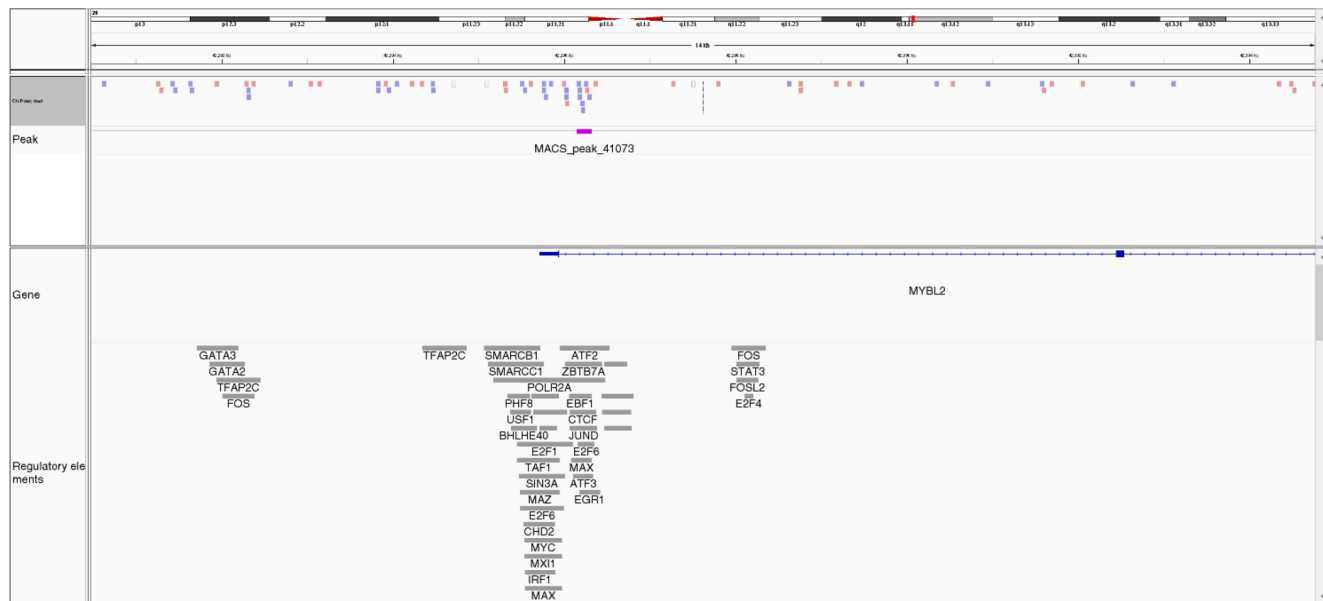

**Supplementary Figure S2: Genomic mapping of ChIP-seq data reveals binding of MYCN on the promoters of known MYCN-bound genes.** The ChIP-seq reads and peaks called by MACS were visualized by IGV (<http://www.broadinstitute.org/igv/>). The “regulatory elements” was obtained from UCSC genome browser (<https://genome.ucsc.edu/>).

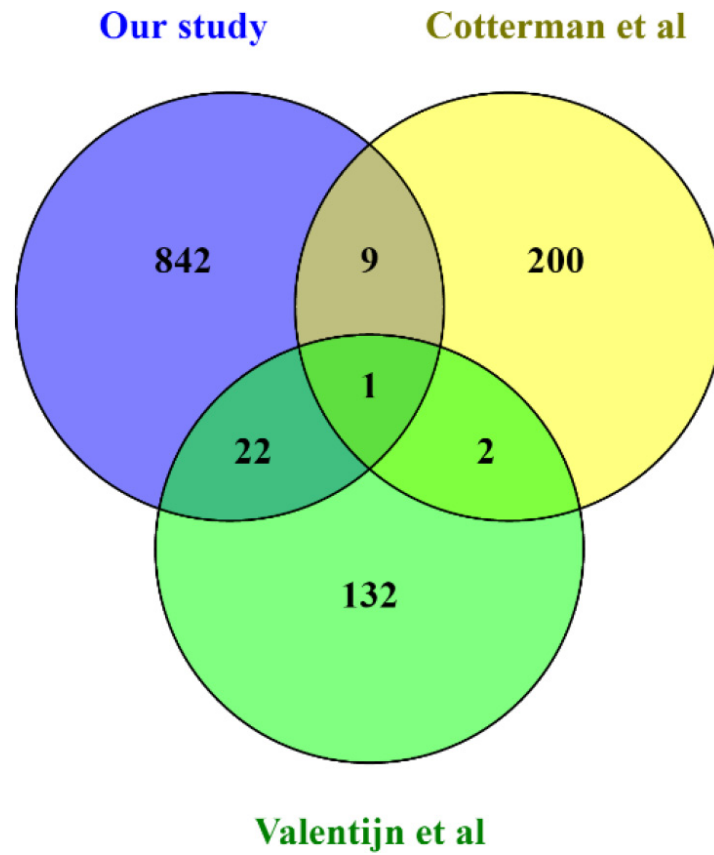

**Supplementary Figure S3: The comparison of MYCN-regulated genes identified by our method and other studies.** Cotterman et al. [2] and Valentijn et al. [3] identified 212 and 157 MYCN-regulated genes by integrating MYCN ChIP-chip and microarray experiments in IMR32 and TET21N cell lines, respectively.



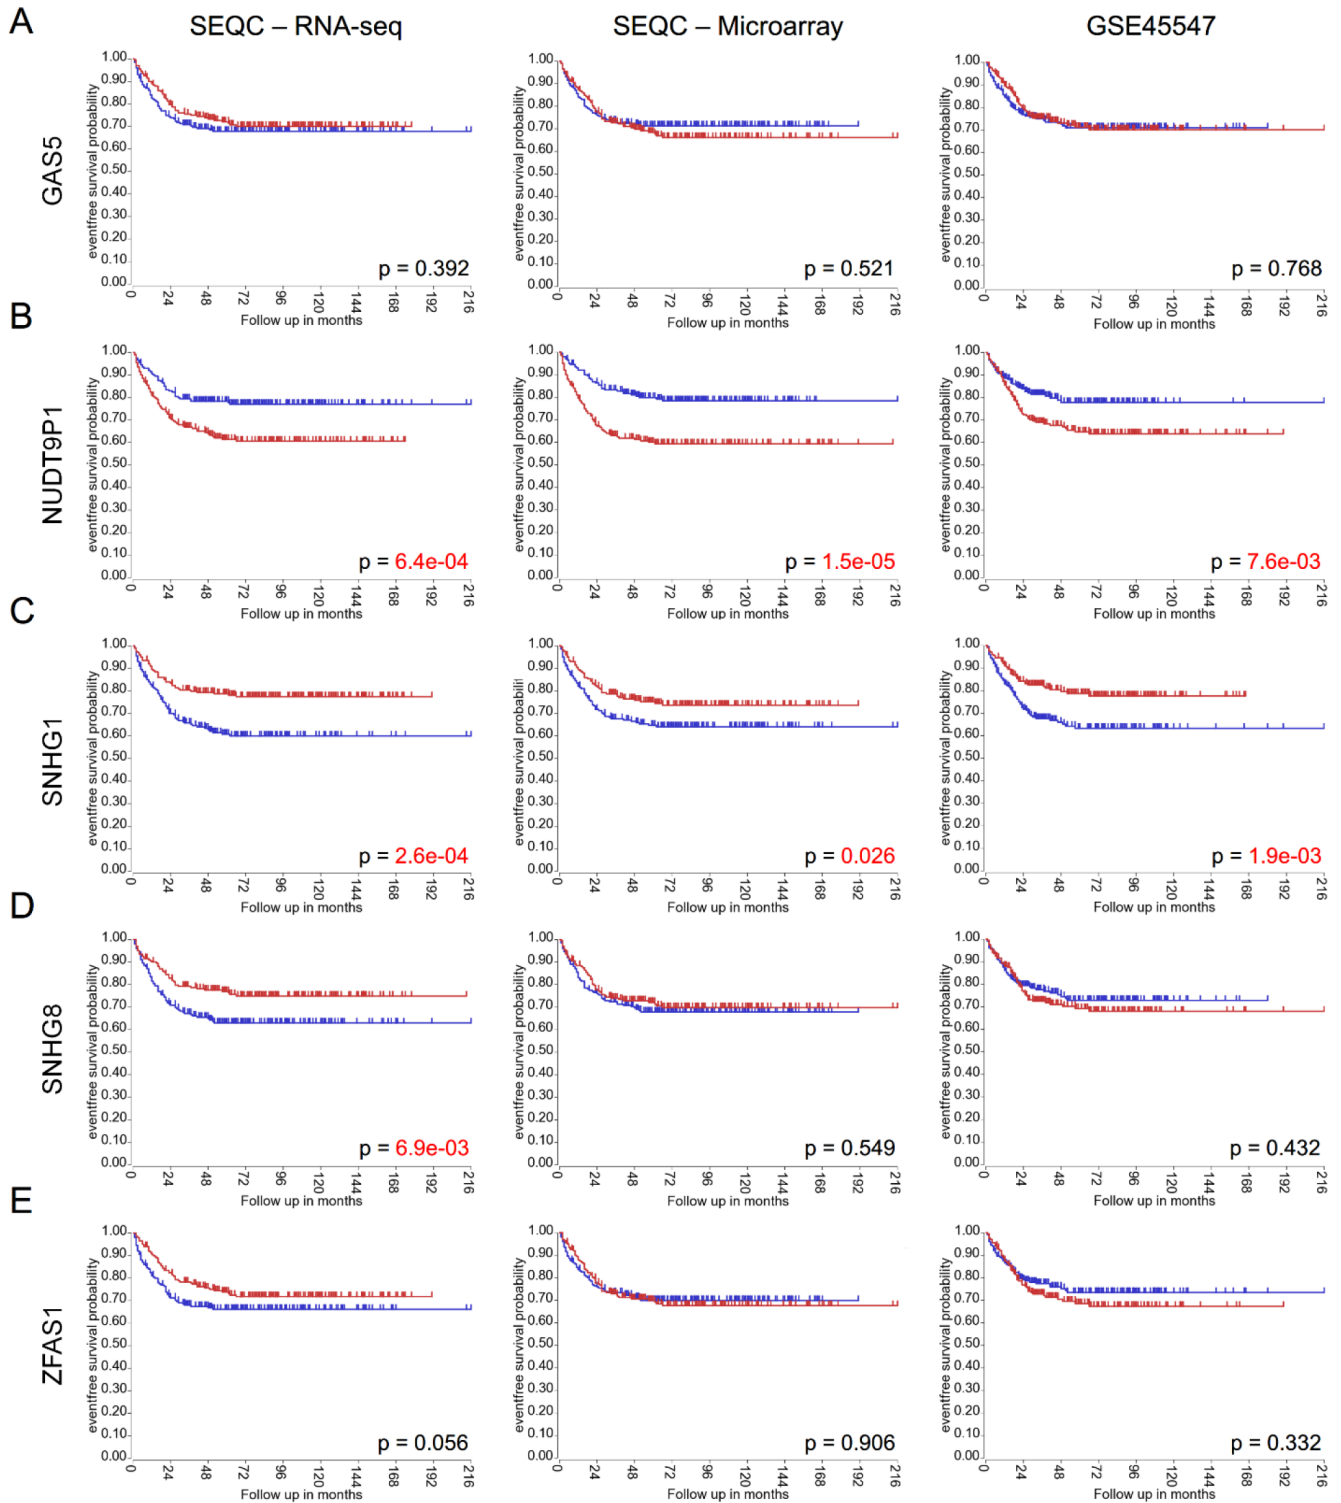

**Supplementary Figure S4: Some of MYCN-regulated long non-coding RNAs (lncRNAs) as a prognostic marker for neuroblastoma.** Kaplan-Meier curve indicating survival (in months) of patients with high (blue) and low (red) expression of five lncRNAs (GAS5 (A), NUTD9P1 (B), SNHG1 (C), SNHG8 (D), and ZFAS1 (E)) based on median values in three different cohort data. The figures are generated by R2 bioinformatics tool (<http://r2.amc.nl>). The indicated p values were obtained from Log-rank test.

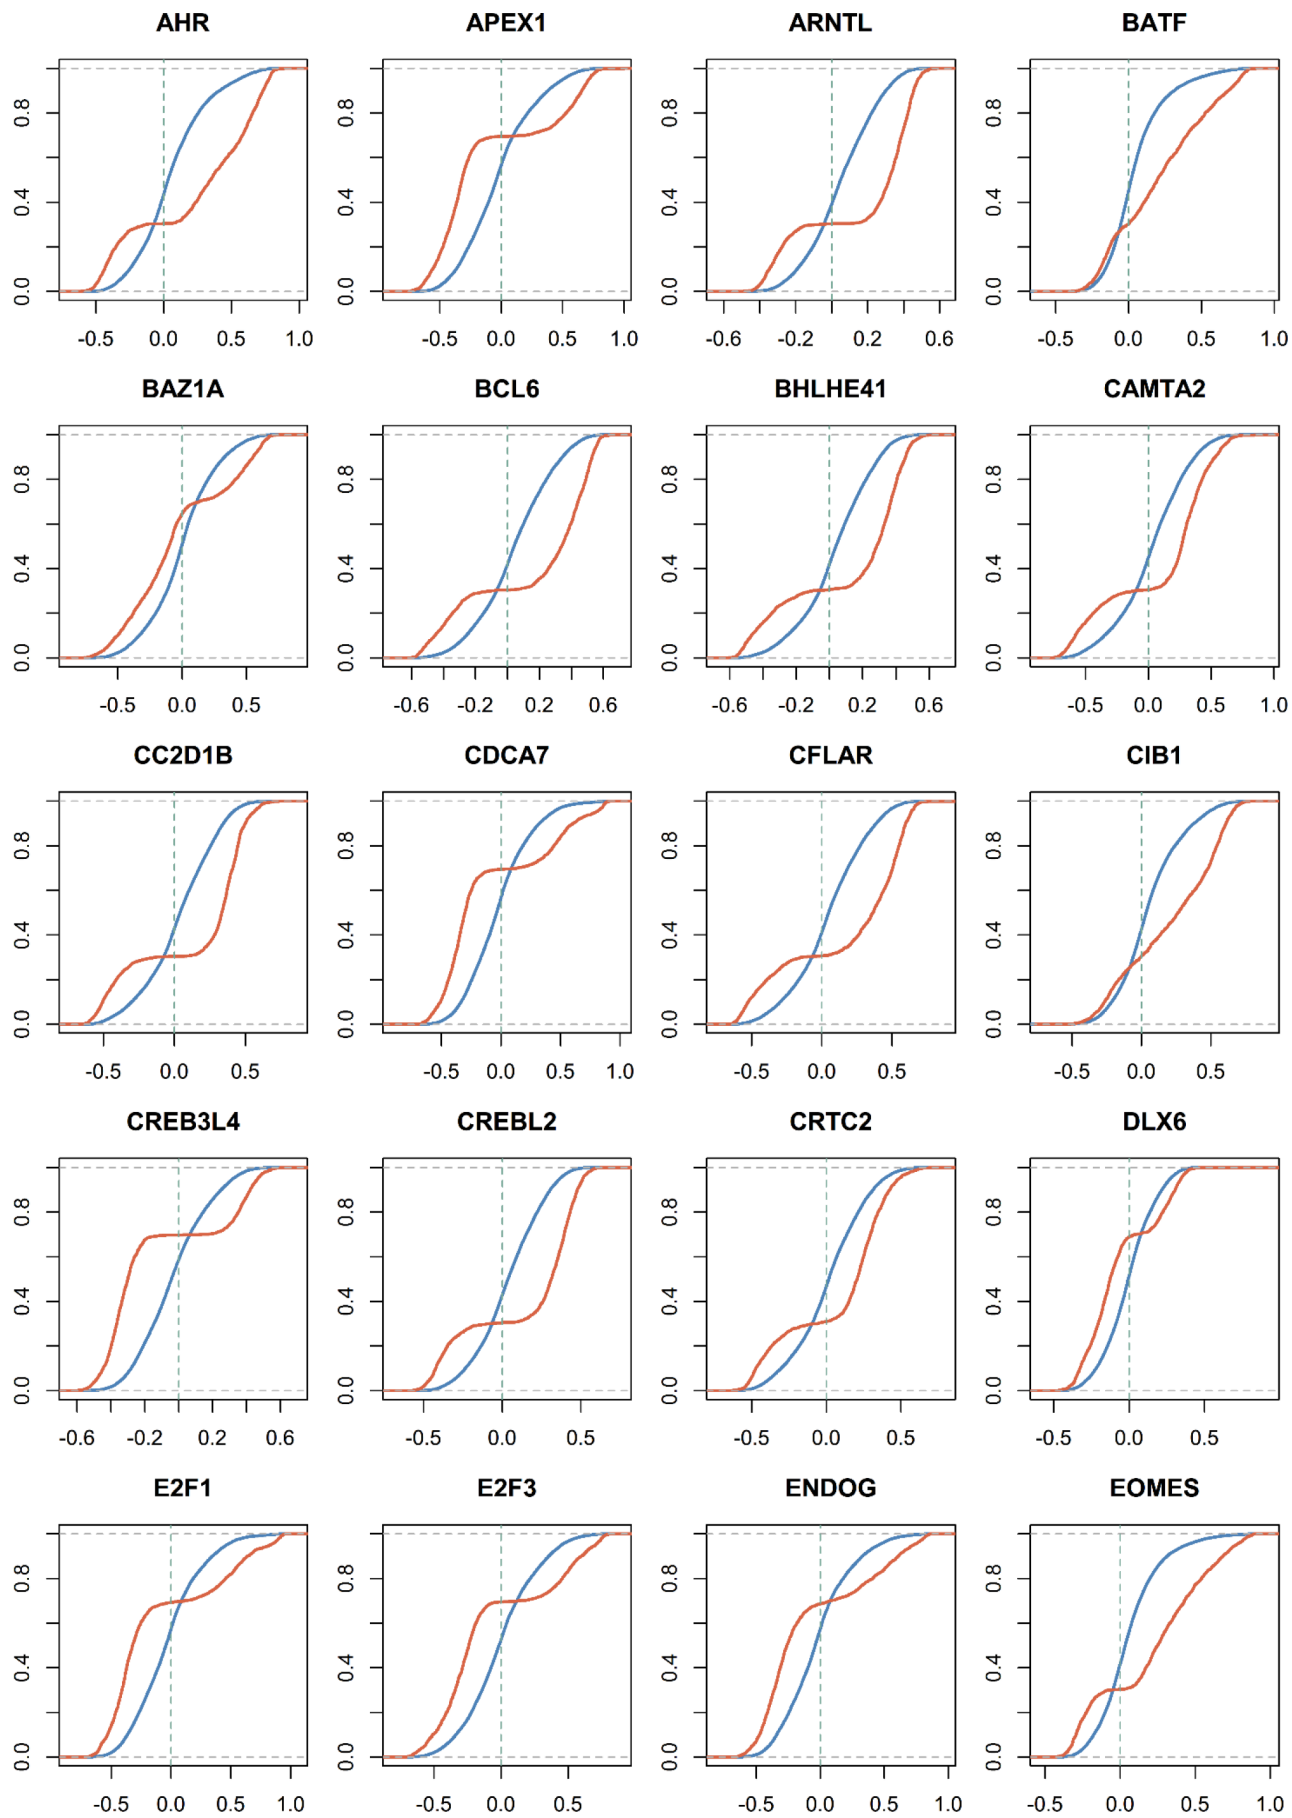

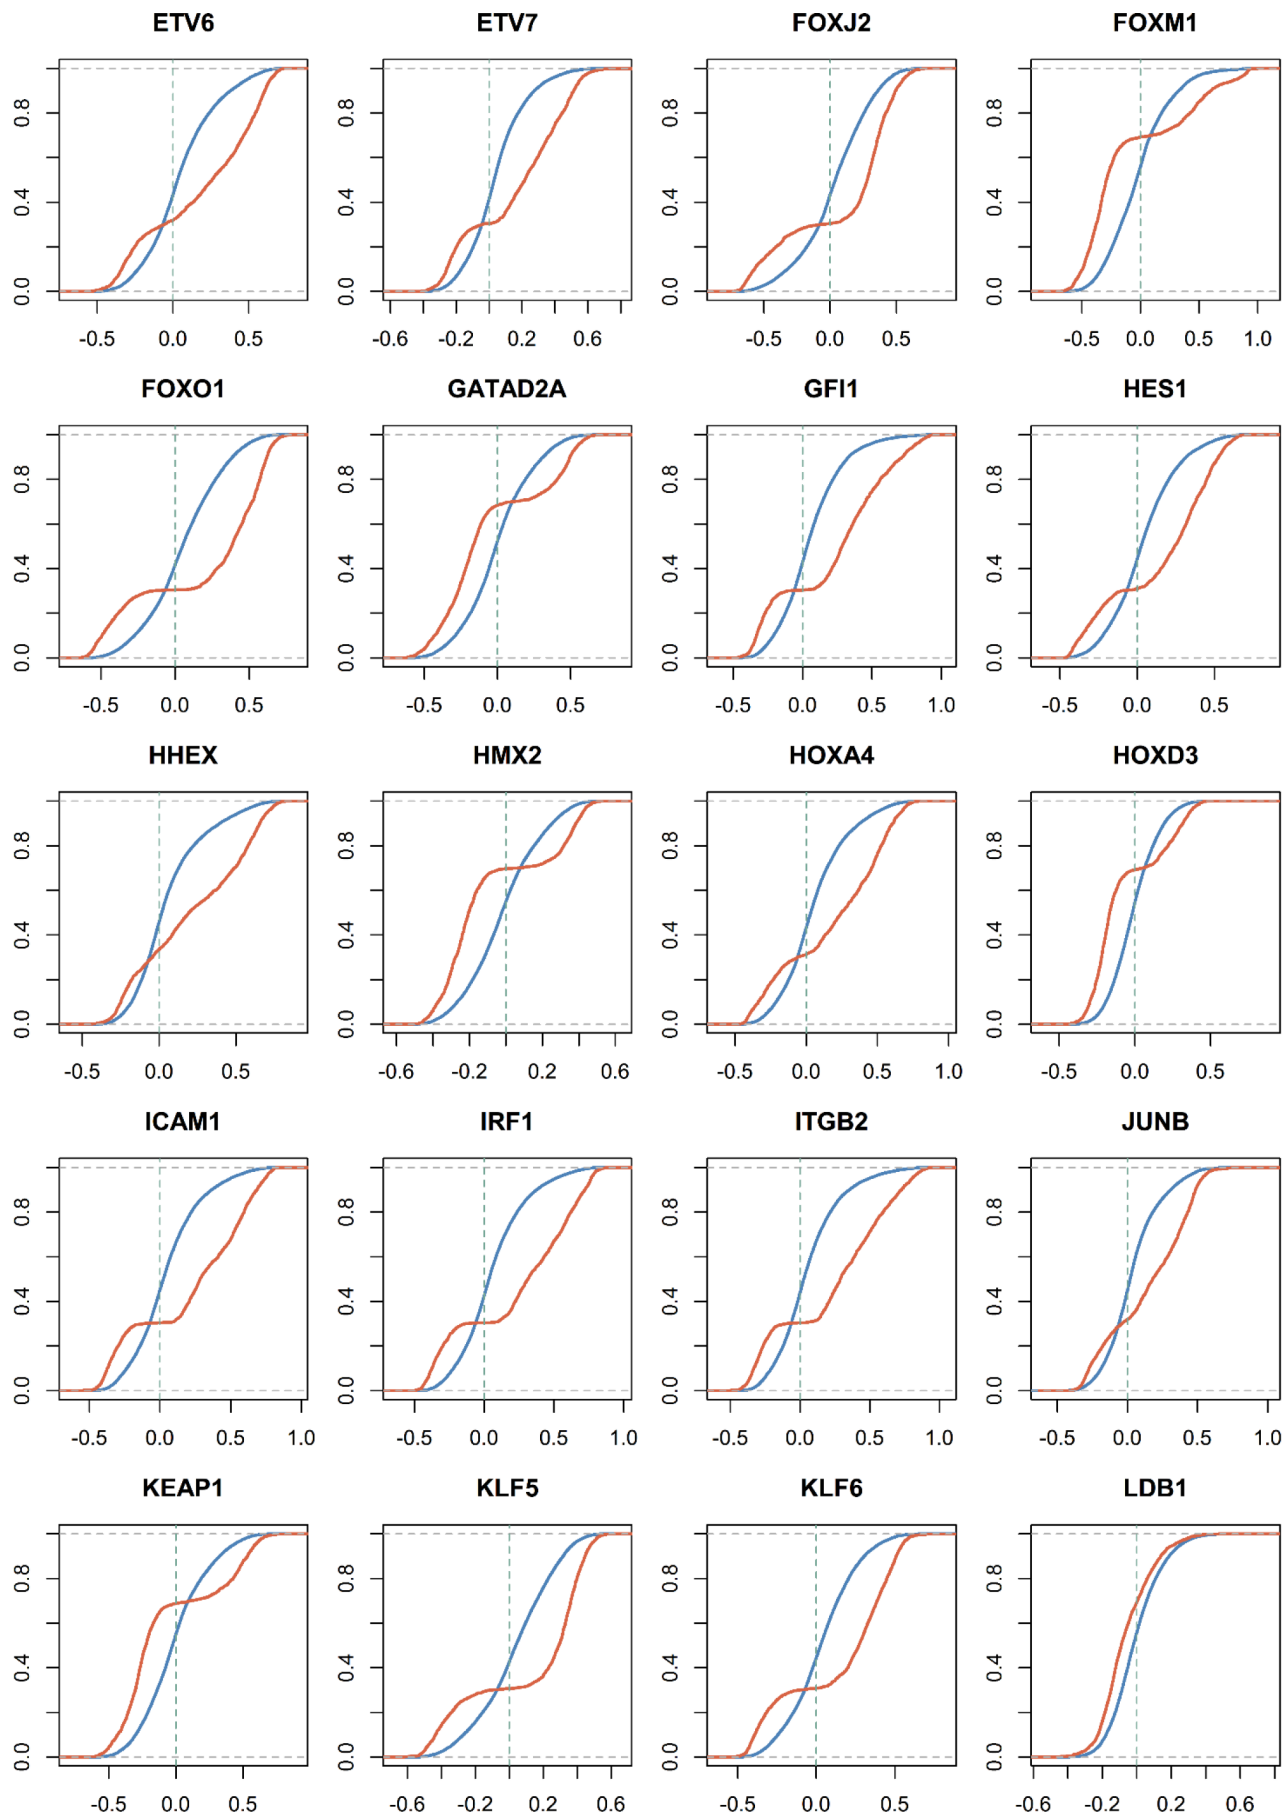

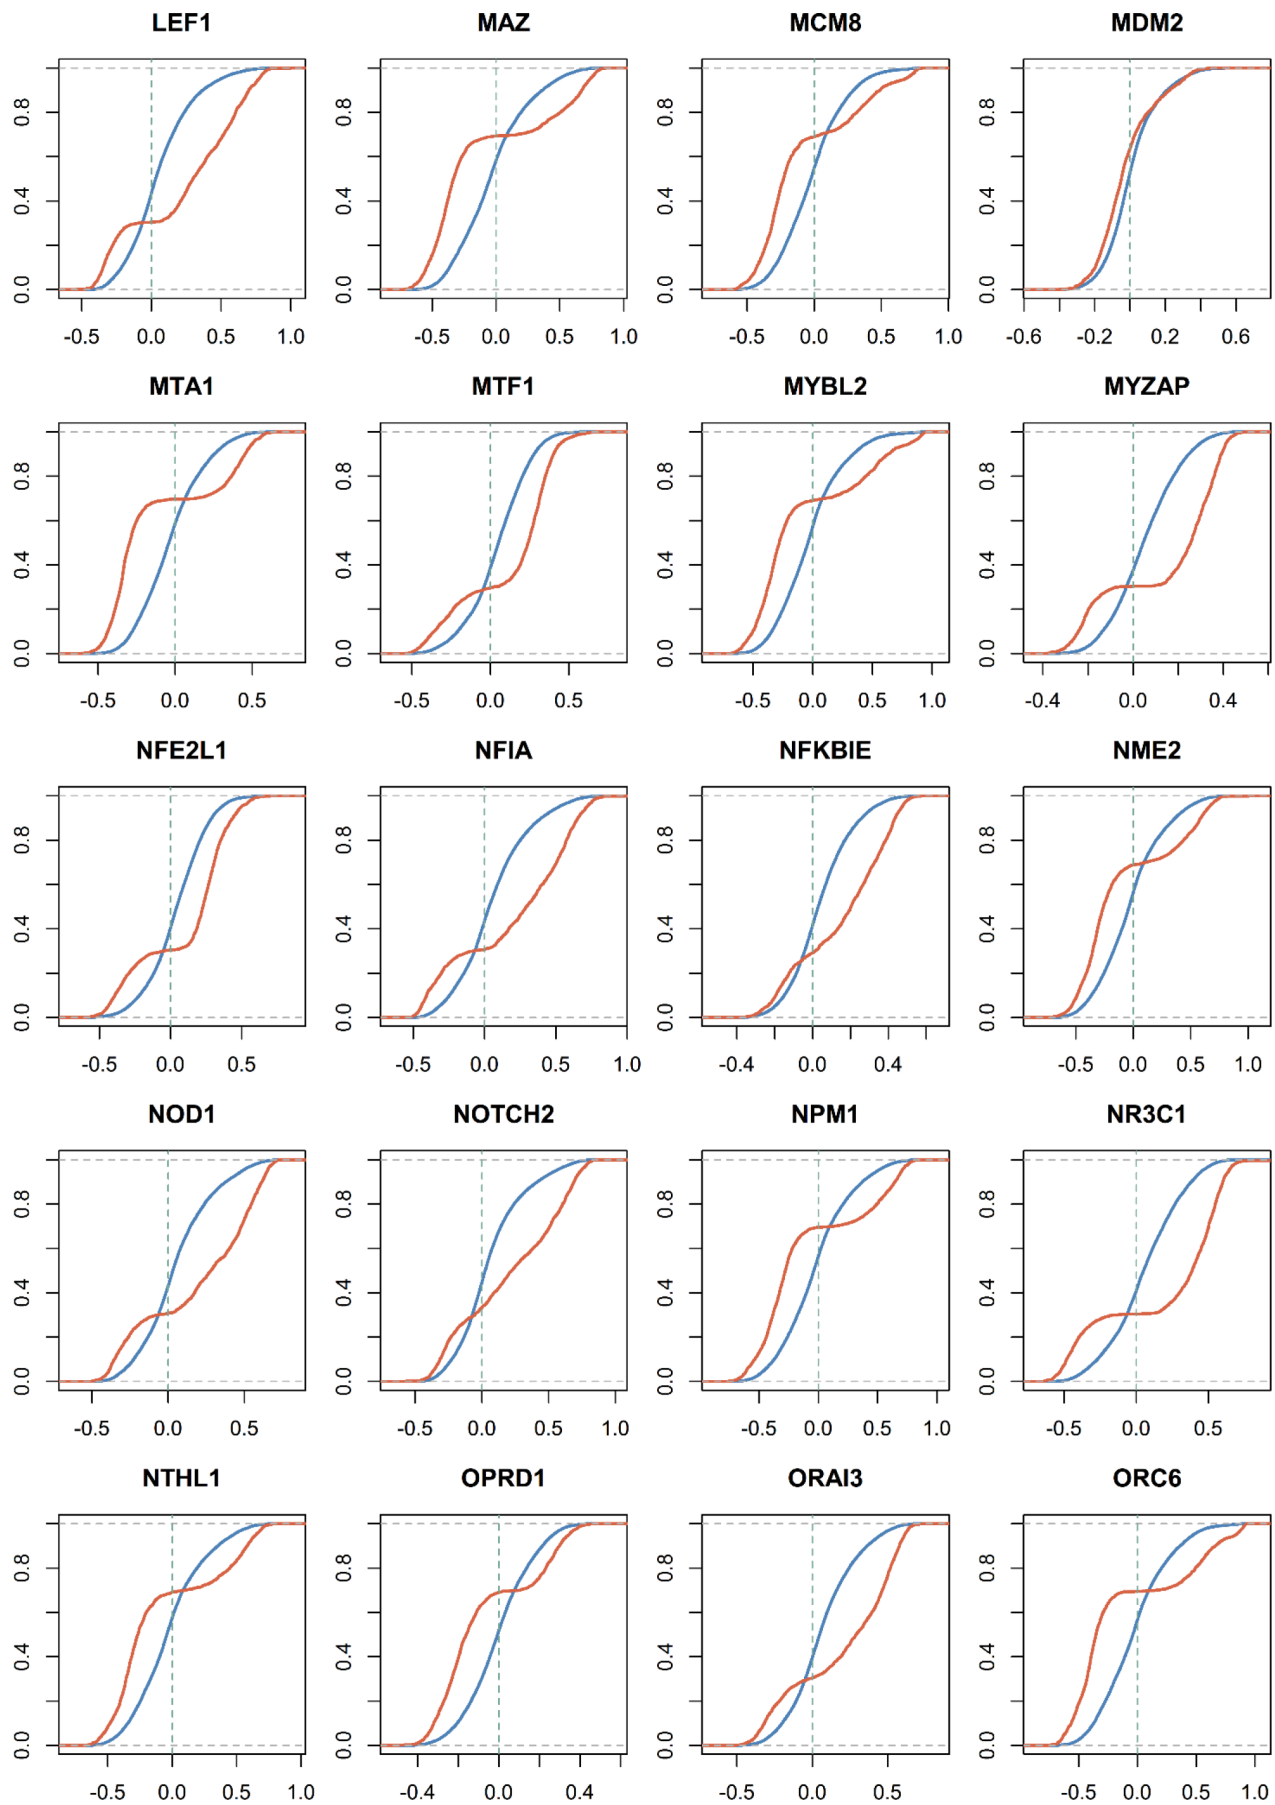

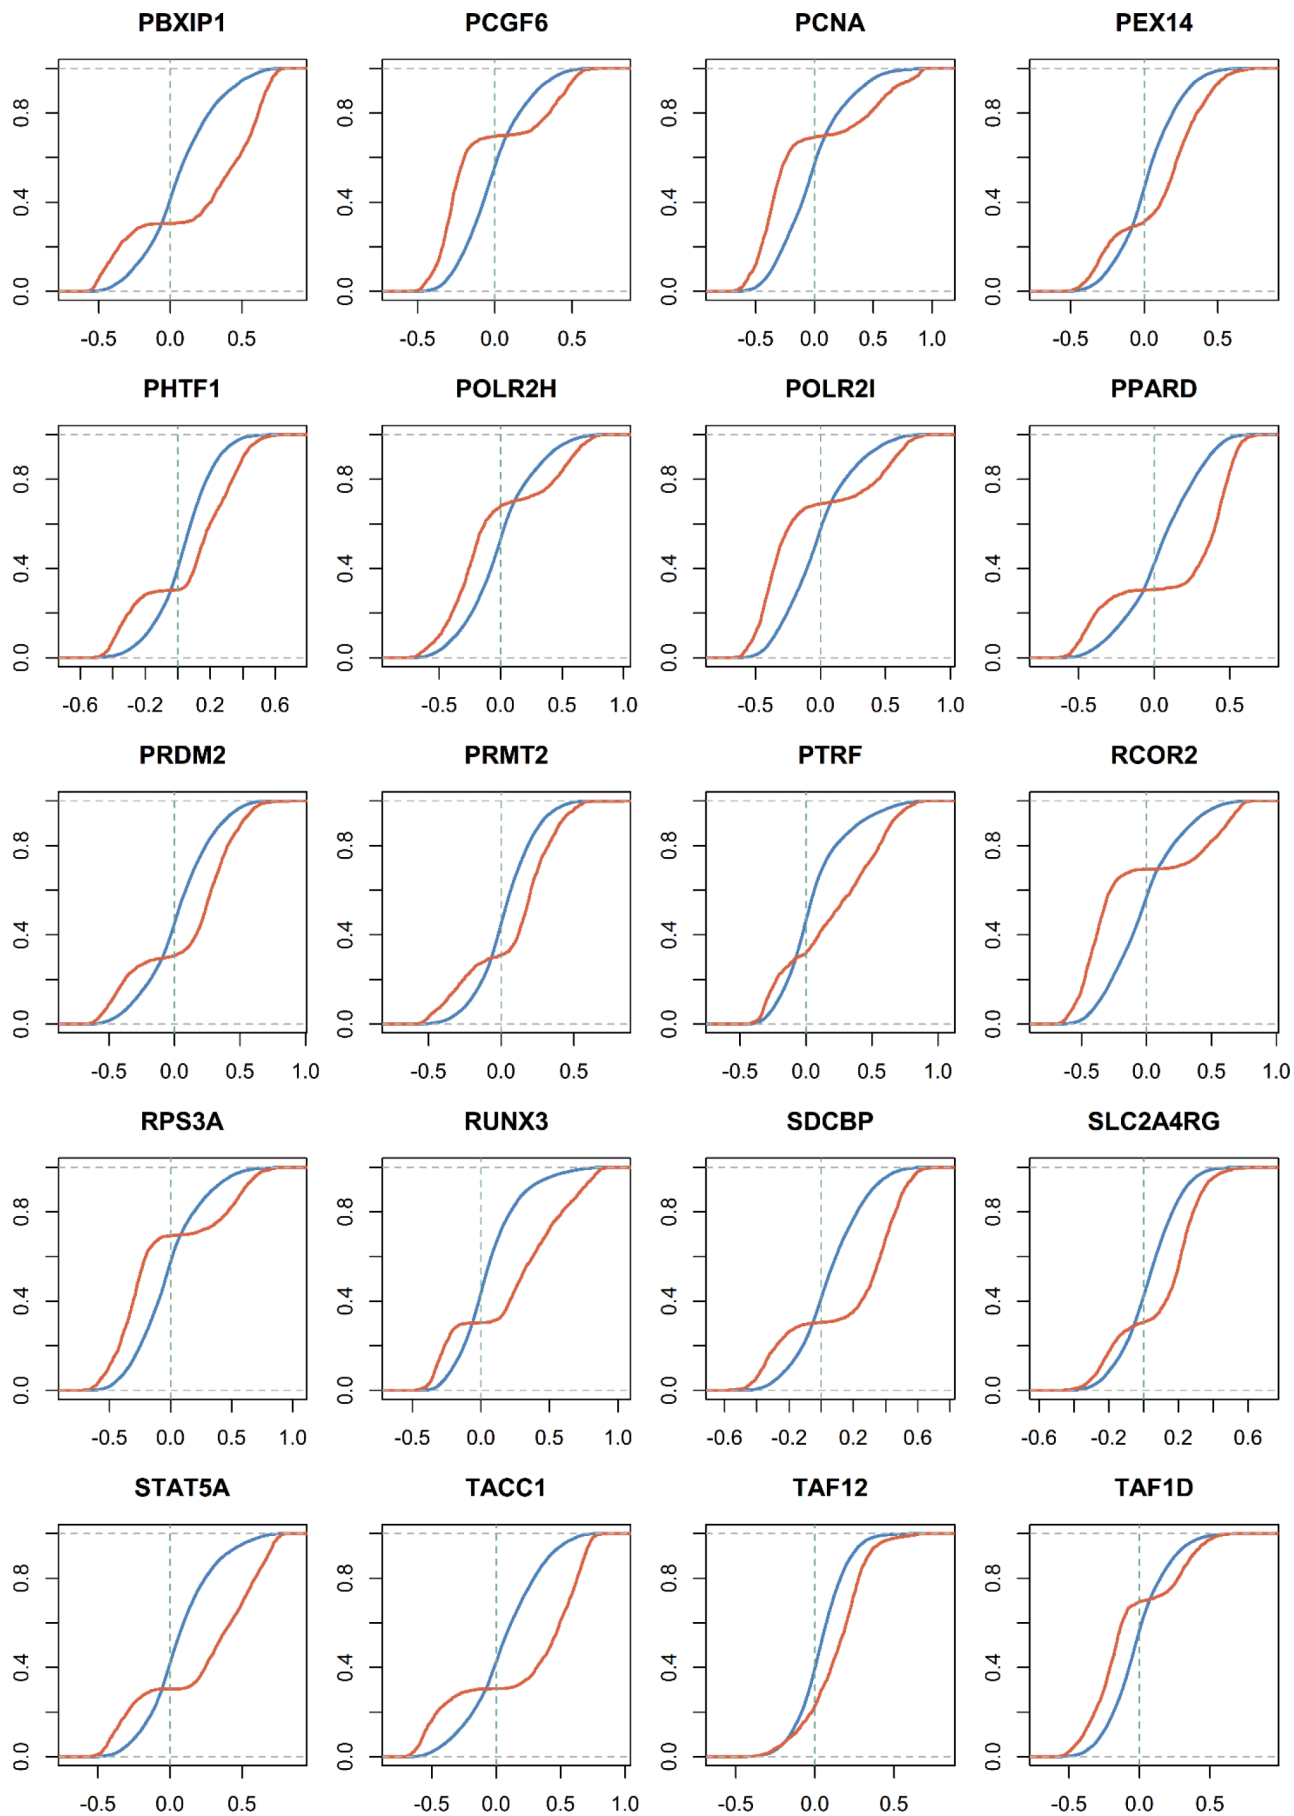

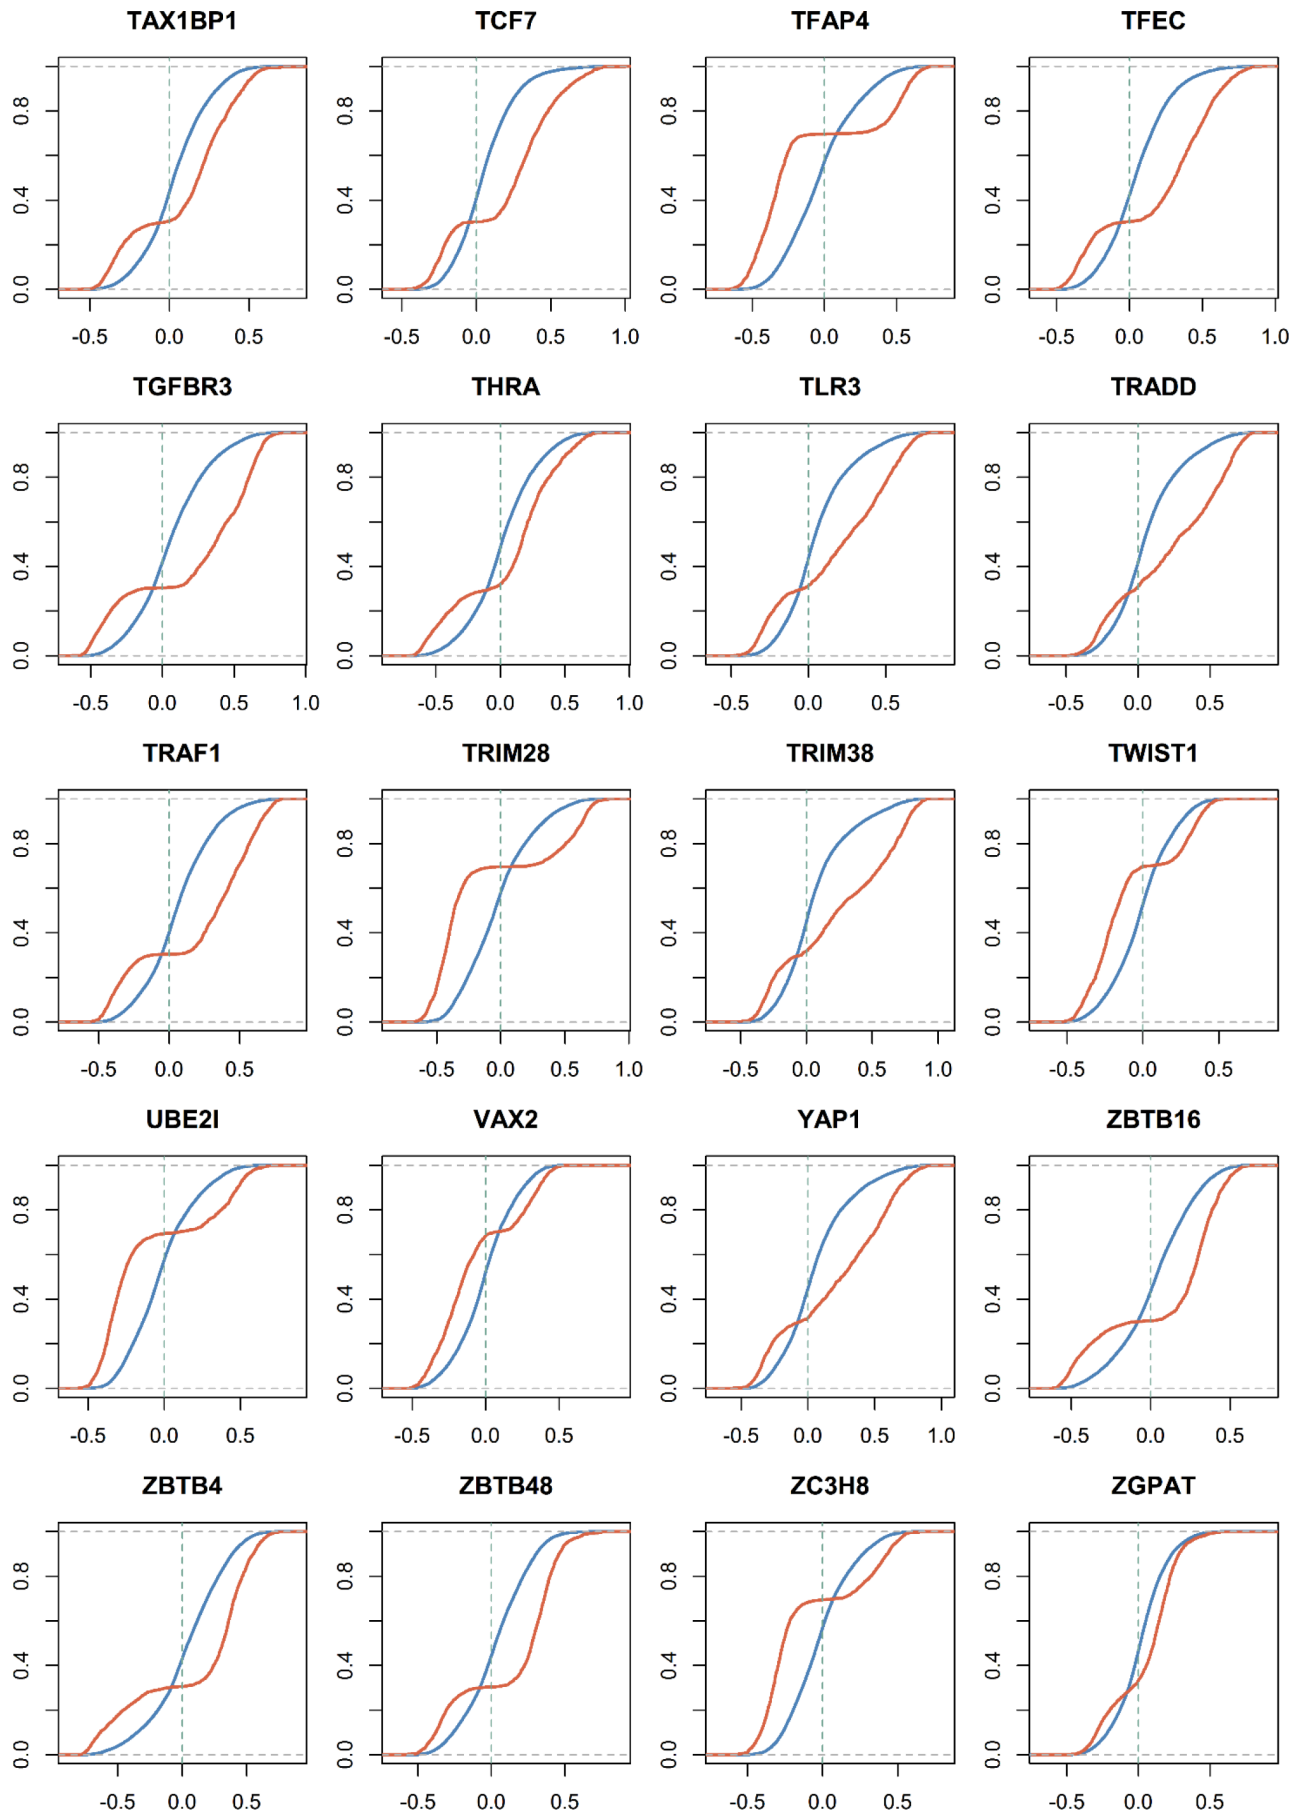

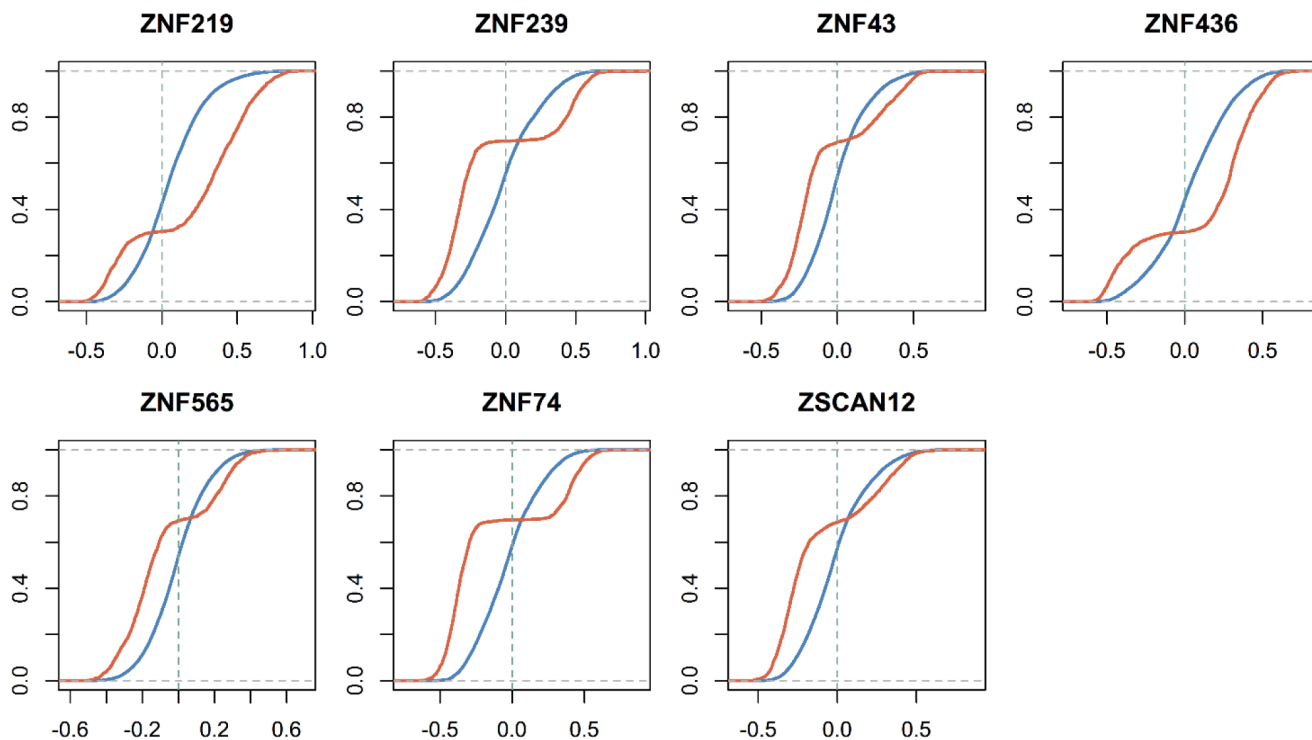

**Supplementary Figure S5: Correlation analysis between MYCN-correlated genes and MYCN-regulated transcription factors.** Red and green lines denote the correlation distribution of a given TF to MYCN-correlated genes and other genes, respectively. The x-axis is the Spearman correlation coefficient and the y-axis is the cumulative probability.

### ARID3A

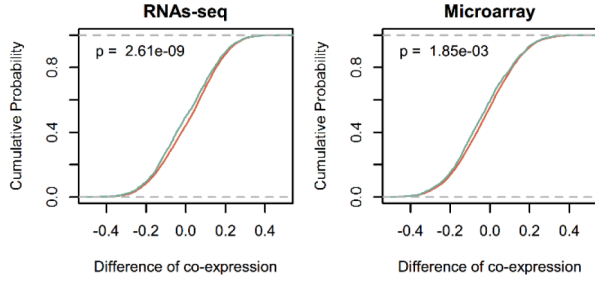

### ATF1

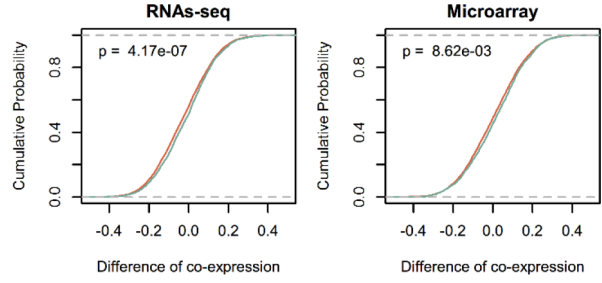

### ATF2

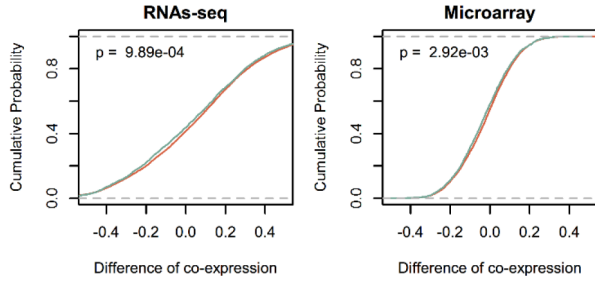

### BHLHE40

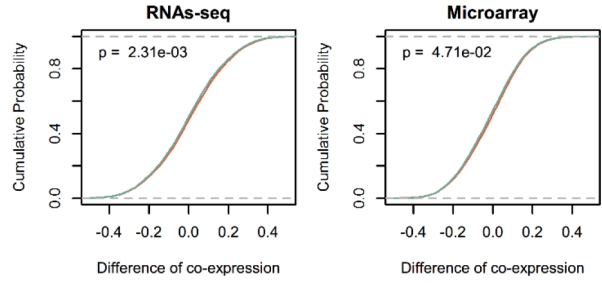

### BRCA1

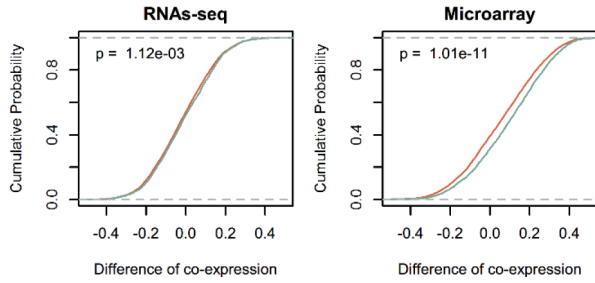

### CCNT2

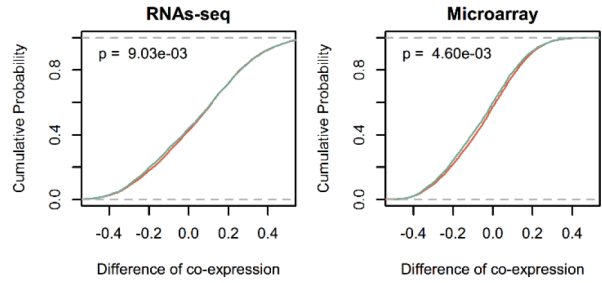

### ELK4

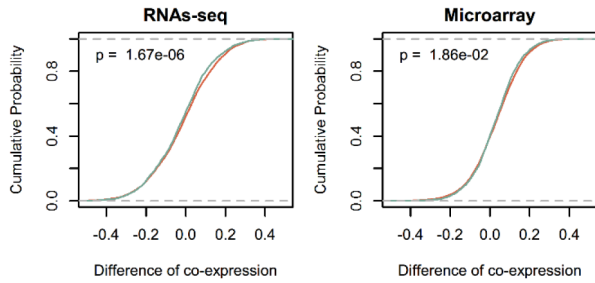

### EZH2

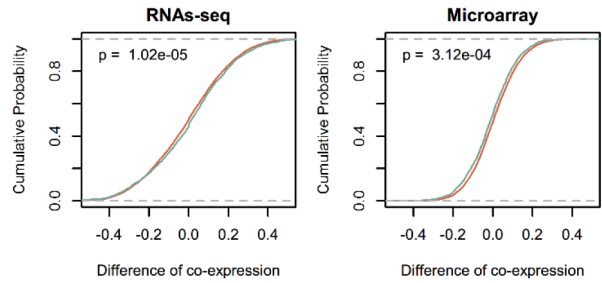

### GTF2B

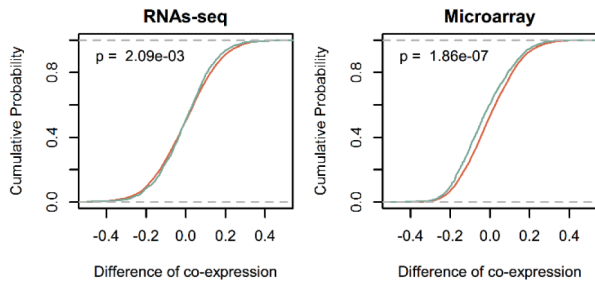

### GTF2F1

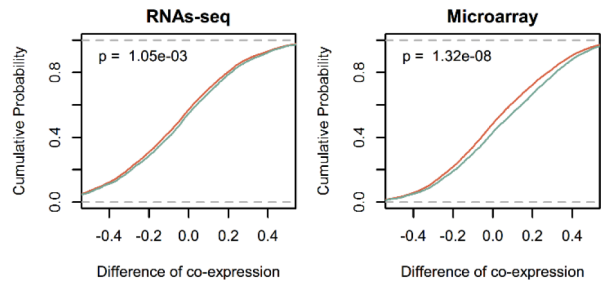



## HDAC1

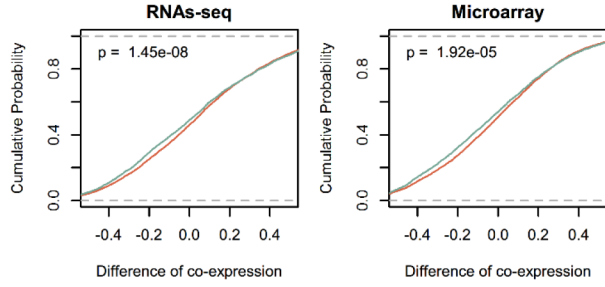

## HDAC2

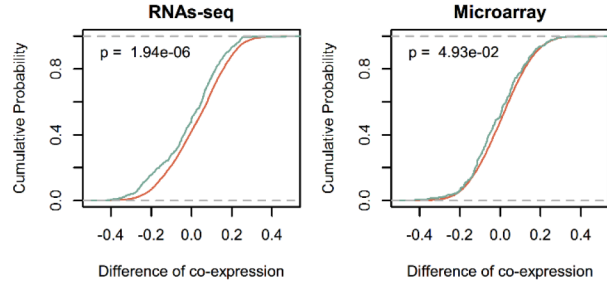

## HSF1

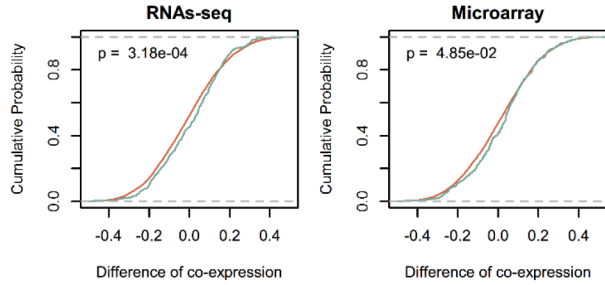

## IRF4

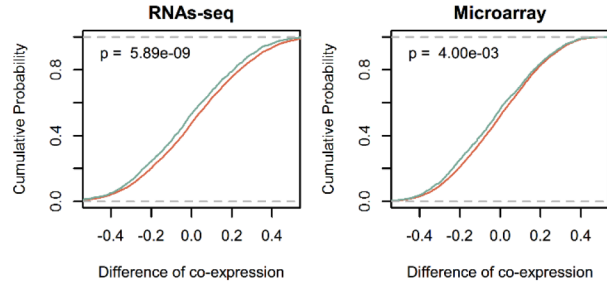

## MBD4

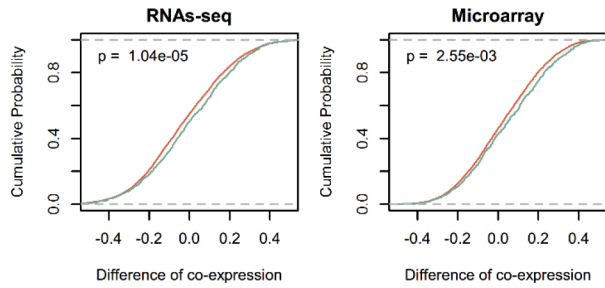

## MTA3

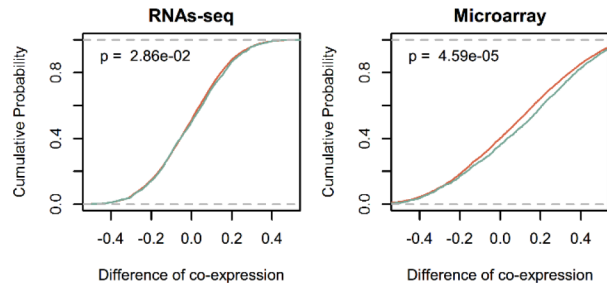

## MXI1

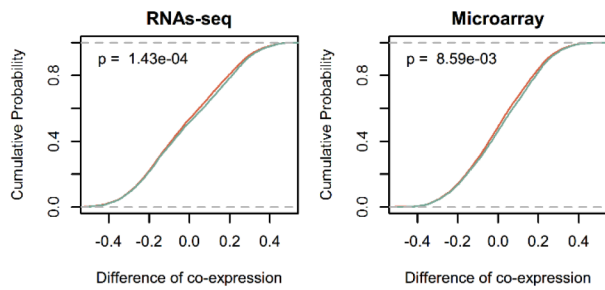

## MYBL2

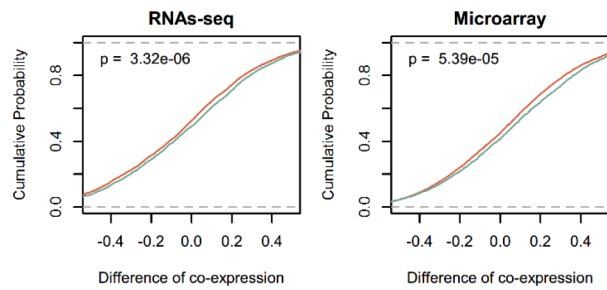

## NFACT1

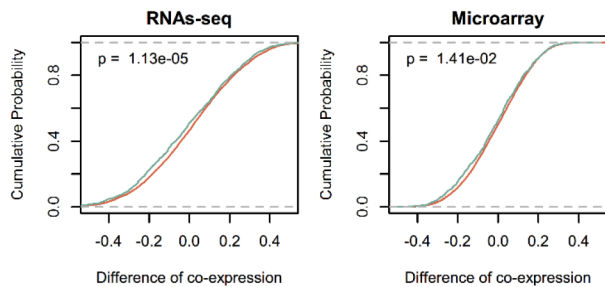

## NFYA

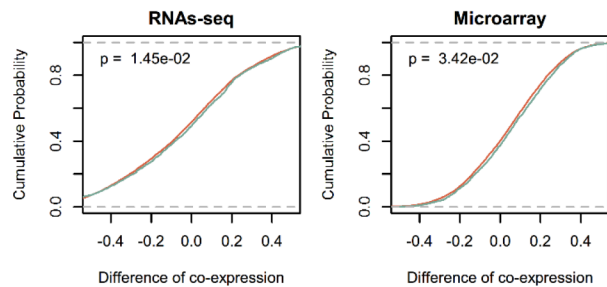

## POU2F2

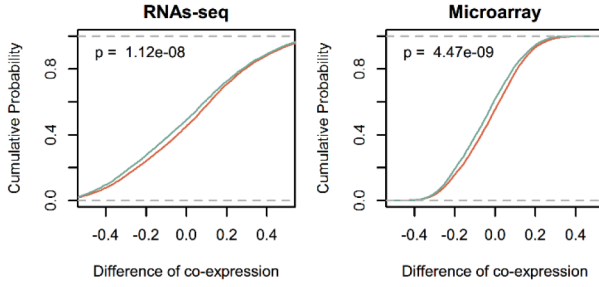

## PPARGC1A

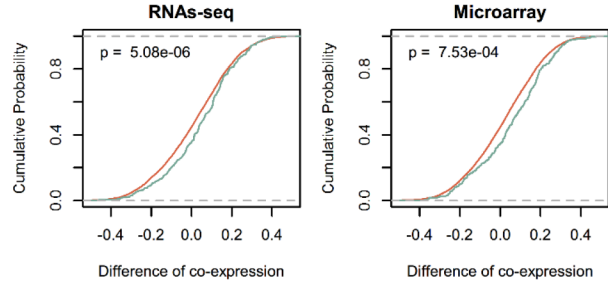

## RDBP

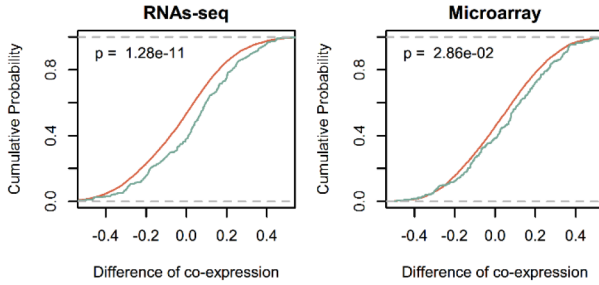

## SMARCB1

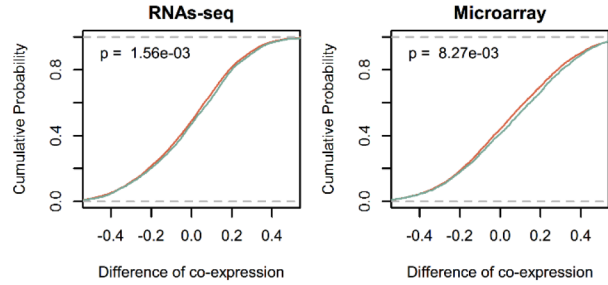

## STAT1

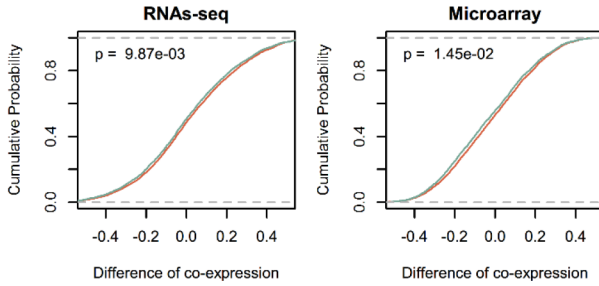

## STAT5A

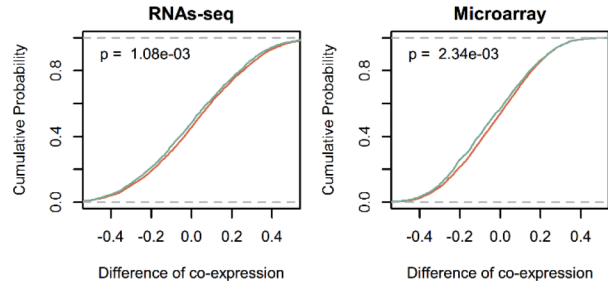

## SUZ12

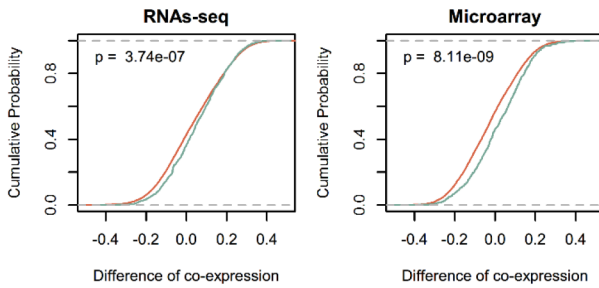

## TAF7

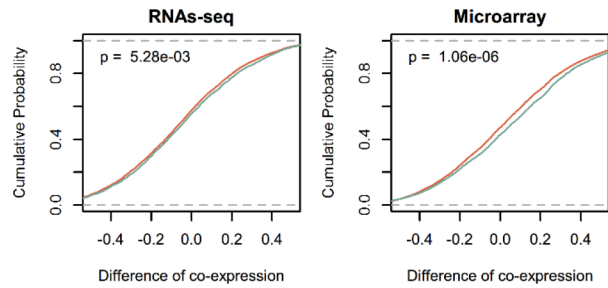

## TCF12

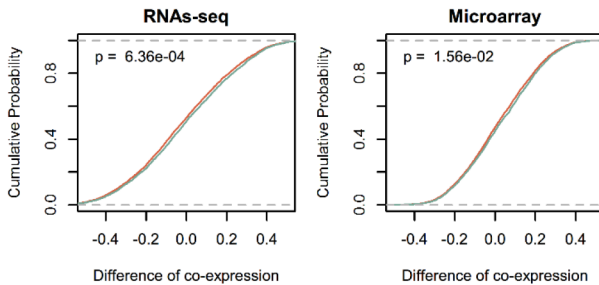

## THAP1

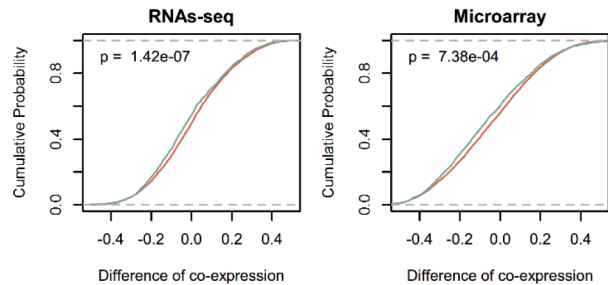

**ZKSCAN1****ZZZ3**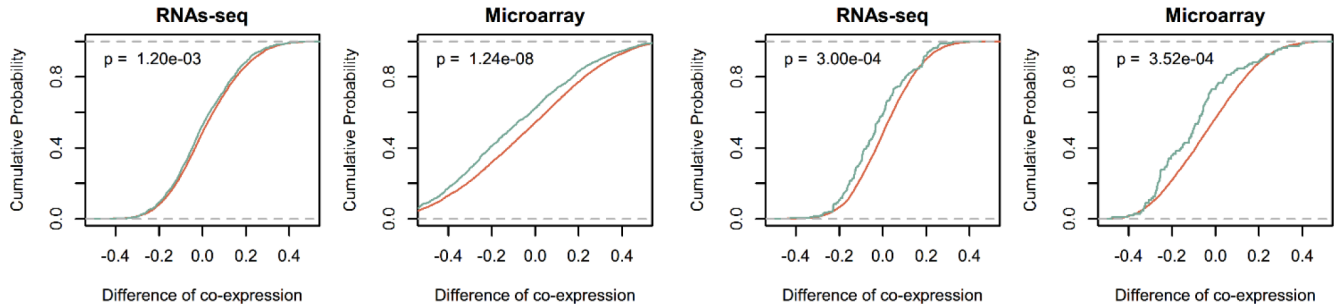

**Supplementary Figure S6: Differential coexpression of MYCN and other regulators to their co-targets.** Red and green lines denote the difference coexpression between MYCN and genes bound by MYCN as well as both MYCN and the given regulator, respectively. The  $p$  values are obtained from Kolmogorov–Smirnov test.

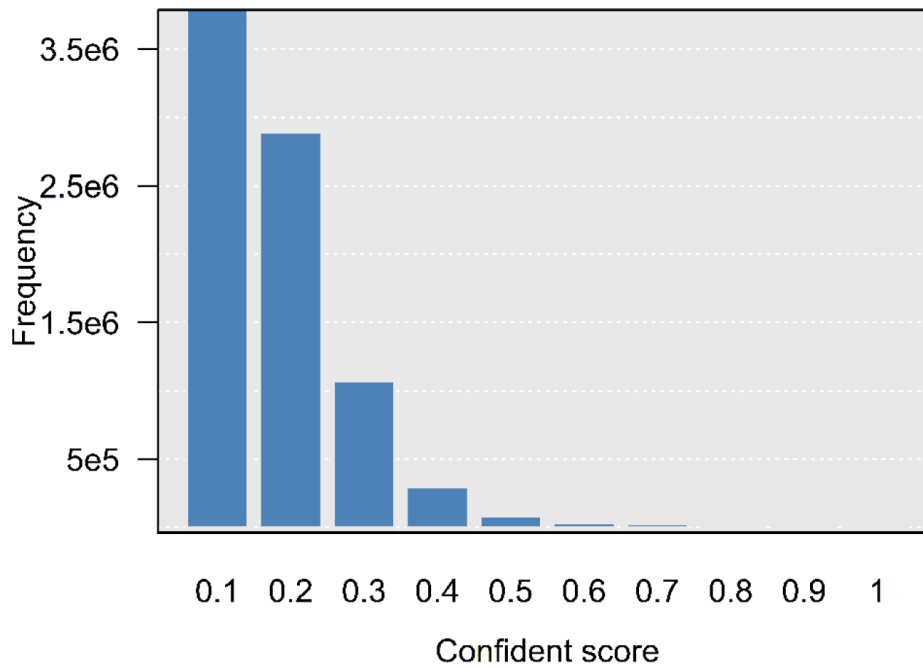

**Supplementary Figure S7: Distribution of confident score for miRNA-target relations.**

## REFERENCES

- Murphy DM, Buckley PG, Bryan K, Das S, Alcock L, Foley NH, Prenter S, Bray I, Watters KM, Higgins D, Stallings RL. Global MYCN transcription factor binding analysis in neuroblastoma reveals association with distinct E-box motifs and regions of DNA hypermethylation. *PLoS One*. 2009; 4:e8154.
- Cotterman R, Jin VX, Krig SR, Lemen JM, Wey A, Farnham PJ, Knoepfler PS. N-Myc regulates a widespread euchromatic program in the human genome partially independent of its role as a classical transcription factor. *Cancer Res*. 2008; 68:9654–9662.
- Valentijn LJ, Koster J, Haneveld F, Aissa RA, van Sluis P, Broekmans ME, Molenaar JJ, van Nes J, Versteeg R. Functional MYCN signature predicts outcome of neuroblastoma irrespective of MYCN amplification. *Proc Natl Acad Sci U S A*. 2012; 109:19190–19195.
- Lodrin M, Oehme I, Schroeder C, Milde T, Schier MC, Kopp-Schneider A, Schulte JH, Fischer M, De Preter K, Pattyn F, Castoldi M, Muckenthaler MU, Kulozik AE, et al. MYCN and HDAC2 cooperate to repress miR-183 signaling in neuroblastoma. *Nucleic Acids Res*. 2013; 41:6018–6033.
- Shohet JM, Ghosh R, Coarfa C, Ludwig A, Benham AL, Chen Z, Patterson DM, Barbieri E, Mestdagh P, Sikorski DN, Milosavljevic A, Kim ES, Gunaratne PH. A genome-wide search for promoters that respond to increased MYCN reveals both new oncogenic and tumor suppressor microRNAs associated with aggressive neuroblastoma. *Cancer Res*. 2011; 71:3841–3851.

**Supplementary Table S1: Genome-wide identification of binding sites for MYCN in neuroblastoma**

| Cell line                  | Platform  | Reference |
|----------------------------|-----------|-----------|
| Kelly, SK-N-AS, and TET21N | ChIP-chip | [1]       |
| TET21N                     | ChIP-chip | [2]       |
| IMR32                      | ChIP-chip | [3]       |
| Kelly                      | ChIP-seq  | [4]       |
| MYCN-3                     | ChIP-seq  | [5]       |

**Supplementary Table S2: MYCN-correlated genes and their correlations with other transcription factors**

**Supplementary Table S3: List of MYCN-regulated genes**

| GeneID | Symbol   | Regulation direction by MYCN | Gene Information |     |        |             | miRNA regulation                       |                        |                                                                                                                                                      |
|--------|----------|------------------------------|------------------|-----|--------|-------------|----------------------------------------|------------------------|------------------------------------------------------------------------------------------------------------------------------------------------------|
|        |          |                              | Gene type        | TF  | Kinase | Phosphotase | Number of MYCN-regulated miRNA targets | Ajusted <i>p</i> value | List of targets of MYCN-regulated miRNAs (delimited by " ")                                                                                          |
| 10347  | ABCA7    | repression                   | protein-coding   |     |        |             | 0                                      | 1.00E+00               |                                                                                                                                                      |
| 8714   | ABCC3    | repression                   | protein-coding   |     |        |             | 0                                      | 1.00E+00               |                                                                                                                                                      |
| 222166 | MTURN    | repression                   | protein-coding   |     |        |             | 10                                     | 6.87E-07               | hsa-miR-330-3p hsa-miR-24-3p hsa-miR-93-5p hsa-miR-7-5p hsa-miR-181d-5p hsa-miR-181a-5p hsa-miR-181b-5p hsa-miR-124-3p hsa-miR-27b-3p hsa-miR-27a-3p |
| 84448  | ABLIM2   | repression                   | protein-coding   |     |        |             | 1                                      | 2.48E-01               | hsa-miR-24-3p                                                                                                                                        |
| 37     | ACADVL   | repression                   | protein-coding   |     |        |             | 1                                      | 5.33E-01               | hsa-miR-124-3p                                                                                                                                       |
| 9744   | ACAP1    | repression                   | protein-coding   |     |        |             | 0                                      | 1.00E+00               |                                                                                                                                                      |
| 84320  | ACBD6    | activation                   | protein-coding   |     |        |             | 0                                      | 1.00E+00               |                                                                                                                                                      |
| 80221  | ACSF2    | repression                   | protein-coding   |     |        |             | 1                                      | 7.56E-02               | hsa-miR-24-3p                                                                                                                                        |
| 51703  | ACSL5    | repression                   | protein-coding   |     |        |             | 0                                      | 1.00E+00               |                                                                                                                                                      |
| 23305  | ACSL6    | repression                   | protein-coding   |     |        |             | 2                                      | 4.00E-01               | hsa-miR-24-3p hsa-miR-7-5p                                                                                                                           |
| 79611  | ACSS3    | repression                   | protein-coding   |     |        |             | 1                                      | 2.10E-01               | hsa-miR-124-3p                                                                                                                                       |
| 119    | ADD2     | activation                   | protein-coding   |     |        |             | 4                                      | 8.03E-02               | hsa-miR-33a-5p hsa-miR-24-3p hsa-miR-7-5p hsa-miR-760                                                                                                |
| 57211  | ADGRG6   | repression                   | protein-coding   |     |        |             | 0                                      | 1.00E+00               |                                                                                                                                                      |
| 54936  | ADPRHL2  | repression                   | protein-coding   |     |        |             | 0                                      | 1.00E+00               |                                                                                                                                                      |
| 84830  | ADTRP    | repression                   | protein-coding   |     |        |             | 0                                      | 1.00E+00               |                                                                                                                                                      |
| 2059   | EPS8     | repression                   | protein-coding   |     |        |             | 9                                      | 4.70E-06               | hsa-miR-330-3p hsa-miR-25-3p hsa-miR-181d-5p hsa-miR-181a-5p hsa-miR-181b-5p hsa-miR-124-3p hsa-miR-27a-3p hsa-miR-345-5p hsa-miR-27b-3p             |
| 191    | AHCY     | activation                   | protein-coding   |     |        |             | 0                                      | 1.00E+00               |                                                                                                                                                      |
| 196    | AHR      | repression                   | protein-coding   | Yes |        |             | 2                                      | 1.00E+00               | hsa-miR-124-3p hsa-miR-7-5p                                                                                                                          |
| 202    | AIM1     | repression                   | protein-coding   |     |        |             | 0                                      | 1.00E+00               |                                                                                                                                                      |
| 7965   | AIMP2    | activation                   | protein-coding   |     |        |             | 0                                      | 1.00E+00               |                                                                                                                                                      |
| 79647  | AKIRIN1  | repression                   | protein-coding   |     |        |             | 5                                      | 5.30E-02               | hsa-miR-181d-5p hsa-miR-27b-3p hsa-miR-27a-3p hsa-miR-181a-5p hsa-miR-181b-5p                                                                        |
| 5832   | ALDH18A1 | activation                   | protein-coding   |     |        |             | 0                                      | 1.00E+00               |                                                                                                                                                      |
| 230    | ALDOC    | repression                   | protein-coding   |     |        |             | 1                                      | 4.68E-01               | hsa-miR-7-5p                                                                                                                                         |
| 10195  | ALG3     | activation                   | protein-coding   |     |        |             | 0                                      | 1.00E+00               |                                                                                                                                                      |
| 262    | AMD1     | activation                   | protein-coding   |     |        |             | 4                                      | 6.58E-02               | hsa-miR-2110 hsa-miR-7-5p hsa-miR-27a-3p hsa-miR-27b-3p                                                                                              |
| 54522  | ANKRD16  | activation                   | protein-coding   |     |        |             | 0                                      | 1.00E+00               |                                                                                                                                                      |

|        |          |            |                |     |     |     |    |          |                                                                                                                                                                                               |
|--------|----------|------------|----------------|-----|-----|-----|----|----------|-----------------------------------------------------------------------------------------------------------------------------------------------------------------------------------------------|
| 148741 | ANKRD35  | repression | protein-coding |     |     |     | 0  | 1.00E+00 |                                                                                                                                                                                               |
| 10541  | ANP32B   | activation | protein-coding |     |     | Yes | 3  | 7.30E-02 | hsa-miR-330-3p hsa-miR-27a-3p hsa-miR-27b-3p                                                                                                                                                  |
| 301    | ANXA1    | repression | protein-coding |     |     |     | 1  | 3.76E-01 | hsa-miR-2110                                                                                                                                                                                  |
| 328    | APEX1    | activation | protein-coding | Yes |     |     | 0  | 1.00E+00 |                                                                                                                                                                                               |
| 57136  | APMAP    | repression | protein-coding |     |     |     | 0  | 1.00E+00 |                                                                                                                                                                                               |
| 1316   | KLF6     | repression | protein-coding | Yes |     |     | 9  | 4.70E-06 | hsa-miR-25-3p hsa-miR-181a-5p hsa-miR-24-3p hsa-miR-7-5p hsa-miR-181d-5p hsa-miR-181b-5p hsa-miR-124-3p hsa-miR-27a-3p hsa-miR-27b-3p                                                         |
| 5594   | MAPK1    | repression | protein-coding |     | Yes |     | 13 | 4.70E-06 | hsa-miR-2110 hsa-miR-181d-5p hsa-miR-124-3p hsa-miR-24-3p hsa-miR-93-5p hsa-miR-320a hsa-miR-27b-3p hsa-miR-330-3p hsa-miR-27a-3p hsa-miR-7-5p hsa-miR-181a-5p hsa-miR-181b-5p hsa-miR-345-5p |
| 395    | ARHGAP6  | repression | protein-coding |     |     |     | 3  | 1.63E-01 | hsa-miR-330-3p hsa-miR-320a hsa-miR-345-5p                                                                                                                                                    |
| 64333  | ARHGAP9  | repression | protein-coding |     |     |     | 0  | 1.00E+00 |                                                                                                                                                                                               |
| 84722  | PSRC1    | activation | protein-coding |     |     |     | 6  | 3.02E-05 | hsa-miR-7-5p hsa-miR-181d-5p hsa-miR-181a-5p hsa-miR-181b-5p hsa-miR-27a-3p hsa-miR-27b-3p                                                                                                    |
| 10095  | ARPC1B   | repression | protein-coding |     |     |     | 1  | 2.10E-01 | hsa-miR-124-3p                                                                                                                                                                                |
| 10092  | ARPC5    | repression | protein-coding |     |     |     | 4  | 1.38E-01 | hsa-miR-124-3p hsa-miR-93-5p hsa-miR-320a hsa-miR-330-3p                                                                                                                                      |
| 27106  | ARRDC2   | repression | protein-coding |     |     |     | 0  | 1.00E+00 |                                                                                                                                                                                               |
| 55723  | ASF1B    | activation | protein-coding |     |     |     | 1  | 6.28E-01 | hsa-miR-24-3p                                                                                                                                                                                 |
| 443    | ASPA     | repression | protein-coding |     |     |     | 1  | 2.84E-01 | hsa-miR-124-3p                                                                                                                                                                                |
| 79915  | ATAD5    | activation | protein-coding |     |     |     | 0  | 1.00E+00 |                                                                                                                                                                                               |
| 84971  | ATG4D    | activation | protein-coding |     |     |     | 0  | 1.00E+00 |                                                                                                                                                                                               |
| 471    | ATIC     | activation | protein-coding |     |     |     | 0  | 1.00E+00 |                                                                                                                                                                                               |
| 521    | ATP5I    | activation | protein-coding |     |     |     | 0  | 1.00E+00 |                                                                                                                                                                                               |
| 10159  | ATP6AP2  | repression | protein-coding |     |     |     | 0  | 1.00E+00 |                                                                                                                                                                                               |
| 535    | ATP6V0A1 | repression | protein-coding |     |     |     | 0  | 1.00E+00 |                                                                                                                                                                                               |
| 533    | ATP6V0B  | repression | protein-coding |     |     |     | 0  | 1.00E+00 |                                                                                                                                                                                               |
| 9114   | ATP6V0D1 | repression | protein-coding |     |     |     | 0  | 1.00E+00 |                                                                                                                                                                                               |
| 56674  | TMEM9B   | repression | protein-coding |     |     |     | 8  | 3.02E-05 | hsa-miR-25-3p hsa-miR-33a-5p hsa-miR-181d-5p hsa-miR-181a-5p hsa-miR-181b-5p hsa-miR-27b-3p hsa-miR-27a-3p hsa-miR-320a                                                                       |

|        |          |            |                |     |     |  |    |          |                                                                                                                                                    |
|--------|----------|------------|----------------|-----|-----|--|----|----------|----------------------------------------------------------------------------------------------------------------------------------------------------|
| 6790   | AURKA    | activation | protein-coding |     | Yes |  | 2  | 1.71E-01 | hsa-miR-25-3p hsa-miR-124-3p                                                                                                                       |
| 8705   | B3GALT4  | repression | protein-coding |     |     |  | 0  | 1.00E+00 |                                                                                                                                                    |
| 10678  | B3GNT2   | repression | protein-coding |     |     |  | 1  | 9.60E-01 | hsa-miR-124-3p                                                                                                                                     |
| 8938   | BAIAP3   | repression | protein-coding |     |     |  | 0  | 1.00E+00 |                                                                                                                                                    |
| 10538  | BATF     | repression | protein-coding | Yes |     |  | 0  | 1.00E+00 |                                                                                                                                                    |
| 11177  | BAZ1A    | activation | protein-coding | Yes |     |  | 2  | 4.89E-01 | hsa-miR-7-5p hsa-miR-320a                                                                                                                          |
| 27241  | BBS9     | repression | protein-coding |     |     |  | 0  | 1.00E+00 |                                                                                                                                                    |
| 8412   | BCAR3    | repression | protein-coding |     |     |  | 0  | 1.00E+00 |                                                                                                                                                    |
| 593    | BCKDHA   | activation | protein-coding |     |     |  | 1  | 1.72E-01 | hsa-miR-124-3p                                                                                                                                     |
| 9802   | DAZAP2   | repression | protein-coding |     |     |  | 9  | 1.07E-04 | hsa-miR-181d-5p hsa-miR-124-3p hsa-miR-7-5p hsa-miR-93-5p hsa-miR-27b-3p hsa-miR-27a-3p hsa-miR-24-3p hsa-miR-181a-5p hsa-miR-181b-5p              |
| 8678   | BECN1    | repression | protein-coding |     |     |  | 1  | 8.89E-01 | hsa-miR-93-5p                                                                                                                                      |
| 79365  | BHLHE41  | repression | protein-coding | Yes |     |  | 3  | 3.46E-01 | hsa-miR-93-5p hsa-miR-27b-3p hsa-miR-27a-3p                                                                                                        |
| 23299  | BICD2    | repression | protein-coding |     |     |  | 7  | 5.75E-02 | hsa-miR-124-3p hsa-miR-24-3p hsa-miR-93-5p hsa-miR-320a hsa-miR-330-3p hsa-miR-25-3p hsa-miR-27a-3p                                                |
| 637    | BID      | activation | protein-coding |     |     |  | 1  | 5.11E-01 | hsa-miR-124-3p                                                                                                                                     |
| 332    | BIRC5    | activation | protein-coding |     |     |  | 0  | 1.00E+00 |                                                                                                                                                    |
| 22884  | WDR37    | repression | protein-coding |     |     |  | 10 | 3.44E-04 | hsa-miR-760 hsa-miR-181d-5p hsa-miR-24-3p hsa-miR-93-5p hsa-miR-27b-3p hsa-miR-330-3p hsa-miR-25-3p hsa-miR-27a-3p hsa-miR-181a-5p hsa-miR-181b-5p |
| 91272  | BOD1     | activation | protein-coding |     |     |  | 0  | 1.00E+00 |                                                                                                                                                    |
| 23246  | BOP1     | activation | protein-coding |     |     |  | 0  | 1.00E+00 |                                                                                                                                                    |
| 54836  | BSPRY    | repression | protein-coding |     |     |  | 0  | 1.00E+00 |                                                                                                                                                    |
| 55643  | BTBD2    | activation | protein-coding |     |     |  | 1  | 2.10E-01 | hsa-miR-33a-5p                                                                                                                                     |
| 28969  | BZW2     | activation | protein-coding |     |     |  | 1  | 9.72E-01 | hsa-miR-320a                                                                                                                                       |
| 83938  | C10orf11 | repression | protein-coding |     |     |  | 0  | 1.00E+00 |                                                                                                                                                    |
| 79703  | C11orf80 | repression | protein-coding |     |     |  | 0  | 1.00E+00 |                                                                                                                                                    |
| 60686  | C14orf93 | activation | protein-coding |     |     |  | 0  | 1.00E+00 |                                                                                                                                                    |
| 84326  | C16orf13 | activation | protein-coding |     |     |  | 0  | 1.00E+00 |                                                                                                                                                    |
| 80178  | C16orf59 | activation | protein-coding |     |     |  | 1  | 2.10E-01 | hsa-miR-24-3p                                                                                                                                      |
| 90835  | C16orf93 | repression | protein-coding |     |     |  | 0  | 1.00E+00 |                                                                                                                                                    |
| 55337  | C19orf66 | repression | protein-coding |     |     |  | 0  | 1.00E+00 |                                                                                                                                                    |
| 55150  | C19orf73 | activation | protein-coding |     |     |  | 0  | 1.00E+00 |                                                                                                                                                    |
| 127687 | C1orf122 | repression | protein-coding |     |     |  | 0  | 1.00E+00 |                                                                                                                                                    |
| 54964  | C1orf56  | repression | protein-coding |     |     |  | 1  | 3.76E-01 | hsa-miR-93-5p                                                                                                                                      |
| 715    | C1R      | repression | protein-coding |     |     |  | 0  | 1.00E+00 |                                                                                                                                                    |

|        |          |            |                |     |  |  |   |          |                                                                                                                           |
|--------|----------|------------|----------------|-----|--|--|---|----------|---------------------------------------------------------------------------------------------------------------------------|
| 154313 | C6orf165 | repression | protein-coding |     |  |  | 0 | 1.00E+00 |                                                                                                                           |
| 93589  | CACNA2D4 | repression | protein-coding |     |  |  | 0 | 1.00E+00 |                                                                                                                           |
| 790    | CAD      | activation | protein-coding |     |  |  | 0 | 1.00E+00 |                                                                                                                           |
| 163688 | CALML6   | repression | protein-coding |     |  |  | 0 | 1.00E+00 |                                                                                                                           |
| 50632  | CALY     | repression | protein-coding |     |  |  | 0 | 1.00E+00 |                                                                                                                           |
| 23261  | CAMTA1   | repression | protein-coding |     |  |  | 7 | 5.09E-02 | hsa-miR-181d-5p hsa-miR-124-3p hsa-miR-93-5p hsa-miR-320a hsa-miR-25-3p hsa-miR-181a-5p hsa-miR-181b-5p                   |
| 84910  | TMEM87B  | repression | protein-coding |     |  |  | 6 | 3.48E-04 | hsa-miR-181d-5p hsa-miR-181a-5p hsa-miR-181b-5p hsa-miR-124-3p hsa-miR-27a-3p hsa-miR-27b-3p                              |
| 10487  | CAP1     | repression | protein-coding |     |  |  | 0 | 1.00E+00 |                                                                                                                           |
| 84698  | CAPS2    | repression | protein-coding |     |  |  | 1 | 4.00E-01 | hsa-miR-93-5p                                                                                                             |
| 29775  | CARD10   | repression | protein-coding |     |  |  | 1 | 5.33E-01 | hsa-miR-24-3p                                                                                                             |
| 831    | CAST     | repression | protein-coding |     |  |  | 1 | 9.48E-01 | hsa-miR-124-3p                                                                                                            |
| 875    | CBS      | activation | protein-coding |     |  |  | 0 | 1.00E+00 |                                                                                                                           |
| 200014 | CC2D1B   | repression | protein-coding | Yes |  |  | 2 | 3.23E-01 | hsa-miR-24-3p hsa-miR-124-3p                                                                                              |
| 115098 | CCDC124  | activation | protein-coding |     |  |  | 0 | 1.00E+00 |                                                                                                                           |
| 90693  | CCDC126  | repression | protein-coding |     |  |  | 0 | 1.00E+00 |                                                                                                                           |
| 57639  | CCDC146  | repression | protein-coding |     |  |  | 0 | 1.00E+00 |                                                                                                                           |
| 126075 | CCDC159  | repression | protein-coding |     |  |  | 0 | 1.00E+00 |                                                                                                                           |
| 149473 | CCDC24   | repression | protein-coding |     |  |  | 0 | 1.00E+00 |                                                                                                                           |
| 1910   | EDNRB    | repression | protein-coding |     |  |  | 8 | 5.81E-04 | hsa-miR-33a-5p hsa-miR-181d-5p hsa-miR-124-3p hsa-miR-27b-3p hsa-miR-25-3p hsa-miR-27a-3p hsa-miR-181a-5p hsa-miR-181b-5p |
| 890    | CCNA2    | activation | protein-coding |     |  |  | 2 | 3.50E-01 | hsa-miR-27a-3p hsa-miR-27b-3p                                                                                             |
| 10161  | LPAR6    | repression | protein-coding |     |  |  | 3 | 5.97E-04 | hsa-miR-27a-3p hsa-miR-24-3p hsa-miR-27b-3p                                                                               |
| 3609   | ILF3     | activation | protein-coding |     |  |  | 7 | 1.09E-03 | hsa-miR-25-3p hsa-miR-24-3p hsa-miR-181b-5p hsa-miR-7-5p hsa-miR-181d-5p hsa-miR-181a-5p hsa-miR-320a                     |
| 9236   | CCPG1    | repression | protein-coding |     |  |  | 1 | 1.00E+00 | hsa-miR-320a                                                                                                              |
| 1236   | CCR7     | repression | protein-coding |     |  |  | 1 | 7.92E-01 | hsa-miR-320a                                                                                                              |
| 27342  | RABGEF1  | repression | protein-coding |     |  |  | 6 | 1.19E-03 | hsa-miR-33a-5p hsa-miR-7-5p hsa-miR-181d-5p hsa-miR-181a-5p hsa-miR-181b-5p hsa-miR-124-3p                                |
| 8763   | CD164    | repression | protein-coding |     |  |  | 3 | 5.12E-01 | hsa-miR-124-3p hsa-miR-24-3p hsa-miR-93-5p                                                                                |
| 51293  | CD320    | activation | protein-coding |     |  |  | 0 | 1.00E+00 |                                                                                                                           |



|        |          |            |                |     |     |     |   |          |                                                                                             |
|--------|----------|------------|----------------|-----|-----|-----|---|----------|---------------------------------------------------------------------------------------------|
| 969    | CD69     | repression | protein-coding |     |     |     | 3 | 1.97E-01 | hsa-miR-25-3p hsa-miR-7-5p hsa-miR-93-5p                                                    |
| 9308   | CD83     | repression | protein-coding |     |     |     | 0 | 1.00E+00 |                                                                                             |
| 925    | CD8A     | repression | protein-coding |     |     |     | 0 | 1.00E+00 |                                                                                             |
| 928    | CD9      | repression | protein-coding |     |     |     | 0 | 1.00E+00 |                                                                                             |
| 56990  | CDC42SE2 | repression | protein-coding |     |     |     | 2 | 6.90E-01 | hsa-miR-27a-3p hsa-miR-345-5p                                                               |
| 83879  | CDCA7    | activation | protein-coding | Yes |     |     | 3 | 1.05E-01 | hsa-miR-93-5p hsa-miR-124-3p hsa-miR-320a                                                   |
| 984    | CDK11B   | repression | protein-coding |     | Yes |     | 0 | 1.00E+00 |                                                                                             |
| 81620  | CDT1     | activation | protein-coding |     |     |     | 0 | 1.00E+00 |                                                                                             |
| 9620   | CELSR1   | repression | protein-coding |     |     |     | 1 | 8.78E-01 | hsa-miR-124-3p                                                                              |
| 1062   | CENPE    | activation | protein-coding |     |     |     | 0 | 1.00E+00 |                                                                                             |
| 79019  | CENPM    | activation | protein-coding |     |     |     | 0 | 1.00E+00 |                                                                                             |
| 55839  | CENPN    | activation | protein-coding |     |     |     | 0 | 1.00E+00 |                                                                                             |
| 79682  | CENPU    | activation | protein-coding |     |     |     | 0 | 1.00E+00 |                                                                                             |
| 9731   | CEP104   | repression | protein-coding |     |     |     | 0 | 1.00E+00 |                                                                                             |
| 80217  | CFAP43   | repression | protein-coding |     |     |     | 0 | 1.00E+00 |                                                                                             |
| 8837   | CFLAR    | repression | protein-coding | Yes |     |     | 0 | 1.00E+00 |                                                                                             |
| 84952  | CGNL1    | repression | protein-coding |     |     |     | 0 | 1.00E+00 |                                                                                             |
| 10669  | CGREF1   | activation | protein-coding |     |     |     | 0 | 1.00E+00 |                                                                                             |
| 11261  | CHP1     | repression | protein-coding |     |     | Yes | 2 | 4.42E-01 | hsa-miR-7-5p hsa-miR-124-3p                                                                 |
| 10519  | CIB1     | repression | protein-coding | Yes |     |     | 0 | 1.00E+00 |                                                                                             |
| 160365 | CLECL1   | repression | protein-coding |     |     |     | 0 | 1.00E+00 |                                                                                             |
| 9022   | CLIC3    | repression | protein-coding |     |     |     | 0 | 1.00E+00 |                                                                                             |
| 11276  | SYNRG    | repression | protein-coding |     |     |     | 6 | 1.19E-03 | hsa-miR-93-5p hsa-miR-181d-5p hsa-miR-181a-5p hsa-miR-181b-5p hsa-miR-27b-3p hsa-miR-27a-3p |
| 54982  | CLN6     | activation | protein-coding |     |     |     | 0 | 1.00E+00 |                                                                                             |
| 9746   | CLSTN3   | repression | protein-coding |     |     |     | 0 | 1.00E+00 |                                                                                             |
| 1213   | CLTC     | repression | protein-coding |     |     |     | 2 | 8.78E-01 | hsa-miR-2110 hsa-miR-24-3p                                                                  |
| 84319  | CMSS1    | activation | protein-coding |     |     |     | 0 | 1.00E+00 |                                                                                             |
| 26507  | CNNM1    | activation | protein-coding |     |     |     | 2 | 4.54E-01 | hsa-miR-25-3p hsa-miR-33a-5p                                                                |
| 1690   | COCH     | activation | protein-coding |     |     |     | 0 | 1.00E+00 |                                                                                             |
| 10087  | COL4A3BP | repression | protein-coding |     |     |     | 3 | 1.21E-01 | hsa-miR-25-3p hsa-miR-7-5p hsa-miR-124-3p                                                   |
| 1286   | COL4A4   | repression | protein-coding |     |     |     | 0 | 1.00E+00 |                                                                                             |
| 10391  | CORO2B   | repression | protein-coding |     |     |     | 2 | 5.26E-01 | hsa-miR-2110 hsa-miR-93-5p                                                                  |
| 9377   | COX5A    | activation | protein-coding |     |     |     | 0 | 1.00E+00 |                                                                                             |
| 10815  | CPLX1    | activation | protein-coding |     |     |     | 0 | 1.00E+00 |                                                                                             |
| 594855 | CPLX3    | activation | protein-coding |     |     |     | 1 | 7.56E-02 | hsa-miR-24-3p                                                                               |
| 57699  | CPNE5    | repression | protein-coding |     |     |     | 1 | 2.84E-01 | hsa-miR-24-3p                                                                               |
| 51692  | CPSF3    | activation | protein-coding |     |     |     | 0 | 1.00E+00 |                                                                                             |
| 54504  | CPVL     | repression | protein-coding |     |     |     | 0 | 1.00E+00 |                                                                                             |

|        |          |            |                |     |  |  |   |          |                                                                                                           |
|--------|----------|------------|----------------|-----|--|--|---|----------|-----------------------------------------------------------------------------------------------------------|
| 119587 | CPXM2    | repression | protein-coding |     |  |  | 0 | 1.00E+00 |                                                                                                           |
| 1382   | CRABP2   | activation | protein-coding |     |  |  | 0 | 1.00E+00 |                                                                                                           |
| 148327 | CREB3L4  | activation | protein-coding | Yes |  |  | 0 | 1.00E+00 |                                                                                                           |
| 7529   | YWHAB    | repression | protein-coding |     |  |  | 7 | 1.19E-03 | hsa-miR-330-3p hsa-miR-27a-3p hsa-miR-7-5p hsa-miR-181a-5p hsa-miR-181b-5p hsa-miR-27b-3p hsa-miR-181d-5p |
| 1393   | CRHBP    | repression | protein-coding |     |  |  | 0 | 1.00E+00 |                                                                                                           |
| 200186 | CRTC2    | repression | protein-coding | Yes |  |  | 0 | 1.00E+00 |                                                                                                           |
| 1434   | CSEIL    | activation | protein-coding |     |  |  | 0 | 1.00E+00 |                                                                                                           |
| 1465   | CSRP1    | repression | protein-coding |     |  |  | 0 | 1.00E+00 |                                                                                                           |
| 1520   | CTSS     | repression | protein-coding |     |  |  | 2 | 2.89E-01 | hsa-miR-24-3p hsa-miR-93-5p                                                                               |
| 348180 | CTU2     | activation | protein-coding |     |  |  | 0 | 1.00E+00 |                                                                                                           |
| 51706  | CYB5R1   | repression | protein-coding |     |  |  | 1 | 4.29E-01 | hsa-miR-25-3p                                                                                             |
| 79901  | CYBRD1   | repression | protein-coding |     |  |  | 2 | 7.92E-01 | hsa-miR-124-3p hsa-miR-93-5p                                                                              |
| 1594   | CYP27B1  | activation | protein-coding |     |  |  | 0 | 1.00E+00 |                                                                                                           |
| 285440 | CYP4V2   | repression | protein-coding |     |  |  | 1 | 1.72E-01 | hsa-miR-124-3p                                                                                            |
| 1601   | DAB2     | repression | protein-coding |     |  |  | 3 | 2.66E-01 | hsa-miR-93-5p hsa-miR-320a hsa-miR-124-3p                                                                 |
| 26528  | DAZAP1   | activation | protein-coding |     |  |  | 2 | 1.78E-01 | hsa-miR-24-3p hsa-miR-320a                                                                                |
| 84067  | FAM160A2 | repression | protein-coding |     |  |  | 4 | 1.45E-03 | hsa-miR-25-3p hsa-miR-181d-5p hsa-miR-181a-5p hsa-miR-181b-5p                                             |
| 10926  | DBF4     | activation | protein-coding |     |  |  | 2 | 1.29E-01 | hsa-miR-330-3p hsa-miR-320a                                                                               |
| 220042 | DDIAS    | activation | protein-coding |     |  |  | 2 | 1.99E-01 | hsa-miR-93-5p hsa-miR-124-3p                                                                              |
| 1653   | DDX1     | activation | protein-coding |     |  |  | 0 | 1.00E+00 |                                                                                                           |
| 79039  | DDX54    | activation | protein-coding |     |  |  | 1 | 5.59E-01 | hsa-miR-320a                                                                                              |
| 55601  | DDX60    | repression | protein-coding |     |  |  | 0 | 1.00E+00 |                                                                                                           |
| 50619  | DEF6     | repression | protein-coding |     |  |  | 0 | 1.00E+00 |                                                                                                           |
| 79961  | DENND2D  | repression | protein-coding |     |  |  | 0 | 1.00E+00 |                                                                                                           |
| 55789  | DEPDC1B  | activation | protein-coding |     |  |  | 2 | 8.43E-02 | hsa-miR-27a-3p hsa-miR-27b-3p                                                                             |
| 1719   | DHFR     | activation | protein-coding |     |  |  | 0 | 1.00E+00 |                                                                                                           |
| 56919  | DHX33    | activation | protein-coding |     |  |  | 1 | 8.11E-01 | hsa-miR-24-3p                                                                                             |
| 79132  | DHX58    | repression | protein-coding |     |  |  | 0 | 1.00E+00 |                                                                                                           |
| 26118  | WSB1     | repression | protein-coding |     |  |  | 7 | 1.47E-03 | hsa-miR-320a hsa-miR-181d-5p hsa-miR-181a-5p hsa-miR-181b-5p hsa-miR-124-3p hsa-miR-27a-3p hsa-miR-27b-3p |
| 9077   | DIRAS3   | repression | protein-coding |     |  |  | 0 | 1.00E+00 |                                                                                                           |
| 1736   | DKC1     | activation | protein-coding |     |  |  | 0 | 1.00E+00 |                                                                                                           |
| 10683  | DLL3     | activation | protein-coding |     |  |  | 0 | 1.00E+00 |                                                                                                           |
| 1750   | DLX6     | activation | protein-coding | Yes |  |  | 1 | 8.04E-01 | hsa-miR-330-3p                                                                                            |
| 55172  | DNAAF2   | activation | protein-coding |     |  |  | 0 | 1.00E+00 |                                                                                                           |

|        |          |            |                |     |  |     |   |          |                                                                                                             |
|--------|----------|------------|----------------|-----|--|-----|---|----------|-------------------------------------------------------------------------------------------------------------|
| 7049   | TGFB3    | repression | protein-coding | Yes |  |     | 7 | 1.65E-03 | hsa-miR-330-3p hsa-miR-181a-5p hsa-miR-181d-5p hsa-miR-181b-5p hsa-miR-27b-3p hsa-miR-27a-3p hsa-miR-296-5p |
| 9829   | DNAJC6   | repression | protein-coding |     |  | Yes | 4 | 1.38E-01 | hsa-miR-181d-5p hsa-miR-27b-3p hsa-miR-27a-3p hsa-miR-181b-5p                                               |
| 8448   | DOC2A    | activation | protein-coding |     |  |     | 0 | 1.00E+00 |                                                                                                             |
| 406    | ARNTL    | repression | protein-coding | Yes |  |     | 5 | 1.70E-03 | hsa-miR-7-5p hsa-miR-760 hsa-miR-27a-3p hsa-miR-320a hsa-miR-27b-3p                                         |
| 55332  | DRAM1    | repression | protein-coding |     |  |     | 1 | 1.00E+00 | hsa-miR-124-3p                                                                                              |
| 92749  | DRC1     | repression | protein-coding |     |  |     | 0 | 1.00E+00 |                                                                                                             |
| 79075  | DSCC1    | activation | protein-coding |     |  |     | 1 | 6.28E-01 | hsa-miR-320a                                                                                                |
| 113878 | DTX2     | repression | protein-coding |     |  |     | 1 | 6.13E-01 | hsa-miR-25-3p                                                                                               |
| 1841   | DTYMK    | activation | protein-coding |     |  |     | 1 | 7.56E-02 | hsa-miR-7-5p                                                                                                |
| 56931  | DUS3L    | activation | protein-coding |     |  |     | 0 | 1.00E+00 |                                                                                                             |
| 3675   | ITGA3    | repression | protein-coding |     |  |     | 6 | 2.44E-03 | hsa-miR-24-3p hsa-miR-296-5p hsa-miR-181d-5p hsa-miR-181a-5p hsa-miR-181b-5p hsa-miR-124-3p                 |
| 54808  | DYM      | activation | protein-coding |     |  |     | 0 | 1.00E+00 |                                                                                                             |
| 1869   | E2F1     | activation | protein-coding | Yes |  |     | 3 | 1.25E-01 | hsa-miR-330-3p hsa-miR-296-5p hsa-miR-93-5p                                                                 |
| 51512  | GTSE1    | activation | protein-coding |     |  |     | 3 | 2.54E-03 | hsa-miR-181d-5p hsa-miR-181a-5p hsa-miR-181b-5p                                                             |
| 1889   | ECE1     | repression | protein-coding |     |  |     | 3 | 5.64E-02 | hsa-miR-27a-3p hsa-miR-124-3p hsa-miR-27b-3p                                                                |
| 55268  | ECHDC2   | repression | protein-coding |     |  |     | 0 | 1.00E+00 |                                                                                                             |
| 1894   | ECT2     | activation | protein-coding |     |  |     | 3 | 1.33E-01 | hsa-miR-33a-5p hsa-miR-27a-3p hsa-miR-27b-3p                                                                |
| 55629  | PNRC2    | repression | protein-coding |     |  |     | 6 | 2.54E-03 | hsa-miR-2110 hsa-miR-181d-5p hsa-miR-181a-5p hsa-miR-181b-5p hsa-miR-27a-3p hsa-miR-27b-3p                  |
| 1933   | EEF1B2   | activation | protein-coding |     |  |     | 0 | 1.00E+00 |                                                                                                             |
| 1937   | EEF1G    | activation | protein-coding |     |  |     | 0 | 1.00E+00 |                                                                                                             |
| 9813   | EFCAB14  | repression | protein-coding |     |  |     | 5 | 7.49E-02 | hsa-miR-124-3p hsa-miR-27a-3p hsa-miR-24-3p hsa-miR-93-5p hsa-miR-27b-3p                                    |
| 1978   | EIF4EBP1 | activation | protein-coding |     |  |     | 0 | 1.00E+00 |                                                                                                             |
| 1995   | ELAVL3   | activation | protein-coding |     |  |     | 1 | 1.00E+00 | hsa-miR-296-5p                                                                                              |
| 80237  | ELL3     | repression | protein-coding |     |  |     | 0 | 1.00E+00 |                                                                                                             |
| 63916  | ELMO2    | repression | protein-coding |     |  |     | 2 | 6.28E-01 | hsa-miR-24-3p hsa-miR-124-3p                                                                                |

|        |         |            |                |     |  |  |   |          |                                                                                                                                        |
|--------|---------|------------|----------------|-----|--|--|---|----------|----------------------------------------------------------------------------------------------------------------------------------------|
| 79071  | ELOVL6  | activation | protein-coding |     |  |  | 3 | 4.01E-01 | hsa-miR-320a hsa-miR-330-3p hsa-miR-25-3p                                                                                              |
| 23065  | EMC1    | repression | protein-coding |     |  |  | 1 | 7.80E-01 | hsa-miR-24-3p                                                                                                                          |
| 51016  | EMC9    | activation | protein-coding |     |  |  | 0 | 1.00E+00 |                                                                                                                                        |
| 256364 | EML3    | repression | protein-coding |     |  |  | 0 | 1.00E+00 |                                                                                                                                        |
| 2013   | EMP2    | repression | protein-coding |     |  |  | 1 | 6.86E-01 | hsa-miR-24-3p                                                                                                                          |
| 23052  | ENDOD1  | repression | protein-coding |     |  |  | 1 | 8.11E-01 | hsa-miR-124-3p                                                                                                                         |
| 2021   | ENDOG   | activation | protein-coding | Yes |  |  | 0 | 1.00E+00 |                                                                                                                                        |
| 83786  | FRMD8   | repression | protein-coding |     |  |  | 4 | 2.77E-03 | hsa-miR-124-3p hsa-miR-181d-5p hsa-miR-181a-5p hsa-miR-181b-5p                                                                         |
| 2036   | EPB41L1 | repression | protein-coding |     |  |  | 4 | 3.30E-01 | hsa-miR-33a-5p hsa-miR-27b-3p hsa-miR-330-3p hsa-miR-27a-3p                                                                            |
| 58513  | EPS15L1 | activation | protein-coding |     |  |  | 0 | 1.00E+00 |                                                                                                                                        |
| 10492  | SYNCRIP | activation | protein-coding |     |  |  | 9 | 3.04E-03 | hsa-miR-33a-5p hsa-miR-181d-5p hsa-miR-124-3p hsa-miR-93-5p hsa-miR-320a hsa-miR-27b-3p hsa-miR-27a-3p hsa-miR-181a-5p hsa-miR-181b-5p |
| 51752  | ERAP1   | repression | protein-coding |     |  |  | 3 | 2.16E-01 | hsa-miR-330-3p hsa-miR-33a-5p hsa-miR-93-5p                                                                                            |
| 55914  | ERBB2IP | repression | protein-coding |     |  |  | 3 | 7.69E-01 | hsa-miR-33a-5p hsa-miR-93-5p hsa-miR-25-3p                                                                                             |
| 11228  | RASSF8  | repression | protein-coding |     |  |  | 7 | 4.04E-03 | hsa-miR-33a-5p hsa-miR-181d-5p hsa-miR-124-3p hsa-miR-320a hsa-miR-27b-3p hsa-miR-181a-5p hsa-miR-181b-5p                              |
| 5547   | PRCP    | repression | protein-coding |     |  |  | 4 | 4.51E-03 | hsa-miR-7-5p hsa-miR-181d-5p hsa-miR-181a-5p hsa-miR-181b-5p                                                                           |
| 157570 | ESCO2   | activation | protein-coding |     |  |  | 1 | 6.86E-01 | hsa-miR-24-3p                                                                                                                          |
| 2120   | ETV6    | repression | protein-coding | Yes |  |  | 0 | 1.00E+00 |                                                                                                                                        |
| 51513  | ETV7    | repression | protein-coding | Yes |  |  | 0 | 1.00E+00 |                                                                                                                                        |
| 56915  | EXOSC5  | activation | protein-coding |     |  |  | 0 | 1.00E+00 |                                                                                                                                        |
| 3995   | FADS3   | repression | protein-coding |     |  |  | 1 | 7.56E-02 | hsa-miR-7-5p                                                                                                                           |
| 114625 | ERMAP   | repression | protein-coding |     |  |  | 3 | 4.72E-03 | hsa-miR-181d-5p hsa-miR-181a-5p hsa-miR-181b-5p                                                                                        |
| 63901  | FAM111A | repression | protein-coding |     |  |  | 0 | 1.00E+00 |                                                                                                                                        |
| 5863   | RGL2    | repression | protein-coding |     |  |  | 3 | 4.72E-03 | hsa-miR-27a-3p hsa-miR-24-3p hsa-miR-27b-3p                                                                                            |
| 84908  | FAM136A | activation | protein-coding |     |  |  | 0 | 1.00E+00 |                                                                                                                                        |
| 135892 | TRIM50  | repression | protein-coding |     |  |  | 2 | 4.82E-03 | hsa-miR-27a-3p hsa-miR-27b-3p                                                                                                          |
| 85395  | FAM207A | activation | protein-coding |     |  |  | 0 | 1.00E+00 |                                                                                                                                        |
| 127281 | FAM213B | repression | protein-coding |     |  |  | 0 | 1.00E+00 |                                                                                                                                        |

|        |          |            |                |     |     |  |   |          |                                                                          |
|--------|----------|------------|----------------|-----|-----|--|---|----------|--------------------------------------------------------------------------|
| 29902  | FAM216A  | activation | protein-coding |     |     |  | 0 | 1.00E+00 |                                                                          |
| 10447  | FAM3C    | repression | protein-coding |     |     |  | 4 | 6.06E-02 | hsa-miR-181a-5p hsa-miR-93-5p hsa-miR-181d-5p hsa-miR-181b-5p            |
| 58516  | FAM60A   | activation | protein-coding |     |     |  | 1 | 1.00E+00 | hsa-miR-93-5p                                                            |
| 54478  | FAM64A   | activation | protein-coding |     |     |  | 1 | 3.18E-01 | hsa-miR-330-3p                                                           |
| 9750   | FAM65B   | repression | protein-coding |     |     |  | 2 | 2.58E-01 | hsa-miR-27a-3p hsa-miR-27b-3p                                            |
| 138311 | FAM69B   | activation | protein-coding |     |     |  | 1 | 2.10E-01 | hsa-miR-320a                                                             |
| 728833 | FAM72D   | activation | protein-coding |     |     |  | 0 | 1.00E+00 |                                                                          |
| 374986 | FAM73A   | repression | protein-coding |     |     |  | 0 | 1.00E+00 |                                                                          |
| 50618  | ITSN2    | repression | protein-coding |     |     |  | 5 | 5.22E-03 | hsa-miR-93-5p hsa-miR-320a hsa-miR-124-3p hsa-miR-27b-3p hsa-miR-27a-3p  |
| 81610  | FAM83D   | activation | protein-coding |     |     |  | 0 | 1.00E+00 |                                                                          |
| 2177   | FANCD2   | activation | protein-coding |     |     |  | 0 | 1.00E+00 |                                                                          |
| 92565  | FANK1    | repression | protein-coding |     |     |  | 0 | 1.00E+00 |                                                                          |
| 84108  | PCGF6    | activation | protein-coding | Yes |     |  | 5 | 5.64E-03 | hsa-miR-25-3p hsa-miR-7-5p hsa-miR-93-5p hsa-miR-181a-5p hsa-miR-181b-5p |
| 2194   | FASN     | activation | protein-coding |     |     |  | 0 | 1.00E+00 |                                                                          |
| 5583   | PRKCH    | repression | protein-coding |     | Yes |  | 4 | 5.98E-03 | hsa-miR-24-3p hsa-miR-93-5p hsa-miR-27a-3p hsa-miR-27b-3p                |
| 2091   | FBL      | activation | protein-coding |     |     |  | 0 | 1.00E+00 |                                                                          |
| 26273  | FBXO3    | repression | protein-coding |     |     |  | 3 | 1.45E-01 | hsa-miR-330-3p hsa-miR-7-5p hsa-miR-124-3p                               |
| 54455  | FBXO42   | repression | protein-coding |     |     |  | 0 | 1.00E+00 |                                                                          |
| 51060  | TXNDC12  | repression | protein-coding |     |     |  | 4 | 5.98E-03 | hsa-miR-24-3p hsa-miR-181d-5p hsa-miR-181a-5p hsa-miR-181b-5p            |
| 26268  | FBXO9    | repression | protein-coding |     |     |  | 2 | 4.68E-01 | hsa-miR-33a-5p hsa-miR-93-5p                                             |
| 26127  | FGFR1OP2 | repression | protein-coding |     |     |  | 1 | 4.89E-01 | hsa-miR-24-3p                                                            |
| 24147  | FJX1     | activation | protein-coding |     |     |  | 2 | 5.26E-01 | hsa-miR-93-5p hsa-miR-320a                                               |
| 2286   | FKBP2    | repression | protein-coding |     |     |  | 0 | 1.00E+00 |                                                                          |
| 2288   | FKBP4    | activation | protein-coding |     |     |  | 0 | 1.00E+00 |                                                                          |
| 51661  | FKBP7    | activation | protein-coding |     |     |  | 0 | 1.00E+00 |                                                                          |
| 11328  | FKBP9    | repression | protein-coding |     |     |  | 0 | 1.00E+00 |                                                                          |
| 80308  | FLAD1    | activation | protein-coding |     |     |  | 1 | 1.27E-01 | hsa-miR-7-5p                                                             |
| 55640  | FLVCR2   | repression | protein-coding |     |     |  | 0 | 1.00E+00 |                                                                          |
| 55810  | FOXJ2    | repression | protein-coding | Yes |     |  | 3 | 4.94E-01 | hsa-miR-7-5p hsa-miR-93-5p hsa-miR-330-3p                                |
| 2305   | FOXM1    | activation | protein-coding | Yes |     |  | 1 | 7.05E-01 | hsa-miR-320a                                                             |
| 2308   | FOXO1    | repression | protein-coding | Yes |     |  | 4 | 3.17E-01 | hsa-miR-320a hsa-miR-27b-3p hsa-miR-330-3p hsa-miR-27a-3p                |
| 8790   | FPGT     | repression | protein-coding |     |     |  | 0 | 1.00E+00 |                                                                          |

|        |           |            |                |     |     |  |   |          |                                                                                            |
|--------|-----------|------------|----------------|-----|-----|--|---|----------|--------------------------------------------------------------------------------------------|
| 6249   | CLIP1     | repression | protein-coding |     |     |  | 6 | 7.15E-03 | hsa-miR-330-3p hsa-miR-7-5p hsa-miR-181d-5p hsa-miR-181a-5p hsa-miR-181b-5p hsa-miR-124-3p |
| 10272  | FSTL3     | repression | protein-coding |     |     |  | 1 | 5.59E-01 | hsa-miR-296-5p                                                                             |
| 24140  | FTSJ1     | activation | protein-coding |     |     |  | 0 | 1.00E+00 |                                                                                            |
| 282969 | FUOM      | repression | protein-coding |     |     |  | 0 | 1.00E+00 |                                                                                            |
| 2521   | FUS       | activation | protein-coding |     |     |  | 1 | 3.76E-01 | hsa-miR-320a                                                                               |
| 23710  | GABARAPL1 | repression | protein-coding |     |     |  | 0 | 1.00E+00 |                                                                                            |
| 1647   | GADD45A   | repression | protein-coding |     |     |  | 0 | 1.00E+00 |                                                                                            |
| 10634  | GAS2L1    | repression | protein-coding |     |     |  | 2 | 1.03E-01 | hsa-miR-124-3p hsa-miR-760                                                                 |
| 60674  | GAS5      | activation | ncRNA          |     |     |  | 0 | 1.00E+00 |                                                                                            |
| 54815  | GATAD2A   | activation | protein-coding | Yes |     |  | 3 | 6.61E-02 | hsa-miR-124-3p hsa-miR-27a-3p hsa-miR-27b-3p                                               |
| 2628   | GATM      | repression | protein-coding |     |     |  | 3 | 2.32E-01 | hsa-miR-181a-5p hsa-miR-181d-5p hsa-miR-181b-5p                                            |
| 2642   | GCGR      | repression | protein-coding |     |     |  | 0 | 1.00E+00 |                                                                                            |
| 2672   | GFI1      | repression | protein-coding | Yes |     |  | 0 | 1.00E+00 |                                                                                            |
| 51659  | GINS2     | activation | protein-coding |     |     |  | 0 | 1.00E+00 |                                                                                            |
| 10052  | GJC1      | activation | protein-coding |     |     |  | 5 | 5.72E-02 | hsa-miR-124-3p hsa-miR-24-3p hsa-miR-27b-3p hsa-miR-27a-3p hsa-miR-7-5p                    |
| 8833   | GMPS      | activation | protein-coding |     |     |  | 0 | 1.00E+00 |                                                                                            |
| 2768   | GNA12     | repression | protein-coding |     |     |  | 1 | 7.80E-01 | hsa-miR-7-5p                                                                               |
| 2782   | GNB1      | repression | protein-coding |     |     |  | 0 | 1.00E+00 |                                                                                            |
| 10399  | GNB2L1    | activation | protein-coding |     |     |  | 0 | 1.00E+00 |                                                                                            |
| 55970  | GNG12     | repression | protein-coding |     |     |  | 2 | 1.00E+00 | hsa-miR-27b-3p hsa-miR-27a-3p                                                              |
| 26354  | GNL3      | activation | protein-coding |     |     |  | 0 | 1.00E+00 |                                                                                            |
| 84572  | GNPTG     | repression | protein-coding |     |     |  | 0 | 1.00E+00 |                                                                                            |
| 2806   | GOT2      | activation | protein-coding |     |     |  | 3 | 8.58E-02 | hsa-miR-181b-5p hsa-miR-181d-5p hsa-miR-181a-5p                                            |
| 10243  | GPHN      | activation | protein-coding |     |     |  | 1 | 8.11E-01 | hsa-miR-330-3p                                                                             |
| 81491  | GPR63     | activation | protein-coding |     |     |  | 1 | 8.11E-01 | hsa-miR-93-5p                                                                              |
| 2874   | GPS2      | repression | protein-coding |     |     |  | 0 | 1.00E+00 |                                                                                            |
| 160622 | GRASP     | repression | protein-coding |     |     |  | 0 | 1.00E+00 |                                                                                            |
| 83903  | GSG2      | activation | protein-coding |     | Yes |  | 0 | 1.00E+00 |                                                                                            |
| 9567   | GTPBP1    | activation | protein-coding |     |     |  | 1 | 8.78E-01 | hsa-miR-24-3p                                                                              |
| 51422  | PRKAG2    | repression | protein-coding |     |     |  | 6 | 7.15E-03 | hsa-miR-7-5p hsa-miR-181a-5p hsa-miR-181b-5p hsa-miR-320a hsa-miR-124-3p hsa-miR-181d-5p   |
| 8971   | H1FX      | activation | protein-coding |     |     |  | 0 | 1.00E+00 |                                                                                            |
| 55506  | H2AFY2    | activation | protein-coding |     |     |  | 0 | 1.00E+00 |                                                                                            |
| 93323  | HAUS8     | activation | protein-coding |     |     |  | 1 | 6.13E-01 | hsa-miR-93-5p                                                                              |
| 3049   | HBQ1      | activation | protein-coding |     |     |  | 0 | 1.00E+00 |                                                                                            |

|        |          |            |                |     |     |     |   |          |                                                                                                                         |
|--------|----------|------------|----------------|-----|-----|-----|---|----------|-------------------------------------------------------------------------------------------------------------------------|
| 3068   | HDGF     | activation | protein-coding |     |     |     | 1 | 1.00E+00 | hsa-miR-345-5p                                                                                                          |
| 65009  | NDRG4    | repression | protein-coding |     |     |     | 5 | 8.06E-03 | hsa-miR-24-3p hsa-miR-760 hsa-miR-181d-5p hsa-miR-181a-5p hsa-miR-181b-5p                                               |
| 3280   | HES1     | repression | protein-coding | Yes |     |     | 0 | 1.00E+00 |                                                                                                                         |
| 3087   | HHEX     | repression | protein-coding | Yes |     |     | 0 | 1.00E+00 |                                                                                                                         |
| 4853   | NOTCH2   | repression | protein-coding | Yes |     |     | 8 | 8.12E-03 | hsa-miR-181d-5p hsa-miR-124-3p hsa-miR-7-5p hsa-miR-93-5p hsa-miR-27b-3p hsa-miR-27a-3p hsa-miR-181a-5p hsa-miR-181b-5p |
| 80201  | HKDC1    | repression | protein-coding |     |     |     | 0 | 1.00E+00 |                                                                                                                         |
| 3106   | HLA-B    | repression | protein-coding |     |     |     | 0 | 1.00E+00 |                                                                                                                         |
| 3113   | HLA-DPA1 | repression | protein-coding |     |     |     | 0 | 1.00E+00 |                                                                                                                         |
| 3167   | HMX2     | activation | protein-coding | Yes |     |     | 0 | 1.00E+00 |                                                                                                                         |
| 10949  | HNRNPA0  | activation | protein-coding |     |     |     | 0 | 1.00E+00 |                                                                                                                         |
| 220988 | HNRNPA3  | activation | protein-coding |     |     |     | 1 | 1.00E+00 | hsa-miR-33a-5p                                                                                                          |
| 9987   | HNRNPDL  | activation | protein-coding |     |     |     | 1 | 1.00E+00 | hsa-miR-330-3p                                                                                                          |
| 3201   | HOXA4    | repression | protein-coding | Yes |     |     | 0 | 1.00E+00 |                                                                                                                         |
| 3232   | HOXD3    | activation | protein-coding | Yes |     |     | 0 | 1.00E+00 |                                                                                                                         |
| 84842  | HPDL     | activation | protein-coding |     |     |     | 0 | 1.00E+00 |                                                                                                                         |
| 11255  | HRH3     | activation | protein-coding |     |     |     | 0 | 1.00E+00 |                                                                                                                         |
| 3313   | HSPA9    | activation | protein-coding |     |     |     | 0 | 1.00E+00 |                                                                                                                         |
| 26353  | HSPB8    | repression | protein-coding |     |     |     | 1 | 4.00E-01 | hsa-miR-124-3p                                                                                                          |
| 3336   | HSPE1    | activation | protein-coding |     |     |     | 0 | 1.00E+00 |                                                                                                                         |
| 81888  | HY1      | repression | protein-coding |     |     |     | 0 | 1.00E+00 |                                                                                                                         |
| 23125  | CAMTA2   | repression | protein-coding | Yes |     |     | 4 | 8.19E-03 | hsa-miR-93-5p hsa-miR-181d-5p hsa-miR-181a-5p hsa-miR-181b-5p                                                           |
| 3383   | ICAM1    | repression | protein-coding | Yes |     |     | 0 | 1.00E+00 |                                                                                                                         |
| 25900  | IFFO1    | repression | protein-coding |     |     |     | 0 | 1.00E+00 |                                                                                                                         |
| 80212  | CCDC92   | repression | protein-coding |     |     |     | 3 | 8.22E-03 | hsa-miR-181d-5p hsa-miR-181a-5p hsa-miR-181b-5p                                                                         |
| 57549  | IGSF9    | activation | protein-coding |     |     |     | 0 | 1.00E+00 |                                                                                                                         |
| 3597   | IL13RA1  | repression | protein-coding |     |     |     | 4 | 5.48E-02 | hsa-miR-330-3p hsa-miR-7-5p hsa-miR-27a-3p hsa-miR-27b-3p                                                               |
| 55707  | NECAP2   | repression | protein-coding |     |     |     | 3 | 8.22E-03 | hsa-miR-124-3p hsa-miR-27b-3p hsa-miR-27a-3p                                                                            |
| 50615  | IL21R    | repression | protein-coding |     |     |     | 1 | 2.10E-01 | hsa-miR-24-3p                                                                                                           |
| 9235   | IL32     | repression | protein-coding |     |     |     | 0 | 1.00E+00 |                                                                                                                         |
| 3570   | IL6R     | repression | protein-coding |     |     |     | 2 | 4.68E-01 | hsa-miR-7-5p hsa-miR-124-3p                                                                                             |
| 5464   | PPA1     | activation | protein-coding |     |     | Yes | 3 | 8.22E-03 | hsa-miR-27a-3p hsa-miR-320a hsa-miR-27b-3p                                                                              |
| 3611   | ILK      | repression | protein-coding |     | Yes |     | 0 | 1.00E+00 |                                                                                                                         |

|        |           |            |                |     |     |  |   |          |                                                                             |
|--------|-----------|------------|----------------|-----|-----|--|---|----------|-----------------------------------------------------------------------------|
| 11313  | LYPLA2    | repression | protein-coding |     |     |  | 5 | 8.33E-03 | hsa-miR-24-3p hsa-miR-296-5p hsa-miR-181a-5p hsa-miR-181b-5p hsa-miR-27b-3p |
| 9657   | IQCB1     | activation | protein-coding |     |     |  | 0 | 1.00E+00 |                                                                             |
| 8826   | IQGAP1    | repression | protein-coding |     |     |  | 4 | 5.65E-02 | hsa-miR-24-3p hsa-miR-7-5p hsa-miR-2110 hsa-miR-124-3p                      |
| 10955  | SERINC3   | repression | protein-coding |     |     |  | 5 | 8.91E-03 | hsa-miR-330-3p hsa-miR-33a-5p hsa-miR-27a-3p hsa-miR-320a hsa-miR-27b-3p    |
| 10745  | PHTF1     | repression | protein-coding | Yes |     |  | 2 | 9.45E-03 | hsa-miR-27a-3p hsa-miR-27b-3p                                               |
| 3679   | ITGA7     | repression | protein-coding |     |     |  | 1 | 2.48E-01 | hsa-miR-124-3p                                                              |
| 3687   | ITGAX     | repression | protein-coding |     |     |  | 0 | 1.00E+00 |                                                                             |
| 3689   | ITGB2     | repression | protein-coding | Yes |     |  | 0 | 1.00E+00 |                                                                             |
| 150771 | ITPRIPL1  | activation | protein-coding |     |     |  | 0 | 1.00E+00 |                                                                             |
| 10826  | FAXDC2    | repression | protein-coding |     |     |  | 3 | 9.66E-03 | hsa-miR-124-3p hsa-miR-27a-3p hsa-miR-27b-3p                                |
| 9767   | JADE3     | activation | protein-coding |     |     |  | 1 | 1.00E+00 | hsa-miR-7-5p                                                                |
| 84522  | JAGN1     | activation | protein-coding |     |     |  | 0 | 1.00E+00 |                                                                             |
| 3716   | JAK1      | repression | protein-coding |     | Yes |  | 1 | 1.00E+00 | hsa-miR-93-5p                                                               |
| 8629   | JRK       | activation | protein-coding |     |     |  | 0 | 1.00E+00 |                                                                             |
| 3726   | JUNB      | repression | protein-coding | Yes |     |  | 0 | 1.00E+00 |                                                                             |
| 10300  | KATNB1    | activation | protein-coding |     |     |  | 1 | 4.55E-01 | hsa-miR-24-3p                                                               |
| 8514   | KCNAB2    | repression | protein-coding |     |     |  | 0 | 1.00E+00 |                                                                             |
| 115207 | KCTD12    | repression | protein-coding |     |     |  | 5 | 1.55E-01 | hsa-miR-33a-5p hsa-miR-24-3p hsa-miR-296-5p hsa-miR-27b-3p hsa-miR-27a-3p   |
| 23081  | KDM4C     | repression | protein-coding |     |     |  | 2 | 2.48E-01 | hsa-miR-27a-3p hsa-miR-27b-3p                                               |
| 9817   | KEAP1     | activation | protein-coding | Yes |     |  | 0 | 1.00E+00 |                                                                             |
| 79932  | KIAA0319L | repression | protein-coding |     |     |  | 2 | 2.48E-01 | hsa-miR-27a-3p hsa-miR-27b-3p                                               |
| 57456  | KIAA1143  | activation | protein-coding |     |     |  | 1 | 4.68E-01 | hsa-miR-7-5p                                                                |
| 56243  | KIAA1217  | repression | protein-coding |     |     |  | 2 | 6.45E-01 | hsa-miR-7-5p hsa-miR-320a                                                   |
| 56992  | KIF15     | activation | protein-coding |     |     |  | 0 | 1.00E+00 |                                                                             |
| 130271 | PLEKHH2   | repression | protein-coding |     |     |  | 5 | 9.92E-03 | hsa-miR-25-3p hsa-miR-24-3p hsa-miR-7-5p hsa-miR-27a-3p hsa-miR-27b-3p      |
| 64782  | AEN       | activation | protein-coding |     |     |  | 4 | 1.08E-02 | hsa-miR-93-5p hsa-miR-27a-3p hsa-miR-320a hsa-miR-27b-3p                    |
| 3833   | KIFC1     | activation | protein-coding |     |     |  | 0 | 1.00E+00 |                                                                             |
| 90990  | KIFC2     | repression | protein-coding |     |     |  | 0 | 1.00E+00 |                                                                             |
| 9365   | KL        | repression | protein-coding |     |     |  | 4 | 8.30E-02 | hsa-miR-33a-5p hsa-miR-181d-5p hsa-miR-181a-5p hsa-miR-181b-5p              |



|        |         |            |                |     |     |  |  |   |          |                                                                              |
|--------|---------|------------|----------------|-----|-----|--|--|---|----------|------------------------------------------------------------------------------|
| 688    | KLF5    | repression | protein-coding | Yes |     |  |  | 3 | 3.35E-01 | hsa-miR-25-3p hsa-miR-320a hsa-miR-124-3p                                    |
| 4189   | DNAJB9  | repression | protein-coding |     |     |  |  | 5 | 1.08E-02 | hsa-miR-25-3p hsa-miR-27b-3p hsa-miR-93-5p hsa-miR-124-3p hsa-miR-27a-3p     |
| 79786  | KLHL36  | repression | protein-coding |     |     |  |  | 1 | 3.76E-01 | hsa-miR-320a                                                                 |
| 57563  | KLHL8   | activation | protein-coding |     |     |  |  | 1 | 8.89E-01 | hsa-miR-124-3p                                                               |
| 23633  | KPNA6   | repression | protein-coding |     |     |  |  | 5 | 2.39E-01 | hsa-miR-124-3p hsa-miR-24-3p hsa-miR-27b-3p hsa-miR-27a-3p hsa-miR-7-5p      |
| 144811 | LACC1   | repression | protein-coding |     |     |  |  | 0 | 1.00E+00 |                                                                              |
| 114294 | LACTB   | repression | protein-coding |     |     |  |  | 1 | 6.28E-01 | hsa-miR-33a-5p                                                               |
| 3909   | LAMA3   | repression | protein-coding |     |     |  |  | 1 | 5.98E-01 | hsa-miR-93-5p                                                                |
| 3916   | LAMP1   | repression | protein-coding |     |     |  |  | 2 | 2.39E-01 | hsa-miR-93-5p hsa-miR-320a                                                   |
| 3927   | LASP1   | repression | protein-coding |     |     |  |  | 5 | 5.72E-02 | hsa-miR-24-3p hsa-miR-93-5p hsa-miR-27b-3p hsa-miR-27a-3p hsa-miR-7-5p       |
| 26524  | LATS2   | repression | protein-coding |     | Yes |  |  | 4 | 1.69E-01 | hsa-miR-93-5p hsa-miR-27b-3p hsa-miR-25-3p hsa-miR-27a-3p                    |
| 3932   | LCK     | repression | protein-coding |     | Yes |  |  | 0 | 1.00E+00 |                                                                              |
| 3937   | LCP2    | repression | protein-coding |     |     |  |  | 0 | 1.00E+00 |                                                                              |
| 8861   | LDB1    | activation | protein-coding | Yes |     |  |  | 0 | 1.00E+00 |                                                                              |
| 26119  | LDLRAP1 | repression | protein-coding |     |     |  |  | 3 | 6.61E-02 | hsa-miR-93-5p hsa-miR-124-3p hsa-miR-320a                                    |
| 51176  | LEF1    | repression | protein-coding | Yes |     |  |  | 2 | 6.54E-01 | hsa-miR-93-5p hsa-miR-320a                                                   |
| 3953   | LEPR    | repression | protein-coding |     |     |  |  | 2 | 3.02E-01 | hsa-miR-24-3p hsa-miR-320a                                                   |
| 10186  | LHFP    | repression | protein-coding |     |     |  |  | 2 | 2.89E-01 | hsa-miR-27a-3p hsa-miR-27b-3p                                                |
| 3980   | LIG3    | activation | protein-coding |     |     |  |  | 0 | 1.00E+00 |                                                                              |
| 1326   | MAP3K8  | repression | protein-coding |     | Yes |  |  | 5 | 1.08E-02 | hsa-miR-93-5p hsa-miR-181a-5p hsa-miR-181b-5p hsa-miR-124-3p hsa-miR-181d-5p |
| 55788  | LMBRD1  | repression | protein-coding |     |     |  |  | 1 | 4.68E-01 | hsa-miR-7-5p                                                                 |
| 84823  | LMNB2   | activation | protein-coding |     |     |  |  | 2 | 6.45E-02 | hsa-miR-24-3p hsa-miR-760                                                    |
| 57121  | LPAR5   | repression | protein-coding |     |     |  |  | 0 | 1.00E+00 |                                                                              |
| 57326  | PBXIP1  | repression | protein-coding | Yes |     |  |  | 3 | 1.08E-02 | hsa-miR-27b-3p hsa-miR-27a-3p hsa-miR-24-3p                                  |
| 10162  | LPCAT3  | repression | protein-coding |     |     |  |  | 1 | 7.24E-01 | hsa-miR-124-3p                                                               |
| 26018  | LRIG1   | repression | protein-coding |     |     |  |  | 2 | 6.13E-01 | hsa-miR-93-5p hsa-miR-124-3p                                                 |
| 83450  | LRRC48  | repression | protein-coding |     |     |  |  | 0 | 1.00E+00 |                                                                              |
| 149499 | LRRC71  | repression | protein-coding |     |     |  |  | 0 | 1.00E+00 |                                                                              |

|        |          |            |                |     |     |  |   |          |                                                                                                          |
|--------|----------|------------|----------------|-----|-----|--|---|----------|----------------------------------------------------------------------------------------------------------|
| 50999  | TMED5    | repression | protein-coding |     |     |  | 7 | 1.08E-02 | hsa-miR-33a-5p hsa-miR-27a-3p hsa-miR-93-5p hsa-miR-27b-3p hsa-miR-25-3p hsa-miR-181a-5p hsa-miR-181b-5p |
| 57633  | LRRN1    | activation | protein-coding |     |     |  | 1 | 5.98E-01 | hsa-miR-181b-5p                                                                                          |
| 84967  | LSM10    | repression | protein-coding |     |     |  | 1 | 7.56E-02 | hsa-miR-24-3p                                                                                            |
| 57819  | LSM2     | activation | protein-coding |     |     |  | 0 | 1.00E+00 |                                                                                                          |
| 27258  | LSM3     | activation | protein-coding |     |     |  | 0 | 1.00E+00 |                                                                                                          |
| 25804  | LSM4     | activation | protein-coding |     |     |  | 0 | 1.00E+00 |                                                                                                          |
| 51690  | LSM7     | activation | protein-coding |     |     |  | 0 | 1.00E+00 |                                                                                                          |
| 7940   | LST1     | repression | protein-coding |     |     |  | 0 | 1.00E+00 |                                                                                                          |
| 4050   | LTB      | repression | protein-coding |     |     |  | 0 | 1.00E+00 |                                                                                                          |
| 10006  | ABI1     | repression | protein-coding |     |     |  | 6 | 1.08E-02 | hsa-miR-33a-5p hsa-miR-181d-5p hsa-miR-93-5p hsa-miR-25-3p hsa-miR-181a-5p hsa-miR-181b-5p               |
| 11127  | KIF3A    | repression | protein-coding |     |     |  | 6 | 1.08E-02 | hsa-miR-181d-5p hsa-miR-124-3p hsa-miR-27b-3p hsa-miR-27a-3p hsa-miR-181a-5p hsa-miR-181b-5p             |
| 4869   | NPM1     | activation | protein-coding | Yes |     |  | 5 | 1.08E-02 | hsa-miR-33a-5p hsa-miR-93-5p hsa-miR-181d-5p hsa-miR-181a-5p hsa-miR-181b-5p                             |
| 28992  | MACROD1  | activation | protein-coding |     |     |  | 0 | 1.00E+00 |                                                                                                          |
| 4121   | MAN1A1   | repression | protein-coding |     |     |  | 3 | 3.35E-01 | hsa-miR-25-3p hsa-miR-7-5p hsa-miR-320a                                                                  |
| 57134  | MAN1C1   | repression | protein-coding |     |     |  | 1 | 9.60E-01 | hsa-miR-93-5p                                                                                            |
| 23324  | MAN2B2   | repression | protein-coding |     |     |  | 0 | 1.00E+00 |                                                                                                          |
| 4130   | MAP1A    | repression | protein-coding |     |     |  | 2 | 4.68E-01 | hsa-miR-24-3p hsa-miR-2110                                                                               |
| 84557  | MAP1LC3A | repression | protein-coding |     |     |  | 0 | 1.00E+00 |                                                                                                          |
| 7786   | MAP3K12  | repression | protein-coding |     | Yes |  | 1 | 8.25E-01 | hsa-miR-93-5p                                                                                            |
| 4217   | MAP3K5   | repression | protein-coding |     | Yes |  | 1 | 1.00E+00 | hsa-miR-93-5p                                                                                            |
| 7357   | UGCG     | repression | protein-coding |     |     |  | 4 | 1.08E-02 | hsa-miR-93-5p hsa-miR-27b-3p hsa-miR-27a-3p hsa-miR-320a                                                 |
| 377    | ARF3     | repression | protein-coding |     |     |  | 7 | 1.12E-02 | hsa-miR-181d-5p hsa-miR-7-5p hsa-miR-27b-3p hsa-miR-320a hsa-miR-181a-5p hsa-miR-181b-5p hsa-miR-27a-3p  |
| 10982  | MAPRE2   | repression | protein-coding |     |     |  | 2 | 9.05E-01 | hsa-miR-7-5p hsa-miR-330-3p                                                                              |
| 115123 | MARCH3   | repression | protein-coding |     |     |  | 1 | 8.04E-01 | hsa-miR-124-3p                                                                                           |
| 4150   | MAZ      | activation | protein-coding | Yes |     |  | 1 | 8.49E-01 | hsa-miR-7-5p                                                                                             |
| 4171   | MCM2     | activation | protein-coding |     |     |  | 0 | 1.00E+00 |                                                                                                          |
| 4176   | MCM7     | activation | protein-coding |     |     |  | 0 | 1.00E+00 |                                                                                                          |
| 84515  | MCM8     | activation | protein-coding | Yes |     |  | 0 | 1.00E+00 |                                                                                                          |
| 255231 | MCOLN2   | repression | protein-coding |     |     |  | 1 | 4.68E-01 | hsa-miR-25-3p                                                                                            |

|        |         |            |                |     |     |  |   |          |                                                                                                        |
|--------|---------|------------|----------------|-----|-----|--|---|----------|--------------------------------------------------------------------------------------------------------|
| 79772  | MCTP1   | repression | protein-coding |     |     |  | 0 | 1.00E+00 |                                                                                                        |
| 4193   | MDM2    | activation | protein-coding | Yes |     |  | 1 | 5.98E-01 | hsa-miR-25-3p                                                                                          |
| 64769  | MEAF6   | repression | protein-coding |     |     |  | 3 | 1.72E-01 | hsa-miR-181a-5p hsa-miR-181b-5p hsa-miR-124-3p                                                         |
| 79006  | METR1   | repression | protein-coding |     |     |  | 0 | 1.00E+00 |                                                                                                        |
| 891    | CCNB1   | activation | protein-coding |     |     |  | 4 | 1.12E-02 | hsa-miR-93-5p hsa-miR-181d-5p hsa-miR-181a-5p hsa-miR-181b-5p                                          |
| 399664 | MEX3D   | activation | protein-coding |     |     |  | 2 | 4.89E-01 | hsa-miR-93-5p hsa-miR-320a                                                                             |
| 9927   | MFN2    | repression | protein-coding |     |     |  | 1 | 1.00E+00 | hsa-miR-93-5p                                                                                          |
| 64747  | MFSD1   | repression | protein-coding |     |     |  | 0 | 1.00E+00 |                                                                                                        |
| 79778  | MICALL2 | repression | protein-coding |     |     |  | 0 | 1.00E+00 |                                                                                                        |
| 57708  | MIER1   | repression | protein-coding |     |     |  | 3 | 8.48E-01 | hsa-miR-7-5p hsa-miR-320a hsa-miR-25-3p                                                                |
| 4282   | MIF     | activation | protein-coding |     |     |  | 0 | 1.00E+00 |                                                                                                        |
| 10643  | IGF2BP3 | activation | protein-coding |     |     |  | 7 | 1.12E-02 | hsa-miR-2110 hsa-miR-320a hsa-miR-27b-3p hsa-miR-330-3p hsa-miR-27a-3p hsa-miR-181a-5p hsa-miR-181b-5p |
| 197259 | MLKL    | repression | protein-coding |     | Yes |  | 0 | 1.00E+00 |                                                                                                        |
| 4343   | MOV10   | repression | protein-coding |     |     |  | 0 | 1.00E+00 |                                                                                                        |
| 255027 | MPV17L  | activation | protein-coding |     |     |  | 0 | 1.00E+00 |                                                                                                        |
| 6182   | MRPL12  | activation | protein-coding |     |     |  | 0 | 1.00E+00 |                                                                                                        |
| 29088  | MRPL15  | activation | protein-coding |     |     |  | 0 | 1.00E+00 |                                                                                                        |
| 11222  | MRPL3   | activation | protein-coding |     |     |  | 0 | 1.00E+00 |                                                                                                        |
| 51073  | MRPL4   | activation | protein-coding |     |     |  | 1 | 2.10E-01 | hsa-miR-24-3p                                                                                          |
| 65080  | MRPL44  | activation | protein-coding |     |     |  | 0 | 1.00E+00 |                                                                                                        |
| 51642  | MRPL48  | activation | protein-coding |     |     |  | 1 | 3.46E-01 | hsa-miR-7-5p                                                                                           |
| 51116  | MRPS2   | activation | protein-coding |     |     |  | 0 | 1.00E+00 |                                                                                                        |
| 9112   | MTA1    | activation | protein-coding | Yes |     |  | 0 | 1.00E+00 |                                                                                                        |
| 23787  | MTCH1   | repression | protein-coding |     |     |  | 0 | 1.00E+00 |                                                                                                        |
| 51001  | MTERF3  | activation | protein-coding |     |     |  | 0 | 1.00E+00 |                                                                                                        |
| 4520   | MTF1    | repression | protein-coding | Yes |     |  | 2 | 6.13E-01 | hsa-miR-93-5p hsa-miR-124-3p                                                                           |
| 25902  | MTHFD1L | activation | protein-coding |     |     |  | 1 | 3.18E-01 | hsa-miR-181d-5p                                                                                        |
| 10797  | MTHFD2  | activation | protein-coding |     |     |  | 3 | 1.25E-01 | hsa-miR-25-3p hsa-miR-7-5p hsa-miR-33a-5p                                                              |
| 4524   | MTHFR   | repression | protein-coding |     |     |  | 1 | 1.00E+00 | hsa-miR-24-3p                                                                                          |
| 84206  | MEX3B   | activation | protein-coding |     |     |  | 5 | 1.12E-02 | hsa-miR-181d-5p hsa-miR-181a-5p hsa-miR-181b-5p hsa-miR-320a hsa-miR-27b-3p                            |
| 79594  | MUL1    | repression | protein-coding |     |     |  | 1 | 3.76E-01 | hsa-miR-181d-5p                                                                                        |
| 93343  | MVB12A  | activation | protein-coding |     |     |  | 0 | 1.00E+00 |                                                                                                        |
| 9961   | MVP     | repression | protein-coding |     |     |  | 0 | 1.00E+00 |                                                                                                        |
| 4605   | MYBL2   | activation | protein-coding | Yes |     |  | 0 | 1.00E+00 |                                                                                                        |
| 84073  | MYCBPAP | repression | protein-coding |     |     |  | 0 | 1.00E+00 |                                                                                                        |

|           |         |            |                |     |     |  |   |          |                                                                                                                                 |
|-----------|---------|------------|----------------|-----|-----|--|---|----------|---------------------------------------------------------------------------------------------------------------------------------|
| 57644     | MYH7B   | repression | protein-coding |     |     |  | 0 | 1.00E+00 |                                                                                                                                 |
| 4641      | MYO1C   | repression | protein-coding |     |     |  | 1 | 1.00E+00 | hsa-miR-330-3p                                                                                                                  |
| 55930     | MYO5C   | repression | protein-coding |     |     |  | 1 | 8.49E-01 | hsa-miR-93-5p                                                                                                                   |
| 100820829 | MYZAP   | repression | protein-coding | Yes |     |  | 0 | 1.00E+00 |                                                                                                                                 |
| 653784    | MZT2A   | activation | protein-coding |     |     |  | 0 | 1.00E+00 |                                                                                                                                 |
| 8883      | NAE1    | activation | protein-coding |     |     |  | 0 | 1.00E+00 |                                                                                                                                 |
| 222236    | NAPEPLD | repression | protein-coding |     |     |  | 2 | 8.01E-01 | hsa-miR-124-3p hsa-miR-93-5p                                                                                                    |
| 79731     | NARS2   | activation | protein-coding |     |     |  | 0 | 1.00E+00 |                                                                                                                                 |
| 284565    | NBPF15  | repression | protein-coding |     |     |  | 1 | 4.68E-01 | hsa-miR-124-3p                                                                                                                  |
| 64151     | NCAPG   | activation | protein-coding |     |     |  | 0 | 1.00E+00 |                                                                                                                                 |
| 23154     | NCDN    | repression | protein-coding |     |     |  | 0 | 1.00E+00 |                                                                                                                                 |
| 4691      | NCL     | activation | protein-coding |     |     |  | 2 | 1.12E-01 | hsa-miR-760 hsa-miR-181a-5p                                                                                                     |
| 4774      | NFIA    | repression | protein-coding | Yes |     |  | 7 | 1.12E-02 | hsa-miR-33a-5p hsa-miR-124-3p hsa-miR-27a-3p hsa-miR-7-5p hsa-miR-320a hsa-miR-27b-3p hsa-miR-25-3p                             |
| 8509      | NDST2   | repression | protein-coding |     |     |  | 1 | 5.98E-01 | hsa-miR-24-3p                                                                                                                   |
| 4731      | NDUFV3  | activation | protein-coding |     |     |  | 0 | 1.00E+00 |                                                                                                                                 |
| 204851    | HIPK1   | repression | protein-coding |     | Yes |  | 9 | 1.19E-02 | hsa-miR-33a-5p hsa-miR-320a hsa-miR-124-3p hsa-miR-24-3p hsa-miR-296-5p hsa-miR-93-5p hsa-miR-330-3p hsa-miR-25-3p hsa-miR-7-5p |
| 26271     | FBXO5   | activation | protein-coding |     |     |  | 3 | 1.32E-02 | hsa-miR-181d-5p hsa-miR-181a-5p hsa-miR-181b-5p                                                                                 |
| 79858     | NEK11   | repression | protein-coding |     | Yes |  | 0 | 1.00E+00 |                                                                                                                                 |
| 81831     | NETO2   | activation | protein-coding |     |     |  | 3 | 6.13E-01 | hsa-miR-93-5p hsa-miR-27b-3p hsa-miR-27a-3p                                                                                     |
| 4779      | NFE2L1  | repression | protein-coding | Yes |     |  | 2 | 4.63E-01 | hsa-miR-330-3p hsa-miR-124-3p                                                                                                   |
| 8809      | IL18R1  | repression | protein-coding |     |     |  | 2 | 1.32E-02 | hsa-miR-27a-3p hsa-miR-27b-3p                                                                                                   |
| 4794      | NFKBIE  | repression | protein-coding | Yes |     |  | 1 | 2.48E-01 | hsa-miR-24-3p                                                                                                                   |
| 9054      | NFS1    | repression | protein-coding |     |     |  | 0 | 1.00E+00 |                                                                                                                                 |
| 1389      | CREBL2  | repression | protein-coding | Yes |     |  | 7 | 1.38E-02 | hsa-miR-181d-5p hsa-miR-24-3p hsa-miR-27b-3p hsa-miR-330-3p hsa-miR-181a-5p hsa-miR-181b-5p hsa-miR-27a-3p                      |
| 4830      | NME1    | activation | protein-coding |     |     |  | 0 | 1.00E+00 |                                                                                                                                 |
| 4831      | NME2    | activation | protein-coding | Yes |     |  | 0 | 1.00E+00 |                                                                                                                                 |
| 28987     | NOB1    | activation | protein-coding |     |     |  | 0 | 1.00E+00 |                                                                                                                                 |
| 10392     | NOD1    | repression | protein-coding | Yes |     |  | 2 | 1.29E-01 | hsa-miR-27b-3p hsa-miR-27a-3p                                                                                                   |
| 8602      | NOP14   | activation | protein-coding |     |     |  | 0 | 1.00E+00 |                                                                                                                                 |

|        |         |            |                |     |  |     |   |          |                                                                                             |
|--------|---------|------------|----------------|-----|--|-----|---|----------|---------------------------------------------------------------------------------------------|
| 81669  | CCNL2   | repression | protein-coding |     |  |     | 4 | 1.39E-02 | hsa-miR-330-3p hsa-miR-27a-3p hsa-miR-320a hsa-miR-27b-3p                                   |
| 148252 | DIRAS1  | activation | protein-coding |     |  |     | 4 | 1.39E-02 | hsa-miR-7-5p hsa-miR-296-5p hsa-miR-27a-3p hsa-miR-27b-3p                                   |
| 8131   | NPRL3   | activation | protein-coding |     |  |     | 0 | 1.00E+00 |                                                                                             |
| 4886   | NPY1R   | repression | protein-coding |     |  |     | 0 | 1.00E+00 |                                                                                             |
| 4835   | NQO2    | repression | protein-coding |     |  |     | 0 | 1.00E+00 |                                                                                             |
| 6641   | SNTB1   | repression | protein-coding |     |  |     | 4 | 1.39E-02 | hsa-miR-25-3p hsa-miR-24-3p hsa-miR-93-5p hsa-miR-320a                                      |
| 3084   | NRG1    | repression | protein-coding |     |  |     | 1 | 1.00E+00 | hsa-miR-124-3p                                                                              |
| 4913   | NTHL1   | activation | protein-coding | Yes |  |     | 0 | 1.00E+00 |                                                                                             |
| 55190  | NUDT11  | activation | protein-coding |     |  | Yes | 1 | 1.00E+00 | hsa-miR-7-5p                                                                                |
| 119369 | NUDT9P1 | repression | pseudo         |     |  |     | 0 | 1.00E+00 |                                                                                             |
| 51686  | OAZ3    | repression | protein-coding |     |  |     | 1 | 2.48E-01 | hsa-miR-25-3p                                                                               |
| 132299 | OCIAD2  | activation | protein-coding |     |  |     | 0 | 1.00E+00 |                                                                                             |
| 4953   | ODC1    | activation | protein-coding |     |  |     | 0 | 1.00E+00 |                                                                                             |
| 93145  | OLFM2   | activation | protein-coding |     |  |     | 0 | 1.00E+00 |                                                                                             |
| 4985   | OPRD1   | activation | protein-coding | Yes |  |     | 0 | 1.00E+00 |                                                                                             |
| 93129  | ORA13   | repression | protein-coding | Yes |  |     | 0 | 1.00E+00 |                                                                                             |
| 23594  | ORC6    | activation | protein-coding | Yes |  |     | 0 | 1.00E+00 |                                                                                             |
| 5734   | PTGER4  | repression | protein-coding |     |  |     | 5 | 1.57E-02 | hsa-miR-25-3p hsa-miR-24-3p hsa-miR-93-5p hsa-miR-27b-3p hsa-miR-27a-3p                     |
| 127700 | OSCP1   | repression | protein-coding |     |  |     | 0 | 1.00E+00 |                                                                                             |
| 55214  | P3H2    | repression | protein-coding |     |  |     | 0 | 1.00E+00 |                                                                                             |
| 8974   | P4HA2   | repression | protein-coding |     |  |     | 1 | 8.11E-01 | hsa-miR-124-3p                                                                              |
| 10606  | PAICS   | activation | protein-coding |     |  |     | 0 | 1.00E+00 |                                                                                             |
| 51025  | PAM16   | activation | protein-coding |     |  |     | 0 | 1.00E+00 |                                                                                             |
| 344838 | PAQR9   | activation | protein-coding |     |  |     | 3 | 8.58E-02 | hsa-miR-124-3p hsa-miR-27a-3p hsa-miR-27b-3p                                                |
| 54625  | PARP14  | repression | protein-coding |     |  |     | 1 | 7.80E-01 | hsa-miR-124-3p                                                                              |
| 51696  | HECA    | repression | protein-coding |     |  |     | 6 | 1.61E-02 | hsa-miR-33a-5p hsa-miR-181d-5p hsa-miR-93-5p hsa-miR-320a hsa-miR-181a-5p hsa-miR-181b-5p   |
| 10336  | PCGF3   | activation | protein-coding |     |  |     | 6 | 7.17E-02 | hsa-miR-93-5p hsa-miR-320a hsa-miR-27b-3p hsa-miR-330-3p hsa-miR-25-3p hsa-miR-27a-3p       |
| 5471   | PPAT    | activation | protein-coding |     |  |     | 4 | 1.62E-02 | hsa-miR-25-3p hsa-miR-7-5p hsa-miR-27a-3p hsa-miR-27b-3p                                    |
| 23608  | MKRN1   | repression | protein-coding |     |  |     | 6 | 1.65E-02 | hsa-miR-33a-5p hsa-miR-181d-5p hsa-miR-93-5p hsa-miR-330-3p hsa-miR-181a-5p hsa-miR-181b-5p |

|        |         |            |                |     |     |     |  |   |          |                                                                                                                                          |
|--------|---------|------------|----------------|-----|-----|-----|--|---|----------|------------------------------------------------------------------------------------------------------------------------------------------|
| 5111   | PCNA    | activation | protein-coding | Yes |     |     |  | 0 | 1.00E+00 |                                                                                                                                          |
| 8682   | PEA15   | repression | protein-coding |     |     |     |  | 2 | 7.89E-01 | hsa-miR-124-3p hsa-miR-24-3p                                                                                                             |
| 4804   | NGFR    | repression | protein-coding |     |     |     |  | 4 | 1.69E-02 | hsa-miR-760 hsa-miR-296-5p hsa-miR-27a-3p hsa-miR-27b-3p                                                                                 |
| 5195   | PEX14   | repression | protein-coding | Yes |     |     |  | 0 | 1.00E+00 |                                                                                                                                          |
| 5217   | PFN2    | activation | protein-coding |     |     |     |  | 3 | 5.00E-01 | hsa-miR-33a-5p hsa-miR-7-5p hsa-miR-93-5p                                                                                                |
| 116154 | PHACTR3 | activation | protein-coding |     |     | Yes |  | 0 | 1.00E+00 |                                                                                                                                          |
| 148479 | PHF13   | repression | protein-coding |     |     |     |  | 2 | 3.81E-01 | hsa-miR-27a-3p hsa-miR-27b-3p                                                                                                            |
| 112885 | PHF21B  | activation | protein-coding |     |     |     |  | 0 | 1.00E+00 |                                                                                                                                          |
| 8863   | PER3    | repression | protein-coding |     |     |     |  | 4 | 1.69E-02 | hsa-miR-181d-5p hsa-miR-181a-5p hsa-miR-181b-5p hsa-miR-124-3p                                                                           |
| 254295 | PHYHD1  | repression | protein-coding |     |     |     |  | 0 | 1.00E+00 |                                                                                                                                          |
| 51604  | PIGT    | repression | protein-coding |     |     |     |  | 0 | 1.00E+00 |                                                                                                                                          |
| 57095  | PITHD1  | repression | protein-coding |     |     |     |  | 2 | 1.48E-01 | hsa-miR-27a-3p hsa-miR-27b-3p                                                                                                            |
| 9600   | PITPNM1 | repression | protein-coding |     |     |     |  | 0 | 1.00E+00 |                                                                                                                                          |
| 57510  | XPO5    | activation | protein-coding |     |     |     |  | 4 | 1.69E-02 | hsa-miR-24-3p hsa-miR-124-3p hsa-miR-27a-3p hsa-miR-27b-3p                                                                               |
| 11142  | PKIG    | repression | protein-coding |     |     |     |  | 0 | 1.00E+00 |                                                                                                                                          |
| 9088   | PKMYT1  | activation | protein-coding |     | Yes |     |  | 2 | 7.19E-02 | hsa-miR-24-3p hsa-miR-93-5p                                                                                                              |
| 11145  | PLA2G16 | repression | protein-coding |     |     |     |  | 0 | 1.00E+00 |                                                                                                                                          |
| 51316  | PLAC8   | repression | protein-coding |     |     |     |  | 0 | 1.00E+00 |                                                                                                                                          |
| 5331   | PLCB3   | repression | protein-coding |     |     |     |  | 0 | 1.00E+00 |                                                                                                                                          |
| 55344  | PLCXD1  | activation | protein-coding |     |     |     |  | 0 | 1.00E+00 |                                                                                                                                          |
| 201164 | PLD6    | activation | protein-coding |     |     |     |  | 0 | 1.00E+00 |                                                                                                                                          |
| 79666  | PLEKHF2 | repression | protein-coding |     |     |     |  | 1 | 1.00E+00 | hsa-miR-124-3p                                                                                                                           |
| 57449  | PLEKHG5 | repression | protein-coding |     |     |     |  | 0 | 1.00E+00 |                                                                                                                                          |
| 2908   | NR3C1   | repression | protein-coding | Yes |     |     |  | 9 | 1.82E-02 | hsa-miR-181d-5p hsa-miR-124-3p hsa-miR-92a-1-5p hsa-miR-93-5p hsa-miR-27b-3p hsa-miR-27a-3p hsa-miR-320a hsa-miR-181a-5p hsa-miR-181b-5p |
| 9842   | PLEKHM1 | repression | protein-coding |     |     |     |  | 3 | 1.90E-01 | hsa-miR-25-3p hsa-miR-93-5p hsa-miR-760                                                                                                  |
| 80301  | PLEKHO2 | repression | protein-coding |     |     |     |  | 1 | 8.89E-01 | hsa-miR-93-5p                                                                                                                            |
| 5347   | PLK1    | activation | protein-coding |     | Yes |     |  | 0 | 1.00E+00 |                                                                                                                                          |
| 57088  | PLSCR4  | repression | protein-coding |     |     |     |  | 3 | 1.90E-01 | hsa-miR-330-3p hsa-miR-93-5p hsa-miR-124-3p                                                                                              |
| 84898  | PLXDC2  | repression | protein-coding |     |     |     |  | 0 | 1.00E+00 |                                                                                                                                          |
| 10154  | PLXNC1  | repression | protein-coding |     |     |     |  | 1 | 9.48E-01 | hsa-miR-320a                                                                                                                             |
| 5376   | PMP22   | repression | protein-coding |     |     |     |  | 0 | 1.00E+00 |                                                                                                                                          |

|        |         |            |                |     |     |     |   |          |                                                                                              |
|--------|---------|------------|----------------|-----|-----|-----|---|----------|----------------------------------------------------------------------------------------------|
| 57104  | PNPLA2  | repression | protein-coding |     |     |     | 1 | 3.76E-01 | hsa-miR-124-3p                                                                               |
| 50640  | PNPLA8  | repression | protein-coding |     |     |     | 0 | 1.00E+00 |                                                                                              |
| 113402 | SFT2D1  | repression | protein-coding |     |     |     | 3 | 1.82E-02 | hsa-miR-181d-5p hsa-miR-181a-5p hsa-miR-181b-5p                                              |
| 5424   | POLD1   | activation | protein-coding |     |     |     | 0 | 1.00E+00 |                                                                                              |
| 5427   | POLE2   | activation | protein-coding |     |     |     | 0 | 1.00E+00 |                                                                                              |
| 54107  | POLE3   | activation | protein-coding |     |     |     | 3 | 1.21E-01 | hsa-miR-330-3p hsa-miR-7-5p hsa-miR-320a                                                     |
| 5437   | POLR2H  | activation | protein-coding | Yes |     |     | 0 | 1.00E+00 |                                                                                              |
| 5438   | POLR2I  | activation | protein-coding | Yes |     |     | 0 | 1.00E+00 |                                                                                              |
| 661    | POLR3D  | activation | protein-coding |     |     |     | 1 | 8.49E-01 | hsa-miR-24-3p                                                                                |
| 84265  | POLR3GL | repression | protein-coding |     |     |     | 0 | 1.00E+00 |                                                                                              |
| 51728  | POLR3K  | activation | protein-coding |     |     |     | 0 | 1.00E+00 |                                                                                              |
| 10585  | POMT1   | repression | protein-coding |     |     |     | 0 | 1.00E+00 |                                                                                              |
| 6566   | SLC16A1 | activation | protein-coding |     |     |     | 5 | 1.82E-02 | hsa-miR-33a-5p hsa-miR-320a hsa-miR-124-3p hsa-miR-27a-3p hsa-miR-27b-3p                     |
| 10248  | POP7    | activation | protein-coding |     |     |     | 0 | 1.00E+00 |                                                                                              |
| 2065   | ERBB3   | repression | protein-coding |     | Yes |     | 5 | 1.91E-02 | hsa-miR-27a-3p hsa-miR-24-3p hsa-miR-93-5p hsa-miR-124-3p hsa-miR-27b-3p                     |
| 8611   | PPAP2A  | repression | protein-coding |     |     | Yes | 1 | 4.68E-01 | hsa-miR-93-5p                                                                                |
| 5467   | PPARD   | repression | protein-coding | Yes |     |     | 1 | 8.49E-01 | hsa-miR-24-3p                                                                                |
| 9493   | KIF23   | activation | protein-coding |     |     |     | 4 | 1.91E-02 | hsa-miR-330-3p hsa-miR-7-5p hsa-miR-93-5p hsa-miR-320a                                       |
| 8495   | PPFIBP2 | repression | protein-coding |     |     |     | 1 | 3.46E-01 | hsa-miR-124-3p                                                                               |
| 5525   | PPP2R5A | repression | protein-coding |     |     | Yes | 0 | 1.00E+00 |                                                                                              |
| 5526   | PPP2R5B | repression | protein-coding |     |     | Yes | 1 | 4.00E-01 | hsa-miR-296-5p                                                                               |
| 6856   | SYPL1   | repression | protein-coding |     |     |     | 5 | 2.24E-02 | hsa-miR-25-3p hsa-miR-181a-5p hsa-miR-181d-5p hsa-miR-181b-5p hsa-miR-124-3p                 |
| 7799   | PRDM2   | repression | protein-coding | Yes |     |     | 2 | 1.00E+00 | hsa-miR-33a-5p hsa-miR-93-5p                                                                 |
| 7001   | PRDX2   | activation | protein-coding |     |     |     | 0 | 1.00E+00 |                                                                                              |
| 10549  | PRDX4   | activation | protein-coding |     |     |     | 0 | 1.00E+00 |                                                                                              |
| 5550   | PREP    | activation | protein-coding |     |     |     | 1 | 4.00E-01 | hsa-miR-27a-3p                                                                               |
| 8987   | STBD1   | repression | protein-coding |     |     |     | 3 | 2.68E-02 | hsa-miR-93-5p hsa-miR-27a-3p hsa-miR-27b-3p                                                  |
| 9867   | PJA2    | repression | protein-coding |     |     |     | 6 | 2.69E-02 | hsa-miR-33a-5p hsa-miR-181d-5p hsa-miR-27b-3p hsa-miR-27a-3p hsa-miR-181a-5p hsa-miR-181b-5p |
| 5590   | PRKCZ   | repression | protein-coding |     | Yes |     | 0 | 1.00E+00 |                                                                                              |
| 5613   | PRKX    | activation | protein-coding |     | Yes |     | 3 | 7.91E-02 | hsa-miR-124-3p hsa-miR-27b-3p hsa-miR-27a-3p                                                 |
| 3276   | PRMT1   | activation | protein-coding |     |     |     | 0 | 1.00E+00 |                                                                                              |
| 3275   | PRMT2   | repression | protein-coding | Yes |     |     | 1 | 7.56E-02 | hsa-miR-7-5p                                                                                 |

|        |         |            |                |     |     |     |   |          |                                                                                                           |
|--------|---------|------------|----------------|-----|-----|-----|---|----------|-----------------------------------------------------------------------------------------------------------|
| 29968  | PSAT1   | activation | protein-coding |     |     |     | 0 | 1.00E+00 |                                                                                                           |
| 84249  | PSD2    | repression | protein-coding |     |     |     | 0 | 1.00E+00 |                                                                                                           |
| 286826 | LIN9    | activation | protein-coding |     |     |     | 4 | 2.77E-02 | hsa-miR-33a-5p hsa-miR-7-5p hsa-miR-27a-3p hsa-miR-27b-3p                                                 |
| 9051   | PSTPIP1 | repression | protein-coding |     |     |     | 0 | 1.00E+00 |                                                                                                           |
| 5730   | PTGDS   | repression | protein-coding |     |     |     | 0 | 1.00E+00 |                                                                                                           |
| 23678  | SGK3    | repression | protein-coding |     | Yes |     | 5 | 2.86E-02 | hsa-miR-25-3p hsa-miR-7-5p hsa-miR-181d-5p hsa-miR-181a-5p hsa-miR-181b-5p                                |
| 5757   | PTMA    | activation | protein-coding |     |     |     | 0 | 1.00E+00 |                                                                                                           |
| 8073   | PTP4A2  | repression | protein-coding |     |     | Yes | 2 | 4.68E-01 | hsa-miR-7-5p hsa-miR-93-5p                                                                                |
| 5782   | PTPN12  | repression | protein-coding |     |     | Yes | 2 | 6.13E-01 | hsa-miR-320a hsa-miR-124-3p                                                                               |
| 5784   | PTPN14  | repression | protein-coding |     |     | Yes | 0 | 1.00E+00 |                                                                                                           |
| 26191  | PTPN22  | repression | protein-coding |     |     | Yes | 0 | 1.00E+00 |                                                                                                           |
| 5777   | PTPN6   | repression | protein-coding |     |     | Yes | 0 | 1.00E+00 |                                                                                                           |
| 5792   | PTPRF   | repression | protein-coding |     |     | Yes | 1 | 1.00E+00 | hsa-miR-24-3p                                                                                             |
| 284119 | PTRF    | repression | protein-coding | Yes |     |     | 1 | 8.25E-01 | hsa-miR-24-3p                                                                                             |
| 10744  | PTTG2   | activation | protein-coding |     |     |     | 0 | 1.00E+00 |                                                                                                           |
| 54517  | PUS7    | activation | protein-coding |     |     |     | 3 | 7.08E-02 | hsa-miR-25-3p hsa-miR-124-3p hsa-miR-320a                                                                 |
| 221749 | PXDC1   | repression | protein-coding |     |     |     | 0 | 1.00E+00 |                                                                                                           |
| 5829   | PXN     | repression | protein-coding |     |     |     | 2 | 2.66E-01 | hsa-miR-2110 hsa-miR-7-5p                                                                                 |
| 5831   | PYCR1   | activation | protein-coding |     |     |     | 0 | 1.00E+00 |                                                                                                           |
| 5837   | PYGM    | repression | protein-coding |     |     |     | 0 | 1.00E+00 |                                                                                                           |
| 5862   | RAB2A   | repression | protein-coding |     |     |     | 1 | 8.04E-01 | hsa-miR-124-3p                                                                                            |
| 326624 | RAB37   | repression | protein-coding |     |     |     | 0 | 1.00E+00 |                                                                                                           |
| 5865   | RAB3B   | repression | protein-coding |     |     |     | 0 | 1.00E+00 |                                                                                                           |
| 339122 | RAB43   | repression | protein-coding |     |     |     | 1 | 8.25E-01 | hsa-miR-760                                                                                               |
| 51762  | RAB8B   | repression | protein-coding |     |     |     | 7 | 7.56E-02 | hsa-miR-181a-5p hsa-miR-181d-5p hsa-miR-27a-3p hsa-miR-93-5p hsa-miR-27b-3p hsa-miR-25-3p hsa-miR-181b-5p |
| 8320   | EOMES   | repression | protein-coding | Yes |     |     | 3 | 2.89E-02 | hsa-miR-330-3p hsa-miR-25-3p hsa-miR-124-3p                                                               |
| 55684  | RABL6   | activation | protein-coding |     |     |     | 0 | 1.00E+00 |                                                                                                           |
| 25788  | RAD54B  | activation | protein-coding |     |     |     | 0 | 1.00E+00 |                                                                                                           |
| 5899   | RALB    | repression | protein-coding |     |     |     | 0 | 1.00E+00 |                                                                                                           |
| 5902   | RANBP1  | activation | protein-coding |     |     |     | 0 | 1.00E+00 |                                                                                                           |
| 10411  | RAPGEF3 | repression | protein-coding |     |     |     | 1 | 3.46E-01 | hsa-miR-25-3p                                                                                             |
| 83937  | RASSF4  | repression | protein-coding |     |     |     | 0 | 1.00E+00 |                                                                                                           |
| 83593  | RASSF5  | repression | protein-coding |     |     |     | 4 | 5.30E-02 | hsa-miR-27b-3p hsa-miR-93-5p hsa-miR-124-3p hsa-miR-27a-3p                                                |
| 8045   | RASSF7  | repression | protein-coding |     |     |     | 0 | 1.00E+00 |                                                                                                           |



|        |          |            |                |     |  |  |   |          |                                                                                          |
|--------|----------|------------|----------------|-----|--|--|---|----------|------------------------------------------------------------------------------------------|
| 9885   | OSBPL2   | repression | protein-coding |     |  |  | 4 | 2.89E-02 | hsa-miR-93-5p hsa-miR-181d-5p hsa-miR-181a-5p hsa-miR-181b-5p                            |
| 125950 | RAVER1   | activation | protein-coding |     |  |  | 1 | 7.92E-01 | hsa-miR-124-3p                                                                           |
| 388403 | YPEL2    | repression | protein-coding |     |  |  | 6 | 3.30E-02 | hsa-miR-92a-1-5p hsa-miR-27a-3p hsa-miR-7-5p hsa-miR-93-5p hsa-miR-27b-3p hsa-miR-330-3p |
| 83758  | RBP5     | repression | protein-coding |     |  |  | 0 | 1.00E+00 |                                                                                          |
| 91433  | RCCD1    | activation | protein-coding |     |  |  | 1 | 5.81E-01 | hsa-miR-93-5p                                                                            |
| 283248 | RCOR2    | activation | protein-coding | Yes |  |  | 0 | 1.00E+00 |                                                                                          |
| 5959   | RDH5     | repression | protein-coding |     |  |  | 0 | 1.00E+00 |                                                                                          |
| 9401   | RECQL4   | activation | protein-coding |     |  |  | 0 | 1.00E+00 |                                                                                          |
| 28954  | REM1     | repression | protein-coding |     |  |  | 0 | 1.00E+00 |                                                                                          |
| 11079  | RER1     | repression | protein-coding |     |  |  | 1 | 5.81E-01 | hsa-miR-24-3p                                                                            |
| 79785  | RERGL    | repression | protein-coding |     |  |  | 0 | 1.00E+00 |                                                                                          |
| 55159  | RFWD3    | activation | protein-coding |     |  |  | 2 | 3.94E-01 | hsa-miR-330-3p hsa-miR-124-3p                                                            |
| 23179  | RGL1     | repression | protein-coding |     |  |  | 3 | 2.66E-01 | hsa-miR-25-3p hsa-miR-7-5p hsa-miR-93-5p                                                 |
| 8992   | ATP6V0E1 | repression | protein-coding |     |  |  | 3 | 3.43E-02 | hsa-miR-33a-5p hsa-miR-93-5p hsa-miR-124-3p                                              |
| 5998   | RGS3     | repression | protein-coding |     |  |  | 1 | 6.86E-01 | hsa-miR-25-3p                                                                            |
| 6006   | RHCE     | repression | protein-coding |     |  |  | 0 | 1.00E+00 |                                                                                          |
| 389    | RHOC     | repression | protein-coding |     |  |  | 1 | 6.86E-01 | hsa-miR-93-5p                                                                            |
| 399    | RHOH     | repression | protein-coding |     |  |  | 0 | 1.00E+00 |                                                                                          |
| 83547  | RILP     | repression | protein-coding |     |  |  | 0 | 1.00E+00 |                                                                                          |
| 6015   | RING1    | repression | protein-coding |     |  |  | 1 | 3.46E-01 | hsa-miR-1268a                                                                            |
| 8737   | RIPK1    | repression | protein-coding | Yes |  |  | 1 | 2.10E-01 | hsa-miR-24-3p                                                                            |
| 11035  | RIPK3    | repression | protein-coding | Yes |  |  | 0 | 1.00E+00 |                                                                                          |
| 134701 | RIPPLY2  | activation | protein-coding |     |  |  | 0 | 1.00E+00 |                                                                                          |
| 6038   | RNASE4   | repression | protein-coding |     |  |  | 0 | 1.00E+00 |                                                                                          |
| 10535  | RNASEH2A | activation | protein-coding |     |  |  | 0 | 1.00E+00 |                                                                                          |
| 26994  | RNF11    | repression | protein-coding |     |  |  | 5 | 6.26E-02 | hsa-miR-124-3p hsa-miR-24-3p hsa-miR-93-5p hsa-miR-25-3p hsa-miR-7-5p                    |
| 9604   | RNF14    | repression | protein-coding |     |  |  | 1 | 8.11E-01 | hsa-miR-7-5p                                                                             |
| 57484  | RNF150   | activation | protein-coding |     |  |  | 1 | 6.13E-01 | hsa-miR-320a                                                                             |
| 114804 | RNF157   | activation | protein-coding |     |  |  | 0 | 1.00E+00 |                                                                                          |
| 127544 | RNF19B   | repression | protein-coding |     |  |  | 0 | 1.00E+00 |                                                                                          |
| 57674  | RNF213   | repression | protein-coding |     |  |  | 1 | 7.45E-01 | hsa-miR-124-3p                                                                           |
| 11237  | RNF24    | activation | protein-coding |     |  |  | 2 | 4.42E-01 | hsa-miR-24-3p hsa-miR-93-5p                                                              |
| 200916 | RPL22L1  | activation | protein-coding |     |  |  | 0 | 1.00E+00 |                                                                                          |
| 6147   | RPL23A   | activation | protein-coding |     |  |  | 0 | 1.00E+00 |                                                                                          |
| 6159   | RPL29    | activation | protein-coding |     |  |  | 0 | 1.00E+00 |                                                                                          |
| 25873  | RPL36    | activation | protein-coding |     |  |  | 0 | 1.00E+00 |                                                                                          |
| 6125   | RPL5     | activation | protein-coding |     |  |  | 0 | 1.00E+00 |                                                                                          |

|        |          |            |                |     |     |     |   |          |                                                                                                      |
|--------|----------|------------|----------------|-----|-----|-----|---|----------|------------------------------------------------------------------------------------------------------|
| 6205   | RPS11    | activation | protein-coding |     |     |     | 0 | 1.00E+00 |                                                                                                      |
| 6210   | RPS15A   | activation | protein-coding |     |     |     | 0 | 1.00E+00 |                                                                                                      |
| 6187   | RPS2     | activation | protein-coding |     |     |     | 0 | 1.00E+00 |                                                                                                      |
| 6189   | RPS3A    | activation | protein-coding | Yes |     |     | 0 | 1.00E+00 |                                                                                                      |
| 113000 | RPUSD1   | activation | protein-coding |     |     |     | 0 | 1.00E+00 |                                                                                                      |
| 64121  | RRAGC    | repression | protein-coding |     |     |     | 0 | 1.00E+00 |                                                                                                      |
| 9136   | RRP9     | activation | protein-coding |     |     |     | 0 | 1.00E+00 |                                                                                                      |
| 26156  | RSL1D1   | activation | protein-coding |     |     |     | 0 | 1.00E+00 |                                                                                                      |
| 345895 | RSPH4A   | repression | protein-coding |     |     |     | 0 | 1.00E+00 |                                                                                                      |
| 23348  | DOCK9    | repression | protein-coding |     |     |     | 4 | 3.43E-02 | hsa-miR-25-3p hsa-miR-27a-3p hsa-miR-93-5p hsa-miR-27b-3p                                            |
| 57035  | RSRP1    | repression | protein-coding |     |     |     | 2 | 3.34E-01 | hsa-miR-24-3p hsa-miR-93-5p                                                                          |
| 25914  | RTTN     | activation | protein-coding |     |     |     | 1 | 5.11E-01 | hsa-miR-124-3p                                                                                       |
| 146923 | RUNDC1   | repression | protein-coding |     |     |     | 1 | 6.28E-01 | hsa-miR-93-5p                                                                                        |
| 864    | RUNX3    | repression | protein-coding | Yes |     |     | 3 | 2.03E-01 | hsa-miR-330-3p hsa-miR-93-5p hsa-miR-345-5p                                                          |
| 6281   | S100A10  | repression | protein-coding |     |     |     | 0 | 1.00E+00 |                                                                                                      |
| 6284   | S100A13  | repression | protein-coding |     |     |     | 0 | 1.00E+00 |                                                                                                      |
| 6285   | S100B    | repression | protein-coding |     |     |     | 1 | 1.27E-01 | hsa-miR-330-3p                                                                                       |
| 56940  | DUSP22   | repression | protein-coding |     |     | Yes | 3 | 3.43E-02 | hsa-miR-181d-5p hsa-miR-181a-5p hsa-miR-181b-5p                                                      |
| 113174 | SAAL1    | activation | protein-coding |     |     |     | 0 | 1.00E+00 |                                                                                                      |
| 154075 | SAMD3    | repression | protein-coding |     |     |     | 0 | 1.00E+00 |                                                                                                      |
| 8819   | SAP30    | activation | protein-coding |     |     |     | 0 | 1.00E+00 |                                                                                                      |
| 89958  | SAPCD2   | activation | protein-coding |     |     |     | 0 | 1.00E+00 |                                                                                                      |
| 54938  | SARS2    | activation | protein-coding |     |     |     | 0 | 1.00E+00 |                                                                                                      |
| 6303   | SAT1     | repression | protein-coding |     |     |     | 1 | 5.98E-01 | hsa-miR-320a                                                                                         |
| 388228 | SBK1     | activation | protein-coding |     | Yes |     | 1 | 1.00E+00 | hsa-miR-124-3p                                                                                       |
| 6332   | SCN7A    | repression | protein-coding |     |     |     | 0 | 1.00E+00 |                                                                                                      |
| 57758  | SCUBE2   | repression | protein-coding |     |     |     | 1 | 4.68E-01 | hsa-miR-7-5p                                                                                         |
| 6386   | SDCBP    | repression | protein-coding | Yes |     |     | 1 | 1.00E+00 | hsa-miR-93-5p                                                                                        |
| 51150  | SDF4     | repression | protein-coding |     |     |     | 0 | 1.00E+00 |                                                                                                      |
| 57001  | SDHAF3   | activation | protein-coding |     |     |     | 0 | 1.00E+00 |                                                                                                      |
| 1731   | SEPT1    | repression | protein-coding |     |     |     | 0 | 1.00E+00 |                                                                                                      |
| 55752  | SEPT11   | activation | protein-coding |     |     |     | 3 | 4.01E-01 | hsa-miR-124-3p hsa-miR-27b-3p hsa-miR-27a-3p                                                         |
| 5414   | SEPT4    | repression | protein-coding |     |     |     | 0 | 1.00E+00 |                                                                                                      |
| 1871   | E2F3     | activation | protein-coding | Yes |     |     | 7 | 3.43E-02 | hsa-miR-33a-5p hsa-miR-320a hsa-miR-124-3p hsa-miR-25-3p hsa-miR-93-5p hsa-miR-330-3p hsa-miR-345-5p |
| 1992   | SERPINB1 | repression | protein-coding |     |     |     | 0 | 1.00E+00 |                                                                                                      |
| 5271   | SERPINB8 | repression | protein-coding |     |     |     | 0 | 1.00E+00 |                                                                                                      |
| 6419   | SETMAR   | activation | protein-coding |     |     |     | 0 | 1.00E+00 |                                                                                                      |
| 8175   | SF3A2    | activation | protein-coding |     |     |     | 0 | 1.00E+00 |                                                                                                      |

|           |          |            |                |     |  |     |  |   |          |                                                                                         |
|-----------|----------|------------|----------------|-----|--|-----|--|---|----------|-----------------------------------------------------------------------------------------|
| 57659     | ZBTB4    | repression | protein-coding | Yes |  |     |  | 6 | 3.43E-02 | hsa-miR-2110 hsa-miR-181d-5p hsa-miR-7-5p hsa-miR-93-5p hsa-miR-181a-5p hsa-miR-181b-5p |
| 84826     | SFT2D3   | activation | protein-coding |     |  |     |  | 1 | 8.41E-01 | hsa-miR-124-3p                                                                          |
| 8910      | SGCE     | repression | protein-coding |     |  |     |  | 0 | 1.00E+00 |                                                                                         |
| 4734      | NEDD4    | repression | protein-coding |     |  |     |  | 6 | 3.50E-02 | hsa-miR-33a-5p hsa-miR-124-3p hsa-miR-27a-3p hsa-miR-7-5p hsa-miR-93-5p hsa-miR-27b-3p  |
| 151648    | SGOL1    | activation | protein-coding |     |  |     |  | 0 | 1.00E+00 |                                                                                         |
| 10019     | SH2B3    | repression | protein-coding |     |  |     |  | 5 | 8.82E-02 | hsa-miR-33a-5p hsa-miR-124-3p hsa-miR-24-3p hsa-miR-93-5p hsa-miR-320a                  |
| 10280     | SIGMAR1  | activation | protein-coding |     |  |     |  | 1 | 7.24E-01 | hsa-miR-7-5p                                                                            |
| 6494      | SIPA1    | repression | protein-coding |     |  |     |  | 0 | 1.00E+00 |                                                                                         |
| 284611    | FAM102B  | repression | protein-coding |     |  |     |  | 3 | 3.76E-02 | hsa-miR-181d-5p hsa-miR-181a-5p hsa-miR-181b-5p                                         |
| 51296     | SLC15A3  | repression | protein-coding |     |  |     |  | 0 | 1.00E+00 |                                                                                         |
| 116984    | ARAP2    | repression | protein-coding |     |  |     |  | 5 | 3.77E-02 | hsa-miR-181d-5p hsa-miR-7-5p hsa-miR-93-5p hsa-miR-181a-5p hsa-miR-181b-5p              |
| 6573      | SLC19A1  | activation | protein-coding |     |  |     |  | 0 | 1.00E+00 |                                                                                         |
| 9673      | SLC25A44 | repression | protein-coding |     |  |     |  | 2 | 4.00E-01 | hsa-miR-27a-3p hsa-miR-27b-3p                                                           |
| 284129    | SLC26A11 | repression | protein-coding |     |  |     |  | 2 | 8.43E-02 | hsa-miR-27a-3p hsa-miR-27b-3p                                                           |
| 56731     | SLC2A4RG | repression | protein-coding | Yes |  |     |  | 2 | 1.22E-01 | hsa-miR-320a hsa-miR-93-5p                                                              |
| 11182     | SLC2A6   | repression | protein-coding |     |  |     |  | 0 | 1.00E+00 |                                                                                         |
| 7781      | SLC30A3  | activation | protein-coding |     |  |     |  | 1 | 7.66E-01 | hsa-miR-296-5p                                                                          |
| 1318      | SLC31A2  | repression | protein-coding |     |  |     |  | 2 | 3.44E-01 | hsa-miR-24-3p hsa-miR-124-3p                                                            |
| 92745     | SLC38A5  | activation | protein-coding |     |  |     |  | 0 | 1.00E+00 |                                                                                         |
| 11309     | SLCO2B1  | repression | protein-coding |     |  |     |  | 1 | 5.81E-01 | hsa-miR-296-5p                                                                          |
| 64744     | SMAP2    | repression | protein-coding |     |  |     |  | 1 | 1.00E+00 | hsa-miR-2110                                                                            |
| 23642     | SNHG1    | activation | ncRNA          |     |  |     |  | 0 | 1.00E+00 |                                                                                         |
| 100093630 | SNHG8    | activation | ncRNA          |     |  |     |  | 0 | 1.00E+00 |                                                                                         |
| 6632      | SNRPD1   | activation | protein-coding |     |  |     |  | 1 | 6.86E-01 | hsa-miR-124-3p                                                                          |
| 6637      | SNRPG    | activation | protein-coding |     |  |     |  | 0 | 1.00E+00 |                                                                                         |
| 3628      | INPP1    | repression | protein-coding |     |  | Yes |  | 2 | 3.77E-02 | hsa-miR-27a-3p hsa-miR-27b-3p                                                           |
| 257364    | SNX33    | repression | protein-coding |     |  |     |  | 1 | 3.18E-01 | hsa-miR-7-5p                                                                            |
| 51429     | SNX9     | repression | protein-coding |     |  |     |  | 3 | 2.66E-01 | hsa-miR-7-5p hsa-miR-93-5p hsa-miR-33a-5p                                               |
| 9576      | SPAG6    | repression | protein-coding |     |  |     |  | 0 | 1.00E+00 |                                                                                         |
| 54558     | SPATA6   | repression | protein-coding |     |  |     |  | 1 | 4.68E-01 | hsa-miR-320a                                                                            |
| 9806      | SPOCK2   | repression | protein-coding |     |  |     |  | 1 | 1.00E+00 | hsa-miR-25-3p                                                                           |
| 84727     | SPSB2    | repression | protein-coding |     |  |     |  | 0 | 1.00E+00 |                                                                                         |

|        |            |            |                |     |     |     |   |          |                                                                       |
|--------|------------|------------|----------------|-----|-----|-----|---|----------|-----------------------------------------------------------------------|
| 6711   | SPTBN1     | repression | protein-coding |     |     |     | 4 | 3.77E-01 | hsa-miR-124-3p hsa-miR-93-5p hsa-miR-27b-3p hsa-miR-27a-3p            |
| 58472  | SQRDL      | repression | protein-coding |     |     |     | 0 | 1.00E+00 |                                                                       |
| 8878   | SQSTM1     | repression | protein-coding |     |     |     | 3 | 5.30E-02 | hsa-miR-7-5p hsa-miR-93-5p hsa-miR-124-3p                             |
| 80725  | SRCIN1     | repression | protein-coding |     |     |     | 1 | 1.00E+00 | hsa-miR-93-5p                                                         |
| 6429   | SRSF4      | repression | protein-coding |     |     |     | 0 | 1.00E+00 |                                                                       |
| 6744   | SSFA2      | repression | protein-coding |     |     |     | 3 | 4.32E-01 | hsa-miR-124-3p hsa-miR-25-3p hsa-miR-93-5p                            |
| 29101  | SSU72      | repression | protein-coding |     |     | Yes | 0 | 1.00E+00 |                                                                       |
| 10610  | ST6GALNAC2 | repression | protein-coding |     |     |     | 0 | 1.00E+00 |                                                                       |
| 6776   | STAT5A     | repression | protein-coding | Yes |     |     | 0 | 1.00E+00 |                                                                       |
| 388341 | LRRC75A    | repression | protein-coding |     |     |     | 2 | 3.77E-02 | hsa-miR-2110 hsa-miR-296-5p                                           |
| 6793   | STK10      | repression | protein-coding |     | Yes |     | 3 | 5.64E-02 | hsa-miR-24-3p hsa-miR-27a-3p hsa-miR-27b-3p                           |
| 9263   | STK17A     | repression | protein-coding |     | Yes |     | 0 | 1.00E+00 |                                                                       |
| 8675   | STX16      | repression | protein-coding |     |     |     | 5 | 8.30E-02 | hsa-miR-2110 hsa-miR-24-3p hsa-miR-27b-3p hsa-miR-27a-3p hsa-miR-7-5p |
| 6813   | STXBP2     | repression | protein-coding |     |     |     | 0 | 1.00E+00 |                                                                       |
| 6832   | SUPV3L1    | activation | protein-coding |     |     |     | 0 | 1.00E+00 |                                                                       |
| 79723  | SUV39H2    | activation | protein-coding |     |     |     | 2 | 6.54E-01 | hsa-miR-33a-5p hsa-miR-93-5p                                          |
| 55638  | SYBU       | repression | protein-coding |     |     |     | 3 | 1.84E-01 | hsa-miR-93-5p hsa-miR-27b-3p hsa-miR-27a-3p                           |
| 10388  | SYCP2      | repression | protein-coding |     |     |     | 0 | 1.00E+00 |                                                                       |
| 10940  | POP1       | activation | protein-coding |     |     |     | 2 | 3.77E-02 | hsa-miR-27a-3p hsa-miR-27b-3p                                         |
| 8871   | SYNJ2      | repression | protein-coding |     |     | Yes | 1 | 6.71E-01 | hsa-miR-24-3p                                                         |
| 23336  | SYNM       | repression | protein-coding |     |     |     | 1 | 1.00E+00 | hsa-miR-93-5p                                                         |
| 7185   | TRAF1      | repression | protein-coding | Yes |     |     | 2 | 3.77E-02 | hsa-miR-27b-3p hsa-miR-27a-3p                                         |
| 84870  | RSPO3      | repression | protein-coding |     |     |     | 3 | 3.95E-02 | hsa-miR-24-3p hsa-miR-27a-3p hsa-miR-27b-3p                           |
| 6867   | TACC1      | repression | protein-coding | Yes |     |     | 3 | 9.04E-01 | hsa-miR-124-3p hsa-miR-93-5p hsa-miR-25-3p                            |
| 6883   | TAF12      | repression | protein-coding | Yes |     |     | 1 | 9.72E-01 | hsa-miR-7-5p                                                          |
| 79101  | TAF1D      | activation | protein-coding | Yes |     |     | 0 | 1.00E+00 |                                                                       |
| 128989 | TANGO2     | repression | protein-coding |     |     |     | 1 | 1.72E-01 | hsa-miR-24-3p                                                         |
| 8887   | TAX1BP1    | repression | protein-coding | Yes |     |     | 0 | 1.00E+00 |                                                                       |
| 55357  | TBC1D2     | repression | protein-coding |     |     |     | 1 | 7.92E-01 | hsa-miR-93-5p                                                         |
| 6932   | TCF7       | repression | protein-coding | Yes |     |     | 2 | 7.00E-01 | hsa-miR-2110 hsa-miR-24-3p                                            |
| 7015   | TERT       | activation | protein-coding |     |     |     | 0 | 1.00E+00 |                                                                       |
| 7023   | TFAP4      | activation | protein-coding | Yes |     |     | 2 | 4.20E-01 | hsa-miR-760 hsa-miR-124-3p                                            |

|        |           |            |                |     |     |     |  |   |          |                                                                            |
|--------|-----------|------------|----------------|-----|-----|-----|--|---|----------|----------------------------------------------------------------------------|
| 22797  | TFEC      | repression | protein-coding | Yes |     |     |  | 3 | 4.09E-01 | hsa-miR-33a-5p hsa-miR-124-3p hsa-miR-7-5p                                 |
| 7048   | TGFBR2    | repression | protein-coding |     | Yes |     |  | 5 | 1.05E-01 | hsa-miR-181d-5p hsa-miR-93-5p hsa-miR-320a hsa-miR-181a-5p hsa-miR-181b-5p |
| 286336 | FAM78A    | repression | protein-coding |     |     |     |  | 4 | 4.34E-02 | hsa-miR-33a-5p hsa-miR-24-3p hsa-miR-27a-3p hsa-miR-27b-3p                 |
| 51337  | THEM6     | activation | protein-coding |     |     |     |  | 0 | 1.00E+00 |                                                                            |
| 84321  | THOC3     | activation | protein-coding |     |     |     |  | 0 | 1.00E+00 |                                                                            |
| 7067   | THRA      | repression | protein-coding | Yes |     |     |  | 4 | 5.09E-02 | hsa-miR-2110 hsa-miR-93-5p hsa-miR-27b-3p hsa-miR-27a-3p                   |
| 80745  | THUMPD2   | activation | protein-coding |     |     |     |  | 0 | 1.00E+00 |                                                                            |
| 7074   | TIAM1     | activation | protein-coding |     |     |     |  | 4 | 1.74E-01 | hsa-miR-320a hsa-miR-24-3p hsa-miR-93-5p hsa-miR-7-5p                      |
| 200765 | TIGD1     | activation | protein-coding |     |     |     |  | 0 | 1.00E+00 |                                                                            |
| 92609  | TIMM50    | activation | protein-coding |     |     | Yes |  | 0 | 1.00E+00 |                                                                            |
| 7098   | TLR3      | repression | protein-coding | Yes |     |     |  | 0 | 1.00E+00 |                                                                            |
| 3196   | TLX2      | activation | protein-coding |     |     |     |  | 0 | 1.00E+00 |                                                                            |
| 83941  | TM2D1     | repression | protein-coding |     |     |     |  | 1 | 4.00E-01 | hsa-miR-24-3p                                                              |
| 51643  | TMBIM4    | repression | protein-coding |     |     |     |  | 0 | 1.00E+00 |                                                                            |
| 55330  | BLOC1S4   | activation | protein-coding |     |     |     |  | 2 | 4.53E-02 | hsa-miR-7-5p hsa-miR-24-3p                                                 |
| 284114 | TMEM102   | repression | protein-coding |     |     |     |  | 0 | 1.00E+00 |                                                                            |
| 222865 | TMEM130   | repression | protein-coding |     |     |     |  | 0 | 1.00E+00 |                                                                            |
| 25829  | TMEM184B  | repression | protein-coding |     |     |     |  | 3 | 1.01E-01 | hsa-miR-25-3p hsa-miR-760 hsa-miR-124-3p                                   |
| 114801 | TMEM200A  | repression | protein-coding |     |     |     |  | 0 | 1.00E+00 |                                                                            |
| 84065  | TMEM222   | repression | protein-coding |     |     |     |  | 0 | 1.00E+00 |                                                                            |
| 56063  | TMEM234   | repression | protein-coding |     |     |     |  | 0 | 1.00E+00 |                                                                            |
| 55069  | TMEM248   | repression | protein-coding |     |     |     |  | 4 | 9.06E-02 | hsa-miR-33a-5p hsa-miR-124-3p hsa-miR-27b-3p hsa-miR-27a-3p                |
| 23585  | TMEM50A   | repression | protein-coding |     |     |     |  | 1 | 4.68E-01 | hsa-miR-25-3p                                                              |
| 283232 | TMEM80    | repression | protein-coding |     |     |     |  | 0 | 1.00E+00 |                                                                            |
| 7203   | CCT3      | activation | protein-coding |     |     |     |  | 2 | 4.53E-02 | hsa-miR-24-3p hsa-miR-33a-5p                                               |
| 27346  | TMEM97    | activation | protein-coding |     |     |     |  | 1 | 8.41E-01 | hsa-miR-7-5p                                                               |
| 355    | FAS       | repression | protein-coding |     |     |     |  | 3 | 4.53E-02 | hsa-miR-25-3p hsa-miR-27a-3p hsa-miR-27b-3p                                |
| 286527 | TMSB15B   | activation | protein-coding |     |     |     |  | 1 | 4.89E-01 | hsa-miR-24-3p                                                              |
| 25816  | TNFAIP8   | repression | protein-coding |     |     |     |  | 2 | 4.98E-01 | hsa-miR-93-5p hsa-miR-124-3p                                               |
| 79626  | TNFAIP8L2 | repression | protein-coding |     |     |     |  | 0 | 1.00E+00 |                                                                            |
| 51330  | TNFRSF12A | repression | protein-coding |     |     |     |  | 0 | 1.00E+00 |                                                                            |
| 8764   | TNFRSF14  | repression | protein-coding |     |     |     |  | 0 | 1.00E+00 |                                                                            |
| 23371  | TNS2      | repression | protein-coding |     |     | Yes |  | 0 | 1.00E+00 |                                                                            |

|        |          |            |                |     |     |  |   |          |                                                                                        |
|--------|----------|------------|----------------|-----|-----|--|---|----------|----------------------------------------------------------------------------------------|
| 10043  | TOM1     | repression | protein-coding |     |     |  | 1 | 5.81E-01 | hsa-miR-124-3p                                                                         |
| 146691 | TOM1L2   | repression | protein-coding |     |     |  | 0 | 1.00E+00 |                                                                                        |
| 9804   | TOMM20   | activation | protein-coding |     |     |  | 3 | 3.18E-01 | hsa-miR-181d-5p hsa-miR-181a-5p hsa-miR-181b-5p                                        |
| 58476  | TP53INP2 | repression | protein-coding |     |     |  | 4 | 1.78E-01 | hsa-miR-2110 hsa-miR-124-3p hsa-miR-93-5p hsa-miR-7-5p                                 |
| 27010  | TPK1     | repression | protein-coding |     |     |  | 0 | 1.00E+00 |                                                                                        |
| 7172   | TPMT     | repression | protein-coding |     |     |  | 1 | 5.11E-01 | hsa-miR-25-3p                                                                          |
| 51673  | TPPP3    | repression | protein-coding |     |     |  | 0 | 1.00E+00 |                                                                                        |
| 127262 | TPRG1L   | repression | protein-coding |     |     |  | 1 | 5.98E-01 | hsa-miR-93-5p                                                                          |
| 8717   | TRADD    | repression | protein-coding | Yes |     |  | 0 | 1.00E+00 |                                                                                        |
| 130026 | ICA1L    | repression | protein-coding |     |     |  | 3 | 4.53E-02 | hsa-miR-33a-5p hsa-miR-24-3p hsa-miR-7-5p                                              |
| 9697   | TRAM2    | repression | protein-coding |     |     |  | 3 | 4.74E-01 | hsa-miR-124-3p hsa-miR-7-5p hsa-miR-25-3p                                              |
| 27095  | TRAPPC3  | repression | protein-coding |     |     |  | 0 | 1.00E+00 |                                                                                        |
| 10155  | TRIM28   | activation | protein-coding | Yes |     |  | 0 | 1.00E+00 |                                                                                        |
| 10475  | TRIM38   | repression | protein-coding | Yes |     |  | 0 | 1.00E+00 |                                                                                        |
| 57468  | SLC12A5  | repression | protein-coding |     |     |  | 5 | 4.53E-02 | hsa-miR-33a-5p hsa-miR-181d-5p hsa-miR-25-3p hsa-miR-181a-5p hsa-miR-181b-5p           |
| 11078  | TRIOBP   | repression | protein-coding |     |     |  | 2 | 2.66E-01 | hsa-miR-24-3p hsa-miR-93-5p                                                            |
| 54802  | TRIT1    | repression | protein-coding |     |     |  | 1 | 4.68E-01 | hsa-miR-24-3p                                                                          |
| 55621  | TRMT1    | activation | protein-coding |     |     |  | 0 | 1.00E+00 |                                                                                        |
| 7226   | TRPM2    | repression | protein-coding |     |     |  | 0 | 1.00E+00 |                                                                                        |
| 25987  | TSKU     | activation | protein-coding |     |     |  | 2 | 2.16E-01 | hsa-miR-93-5p hsa-miR-124-3p                                                           |
| 7106   | TSPAN4   | repression | protein-coding |     |     |  | 0 | 1.00E+00 |                                                                                        |
| 22996  | TTC39A   | repression | protein-coding |     |     |  | 2 | 4.53E-02 | hsa-miR-27a-3p hsa-miR-27b-3p                                                          |
| 7272   | TTK      | activation | protein-coding |     | Yes |  | 0 | 1.00E+00 |                                                                                        |
| 23170  | TLL12    | activation | protein-coding |     |     |  | 0 | 1.00E+00 |                                                                                        |
| 7291   | TWIST1   | activation | protein-coding | Yes |     |  | 1 | 6.28E-01 | hsa-miR-33a-5p                                                                         |
| 200081 | TXLNA    | repression | protein-coding |     |     |  | 2 | 9.13E-01 | hsa-miR-124-3p hsa-miR-93-5p                                                           |
| 116068 | LYSMD3   | repression | protein-coding |     |     |  | 6 | 4.54E-02 | hsa-miR-33a-5p hsa-miR-124-3p hsa-miR-93-5p hsa-miR-320a hsa-miR-27b-3p hsa-miR-27a-3p |
| 10628  | TXNIP    | repression | protein-coding |     |     |  | 4 | 7.26E-02 | hsa-miR-93-5p hsa-miR-320a hsa-miR-27b-3p hsa-miR-27a-3p                               |
| 10907  | TXNL4A   | activation | protein-coding |     |     |  | 0 | 1.00E+00 |                                                                                        |
| 7298   | TYMS     | activation | protein-coding |     |     |  | 0 | 1.00E+00 |                                                                                        |
| 11338  | U2AF2    | activation | protein-coding |     |     |  | 0 | 1.00E+00 |                                                                                        |
| 124402 | UBALD1   | activation | protein-coding |     |     |  | 0 | 1.00E+00 |                                                                                        |
| 55833  | UBAP2    | activation | protein-coding |     |     |  | 0 | 1.00E+00 |                                                                                        |

|        |         |            |                |     |  |  |   |          |                                                                                     |
|--------|---------|------------|----------------|-----|--|--|---|----------|-------------------------------------------------------------------------------------|
| 11065  | UBE2C   | activation | protein-coding |     |  |  | 0 | 1.00E+00 |                                                                                     |
| 7328   | UBE2H   | repression | protein-coding |     |  |  | 0 | 1.00E+00 |                                                                                     |
| 7329   | UBE2I   | activation | protein-coding | Yes |  |  | 0 | 1.00E+00 |                                                                                     |
| 118424 | UBE2J2  | repression | protein-coding |     |  |  | 0 | 1.00E+00 |                                                                                     |
| 27338  | UBE2S   | activation | protein-coding |     |  |  | 0 | 1.00E+00 |                                                                                     |
| 23499  | MACF1   | repression | protein-coding |     |  |  | 4 | 4.54E-02 | hsa-miR-33a-5p hsa-miR-296-5p hsa-miR-93-5p hsa-miR-124-3p                          |
| 23352  | UBR4    | repression | protein-coding |     |  |  | 0 | 1.00E+00 |                                                                                     |
| 84333  | PCGF5   | repression | protein-coding |     |  |  | 6 | 4.54E-02 | hsa-miR-33a-5p hsa-miR-124-3p hsa-miR-24-3p hsa-miR-320a hsa-miR-25-3p hsa-miR-7-5p |
| 201294 | UNC13D  | repression | protein-coding |     |  |  | 0 | 1.00E+00 |                                                                                     |
| 7378   | UPP1    | repression | protein-coding |     |  |  | 0 | 1.00E+00 |                                                                                     |
| 84300  | UQCC2   | activation | protein-coding |     |  |  | 0 | 1.00E+00 |                                                                                     |
| 7386   | UQCRFS1 | activation | protein-coding |     |  |  | 0 | 1.00E+00 |                                                                                     |
| 9816   | URB2    | activation | protein-coding |     |  |  | 1 | 4.55E-01 | hsa-miR-33a-5p                                                                      |
| 27340  | UTP20   | activation | protein-coding |     |  |  | 0 | 1.00E+00 |                                                                                     |
| 7402   | UTRN    | repression | protein-coding |     |  |  | 2 | 8.78E-01 | hsa-miR-7-5p hsa-miR-93-5p                                                          |
| 7407   | VARS    | activation | protein-coding |     |  |  | 0 | 1.00E+00 |                                                                                     |
| 10493  | VAT1    | repression | protein-coding |     |  |  | 1 | 1.00E+00 | hsa-miR-124-3p                                                                      |
| 57687  | VAT1L   | repression | protein-coding |     |  |  | 3 | 1.25E-01 | hsa-miR-24-3p hsa-miR-27b-3p hsa-miR-27a-3p                                         |
| 25806  | VAX2    | activation | protein-coding | Yes |  |  | 0 | 1.00E+00 |                                                                                     |
| 9525   | VPS4B   | repression | protein-coding |     |  |  | 3 | 1.33E-01 | hsa-miR-25-3p hsa-miR-124-3p hsa-miR-320a                                           |
| 55759  | WDR12   | activation | protein-coding |     |  |  | 0 | 1.00E+00 |                                                                                     |
| 57418  | WDR18   | activation | protein-coding |     |  |  | 0 | 1.00E+00 |                                                                                     |
| 604    | BCL6    | repression | protein-coding | Yes |  |  | 5 | 4.71E-02 | hsa-miR-181d-5p hsa-miR-124-3p hsa-miR-93-5p hsa-miR-181a-5p hsa-miR-181b-5p        |
| 23160  | WDR43   | activation | protein-coding |     |  |  | 3 | 5.90E-02 | hsa-miR-345-5p hsa-miR-27a-3p hsa-miR-27b-3p                                        |
| 144406 | WDR66   | repression | protein-coding |     |  |  | 0 | 1.00E+00 |                                                                                     |
| 79819  | WDR78   | repression | protein-coding |     |  |  | 0 | 1.00E+00 |                                                                                     |
| 29062  | WDR91   | repression | protein-coding |     |  |  | 0 | 1.00E+00 |                                                                                     |
| 7456   | WIPF1   | repression | protein-coding |     |  |  | 4 | 2.52E-01 | hsa-miR-124-3p hsa-miR-24-3p hsa-miR-320a hsa-miR-7-5p                              |
| 116496 | FAM129A | repression | protein-coding |     |  |  | 4 | 4.71E-02 | hsa-miR-25-3p hsa-miR-33a-5p hsa-miR-93-5p hsa-miR-124-3p                           |
| 55841  | WWC3    | repression | protein-coding |     |  |  | 1 | 1.00E+00 | hsa-miR-124-3p                                                                      |
| 3659   | IRF1    | repression | protein-coding | Yes |  |  | 4 | 4.71E-02 | hsa-miR-24-3p hsa-miR-93-5p hsa-miR-124-3p hsa-miR-345-5p                           |
| 7516   | XRCC2   | activation | protein-coding |     |  |  | 0 | 1.00E+00 |                                                                                     |

|        |         |            |                |     |  |  |   |          |                                                                                           |
|--------|---------|------------|----------------|-----|--|--|---|----------|-------------------------------------------------------------------------------------------|
| 10413  | YAP1    | repression | protein-coding | Yes |  |  | 5 | 8.82E-02 | hsa-miR-33a-5p hsa-miR-124-3p hsa-miR-7-5p hsa-miR-27b-3p hsa-miR-27a-3p                  |
| 51067  | YARS2   | activation | protein-coding |     |  |  | 0 | 1.00E+00 |                                                                                           |
| 150223 | YDJC    | activation | protein-coding |     |  |  | 0 | 1.00E+00 |                                                                                           |
| 54502  | RBM47   | repression | protein-coding |     |  |  | 5 | 4.71E-02 | hsa-miR-181d-5p hsa-miR-124-3p hsa-miR-25-3p hsa-miR-181a-5p hsa-miR-181b-5p              |
| 64766  | S100BPB | repression | protein-coding |     |  |  | 6 | 4.84E-02 | hsa-miR-181d-5p hsa-miR-124-3p hsa-miR-7-5p hsa-miR-93-5p hsa-miR-181a-5p hsa-miR-181b-5p |
| 7704   | ZBTB16  | repression | protein-coding | Yes |  |  | 0 | 1.00E+00 |                                                                                           |
| 49854  | ZBTB21  | activation | protein-coding |     |  |  | 4 | 1.31E-01 | hsa-miR-124-3p hsa-miR-93-5p hsa-miR-181b-5p hsa-miR-345-5p                               |
| 5412   | UBL3    | repression | protein-coding |     |  |  | 5 | 4.84E-02 | hsa-miR-181d-5p hsa-miR-124-3p hsa-miR-330-3p hsa-miR-181b-5p hsa-miR-181a-5p             |
| 140685 | ZBTB46  | repression | protein-coding |     |  |  | 0 | 1.00E+00 |                                                                                           |
| 3104   | ZBTB48  | repression | protein-coding | Yes |  |  | 0 | 1.00E+00 |                                                                                           |
| 339487 | ZBTB8OS | repression | protein-coding |     |  |  | 0 | 1.00E+00 |                                                                                           |
| 84524  | ZC3H8   | activation | protein-coding | Yes |  |  | 0 | 1.00E+00 |                                                                                           |
| 219654 | ZCCHC24 | repression | protein-coding |     |  |  | 5 | 1.07E-01 | hsa-miR-124-3p hsa-miR-24-3p hsa-miR-27b-3p hsa-miR-330-3p hsa-miR-27a-3p                 |
| 441951 | ZFAS1   | activation | ncRNA          |     |  |  | 0 | 1.00E+00 |                                                                                           |
| 7538   | ZFP36   | repression | protein-coding |     |  |  | 3 | 7.30E-02 | hsa-miR-7-5p hsa-miR-27a-3p hsa-miR-27b-3p                                                |
| 84619  | ZGPAT   | repression | protein-coding | Yes |  |  | 0 | 1.00E+00 |                                                                                           |
| 284307 | ZIK1    | activation | protein-coding |     |  |  | 0 | 1.00E+00 |                                                                                           |
| 9204   | ZMYM6   | repression | protein-coding |     |  |  | 0 | 1.00E+00 |                                                                                           |
| 51222  | ZNF219  | activation | protein-coding | Yes |  |  | 2 | 7.19E-02 | hsa-miR-124-3p hsa-miR-296-5p                                                             |
| 8187   | ZNF239  | activation | protein-coding | Yes |  |  | 0 | 1.00E+00 |                                                                                           |
| 55659  | ZNF416  | activation | protein-coding |     |  |  | 0 | 1.00E+00 |                                                                                           |
| 7594   | ZNF43   | activation | protein-coding | Yes |  |  | 0 | 1.00E+00 |                                                                                           |
| 80818  | ZNF436  | repression | protein-coding | Yes |  |  | 4 | 8.03E-02 | hsa-miR-24-3p hsa-miR-181b-5p hsa-miR-320a hsa-miR-7-5p                                   |
| 197407 | ZNF48   | activation | protein-coding |     |  |  | 0 | 1.00E+00 |                                                                                           |
| 147929 | ZNF565  | activation | protein-coding | Yes |  |  | 0 | 1.00E+00 |                                                                                           |
| 51545  | ZNF581  | activation | protein-coding |     |  |  | 0 | 1.00E+00 |                                                                                           |
| 7625   | ZNF74   | activation | protein-coding | Yes |  |  | 0 | 1.00E+00 |                                                                                           |
| 7554   | ZNF8    | activation | protein-coding |     |  |  | 0 | 1.00E+00 |                                                                                           |
| 57169  | ZNFX1   | repression | protein-coding |     |  |  | 1 | 1.00E+00 | hsa-miR-93-5p                                                                             |
| 9753   | ZSCAN12 | activation | protein-coding | Yes |  |  | 2 | 1.48E-01 | hsa-miR-25-3p hsa-miR-7-5p                                                                |



**Supplementary Table S4: Primers listed in 5' to 3' for ChIP-qPCR**

| <b>Peak</b> | <b>Forward</b>          | <b>Reverse</b>           |
|-------------|-------------------------|--------------------------|
| peak_1427   | CAGAGACCTCACTTCCTCGC    | CAGGCAAGAGCACAACATGG     |
| peak_3070   | CTTGATACTAAGTAGCCCTCCCC | TCCCGTTTTTCTCAGATCTTCAGT |
| peak_3071   | ATTTCAAAGGGCTTCGGGGT    | GTCGCCACGAATCTGAGAGG     |
| peak_4674   | TCTGACCCAGCCTCTGCTTA    | GCTGTCCGGGTGTGAAGTAA     |
| peak_4675   | GGGCAGAACAGATTCAGGCA    | ACCGGTATAAAGCGGTAGGC     |
| peak_4676   | CGGCTGGGAGCTTTAGGAG     | ACCCGCTTAGCTCCATTTC      |
| peak_4677   | CACACGTGAGGTGCGTAATG    | CTGGGATAGCTTCCTCCCCT     |
| peak_4978   | GGCCGGAGAAAACACGAGTA    | ATGGCTGTTGCTTGGCAATG     |
| peak_9403   | GGTAACCTGTCTGCAGTGGG    | AAGGTGGGGCCTCCTGG        |
| peak_9404   | GTGGGCACATTGAGTTGCAC    | GAACCTGTCTCTGCGGTCTG     |
| peak_17259  | AGTTGGTCTTTTTGGAATGAGCC | AGCAAAGTTCCAGACAGAGGT    |
| peak_39619  | GAGATCCGTGGGCTCCTTTG    | GATCTAGAGCTTTCCAGGCC     |
| peak_43652  | CCCTCTCTCACCCCGAG       | AACTTTCCAACAGCCCGAGG     |
| peak_44366  | GAAGTGAGGCTAGCGGAGC     | AGCAAAGCAACTGAAAGCGG     |
| peak_44367  | GGAGACATCGACGGTGAGTG    | CGCCGTAACCCCTTCCTC       |
| peak_66706  | GGAGACACAGTGAGTGAGTGG   | TGTCCCTTTCACGCTTCTCC     |
| peak_66707  | CTGTTCCCTTCCATTGGGGT    | TGAGCCAAGTAACAAAGTCCAAC  |
| peak_66488  | CGAACCCAAGGTGCTTTGTC    | ATCCACTGCCTTTGGTTGGG     |
